# Supplementary material for: Sequencing of the smallest Apicomplexan genome from the human pathogen Babesia microti
Source: PubMed Central journal article supplement — Nucleic Acids Res. 2012 Jul 24;40(18):9102–14. doi: 10.1093/nar/gks700 (PMC3467087; doi:10.1093/nar/gks700), 2012-07-24
Supplement: supp_gks700_nar-00802-h-2012-File009.pdf [file supp_gks700_nar-00802-h-2012-File009.pdf]

| Bbovis         | Tannulata | Pfalciparum | Lmajor      | Scerevisiae | ko_Bbo | ko_Tan | ko_Pfa | ko_Lma | ko_Sce | Bmicroti   | o | Label | k | d | ko_synth | Ko_valid | Definition / Comments                                         |
|----------------|-----------|-------------|-------------|-------------|--------|--------|--------|--------|--------|------------|---|-------|---|---|----------|----------|---------------------------------------------------------------|
|                |           |             |             |             |        |        |        |        |        | BBM_I00001 | 0 |       | 0 | 0 | NA       | Valid    | Vesa-like                                                     |
|                |           |             |             |             |        |        |        |        |        | BBM_I00002 | 0 |       | 0 | 0 | NA       |          |                                                               |
|                |           |             |             |             |        |        |        |        |        | BBM_I00003 | 0 |       | 0 | 0 | NA       |          |                                                               |
|                |           |             |             |             |        |        |        |        |        | BBM_I00004 | 0 |       | 0 | 0 | NA       | Valid    | BMN family (1)                                                |
|                | TA15445   |             |             |             |        |        |        |        |        | BBM_I00005 | 1 |       | 0 | 0 | NA       | Valid    | Tpr related protein, putative                                 |
|                |           |             |             | YBL010C     |        |        |        |        |        | BBM_I00015 | 1 |       | 0 | 0 | NA       | K00949   | TPK, Thiamine pyrophosphokinase                               |
| BBOV_IV011270  | TA09590   | PF13_0141   | LmjF34.0150 | YDL078C     |        |        | K00016 | K00026 | K00026 | BBM_I00020 | 5 |       | 3 | 2 | NA       | K00016   | L-lactate dehydrogenase [EC:1.1.1.27]                         |
| BBOV_IV003900  | TA16970   | PFE0285c    | LmjF08.0470 | YDR510W     | K12160 | K12160 | K12160 | K12160 | K12160 | BBM_I00025 | 5 |       | 5 | 1 | K12160   | K12160   | small ubiquitin-related modifier                              |
| BBOV_I001690   |           | PFB0195c    |             |             |        |        |        |        |        | BBM_I00030 | 2 |       | 0 | 0 | NA       |          |                                                               |
|                |           |             |             |             |        |        |        |        |        | BBM_I00035 | 0 |       | 0 | 0 | NA       |          |                                                               |
| BBOV_IV003920  | TA16960   |             |             |             |        |        |        |        |        | BBM_I00040 | 2 | piro  | 0 | 0 | Valid    |          |                                                               |
| BBOV_I002460   | TA08110   | MAL13P1.244 | LmjF30.1350 | YOR070C     |        |        |        |        |        | BBM_I00045 | 5 |       | 0 | 0 | Valid    | Valid    | TBC domain containing protein                                 |
| BBOV_I002190   | TA08105   | PF14_0186   | LmjF29.1150 | YDR475C     |        |        |        |        |        | BBM_I00050 | 5 |       | 0 | 0 | Valid    |          |                                                               |
| BBOV_I002200   | TA08100   | PF14_0188   |             | YHL030W     |        |        |        |        | K11886 | BBM_I00055 | 4 | api+  | 1 | 1 | Valid    |          |                                                               |
| BBOV_I002210   | TA08095   | PFL0095c    |             |             |        |        |        |        |        | BBM_I00070 | 3 | api   | 0 | 0 | Valid    |          |                                                               |
| BBOV_IV003970  | TA16935   |             |             | YNL110C     | K14838 | K14838 |        |        | K14838 | BBM_I00075 | 3 |       | 3 | 1 | K14838   | K14838   | NOP15, nucleolar protein 15                                   |
|                | TA15415   |             |             |             |        |        |        |        |        | BBM_I00080 | 1 |       | 0 | 0 | NA       |          |                                                               |
| BBOV_IV004000  | TA16925   | PFC0965w    |             |             |        |        |        |        |        | BBM_I00085 | 3 | api   | 0 | 0 | Valid    |          |                                                               |
| BBOV_IV004010  | TA16915   |             |             |             |        | K14549 |        |        |        | BBM_I00087 | 2 | piro  | 1 | 1 | Valid    |          |                                                               |
| BBOV_IV004020  | TA16910   | MAL13P1.67  |             | YLR417W     |        |        | K00604 |        | K12190 | BBM_I00090 | 4 | api+  | 2 | 2 | Valid    |          |                                                               |
| BBOV_IV004030  | TA16905   | PFIO670w    |             |             |        |        |        |        |        | BBM_I00095 | 3 | api   | 0 | 0 | Valid    |          |                                                               |
| BBOV_I004390   | TA16890   |             |             |             | K01887 | K01887 |        |        |        | BBM_I00100 | 2 | piro  | 2 | 1 | K01887   | K01887   | arginyl-tRNA synthetase [EC:6.1.1.19]                         |
| BBOV_I0011610  | TA16810   | PFIO685w    | LmjF15.0360 | YDL036C     |        | K01718 | K01718 |        |        | BBM_I00105 | 5 |       | 2 | 1 | K01718   | K01718   | pseudouridylylase [EC:4.2.1.70]                               |
| BBOV_I0011600  | TA16815   | PFE0335w    |             |             |        |        |        |        |        | BBM_I00115 | 3 | api   | 0 | 0 | Valid    |          |                                                               |
| BBOV_IV003760  | TA16825   | PF11_0047   |             |             |        |        |        |        |        | BBM_I00120 | 3 | api   | 0 | 0 | Valid    |          |                                                               |
| BBOV_I000130   | TA17395   | PF11_0293   | LmjF19.0190 | YOR298C-A   | K03627 | K03627 | K03627 | K03627 | K03627 | BBM_I00125 | 5 |       | 5 | 1 | K03627   | K03627   | putative transcription factor                                 |
| BBOV_I000120   | TA17400   | PF11_0295   | LmjF22.1360 | YJL167W     | K00787 | K00787 | K00787 | K00787 | K00787 | BBM_I00130 | 5 |       | 5 | 1 | K00787   | K00787   | farnesyl diphosphate synthase [EC:2.5.1.1 2.5.1.10]           |
|                |           |             |             |             |        |        |        |        |        | BBM_I00132 |   |       |   |   | Valid    |          | trRNA, Ile, anticodon AAT                                     |
| BBOV_I000140   | TA17390   | PF11_0458   | LmjF36.1390 |             |        |        |        |        |        | BBM_I00145 | 4 | api+  | 0 | 0 | Valid    |          |                                                               |
| BBOV_I0011260  | TA14870   |             | LmjF31.0180 |             |        |        |        |        |        | BBM_I00150 | 3 |       | 0 | 0 | NA       |          |                                                               |
| BBOV_I0011230  | TA14860   | PF11_0429   | LmjF12.0300 | YOL078W     |        |        |        |        |        | BBM_I00160 | 5 |       | 0 | 0 | Valid    |          |                                                               |
| BBOV_I0011220  | TA14855   | PF11135c    | LmjF36.6020 | YHL013C     |        |        |        | K13719 |        | BBM_I00165 | 5 |       | 1 | 1 | K13719   | K13719   | ubiquitin thioesterase OTU1 [EC:3.1.2.-]                      |
| BBOV_I0011210  | TA14850   | PF11_0427   | LmjF36.0220 | YPR183W     | K00721 | K00721 | K00721 | K00721 | K00721 | BBM_I00170 | 5 |       | 5 | 1 | K00721   | K00721   | dolichol-phosphate mannosyltransferase [EC:2.4.1.83]          |
| BBOV_I0011200  |           |             |             |             |        |        |        |        |        | BBM_I00173 | 1 |       | 0 | 0 | NA       |          |                                                               |
|                |           |             |             |             |        |        |        |        |        | BBM_I00175 | 0 |       | 0 | 0 | NA       |          |                                                               |
| BBOV_I0011180  | TA14830   | PF14_0456   |             | YLR129W     | K14556 |        |        |        | K14556 | BBM_I00180 | 4 | api+  | 2 | 1 | Valid    |          |                                                               |
| BBOV_I0011170  | TA14825   | PF14_0455   |             |             |        |        |        |        |        | BBM_I00185 | 3 | api   | 0 | 0 | Valid    | Valid    | ATM1 putative (not with Plasmodium)                           |
|                |           |             |             |             |        |        |        |        |        | BBM_I00195 | 0 |       | 0 | 0 | NA       |          |                                                               |
| BBOV_I0011150  | TA14820   | PFC0635c    | LmjF28.2500 | YOL139C     | K03259 | K03259 | K03259 |        | K03259 | BBM_I00200 | 5 |       | 4 | 1 | K03259   | K03259   | translation initiation factor eIF-4E                          |
| BBOV_I0011140  | TA14815   | PFE1310c    |             |             |        |        |        |        |        | BBM_I00205 | 3 | api   | 0 | 0 | Valid    |          |                                                               |
| BBOV_I00111730 | TA16980   |             | LmjF32.2280 | YDR377W     |        |        |        |        | K02139 | BBM_I00210 | 4 |       | 1 | 1 | NA       |          | Cystein Rich Modular Protein, CRMP                            |
|                |           | MAL7P1.92   |             |             |        |        |        |        |        | BBM_I00213 | 1 |       | 0 | 0 | NA       |          | Cystein Rich Modular Protein, CRMP                            |
| BBOV_I00111750 | TA16990   | PFIO570w    | LmjF34.0570 | YLR289W     | K03596 | K03596 |        | K03596 |        | BBM_I00215 | 5 |       | 3 | 1 | K03596   | K03596   | GTP-binding protein LepA                                      |
|                |           |             | LmjF21.1270 |             |        |        |        |        |        | BBM_I00220 | 1 |       | 0 | 0 | NA       |          |                                                               |
| BBOV_I002550   | TA08150   | PF14_0597   | LmjF07.0060 | YOR065W     | K00413 | K00413 | K00413 | K00413 | K00413 | BBM_I00225 | 5 |       | 5 | 1 | K00413   | K00413   | ubiquinol-cytochrome c reductase cytochrome c1 subunit        |
|                |           |             |             |             |        |        |        |        |        | BBM_I00230 | 0 |       | 0 | 0 | NA       | K00134   | glyceraldehyde 3-phosphate dehydrogenase [EC:1.2.1.12], GAPDH |
| BBOV_I002520   | TA08135   |             |             |             |        |        |        |        |        | BBM_I00231 | 2 | piro  | 0 | 0 | Valid    |          |                                                               |
| BBOV_I002510   | TA08130   | PF14_0601   | LmjF35.3250 | YNL290W     | K10756 | K10756 | K10756 | K10756 | K10756 | BBM_I00232 | 5 |       | 5 | 1 | K10756   | K10756   | replication factor C subunit 3/5                              |
| BBOV_I002540   | TA08145   | PF14_0598   | LmjF30.2980 | YGR192C     | K00134 | K00134 | K00134 | K00134 | K00134 | BBM_I00233 | 5 |       | 5 | 1 | K00134   | K00134   | glyceraldehyde 3-phosphate dehydrogenase [EC:1.2.1.12], GAPDH |
|                |           |             |             |             |        |        |        |        |        | BBM_I00235 | 0 |       | 0 | 0 | NA       |          |                                                               |
|                |           |             |             |             |        |        |        |        |        | BBM_I00237 |   |       |   |   | Valid    |          | trRNA, Gly, anticodon GCC                                     |
| BBOV_I002480   | TA08120   | PF10_0045   |             |             |        |        |        |        |        | BBM_I00240 | 3 | api   | 0 | 0 | Valid    |          |                                                               |
| BBOV_I002470   | TA08115   |             |             |             |        |        |        |        |        | BBM_I00245 | 2 | piro  | 0 | 0 | Valid    |          |                                                               |

|                |         |             |             |         |        |        |        |        |        |        |            |   |      |   |   |        |        |                                                  |
|----------------|---------|-------------|-------------|---------|--------|--------|--------|--------|--------|--------|------------|---|------|---|---|--------|--------|--------------------------------------------------|
| BBOV_II002220  | TA08090 | PF14_0031a  | LmjF15.1560 | YLR272C |        |        |        |        | K06677 | K06677 | BBM_I00250 | 5 |      | 2 | 1 | K06677 | K06677 | condensin complex subunit 1                      |
| BBOV_II002370  | TA08040 | PF10_0326   |             |         |        |        |        |        |        |        | BBM_I00255 | 3 | api  | 0 | 0 | Valid  |        |                                                  |
|                |         | TA15320     |             |         |        |        |        |        |        |        | BBM_I00260 | 1 |      | 0 | 0 | NA     |        |                                                  |
|                |         | PFE0095c    |             |         |        |        |        |        |        |        | BBM_I00265 | 1 |      | 0 | 0 | NA     |        |                                                  |
| BBOV_II002390  | TA08030 | MAL13P1.132 | LmjF36.6190 |         | K13110 | K13110 | K13110 |        |        |        | BBM_I00275 | 4 | api+ | 3 | 1 | K13110 | K13110 | microfibrillar-associated protein 1              |
| BBOV_II002340  | TA08065 | PFB0100c    |             |         | K01354 | K01354 |        |        |        |        | BBM_I00280 | 3 | api  | 2 | 1 | Valid  |        |                                                  |
| BBOV_II002240  | TA08080 | PF08_0109   | LmjF07.1120 | YHR200W | K03029 | K03029 | K03029 | K03029 | K03029 |        | BBM_I00285 | 5 |      | 5 | 1 | K03029 | K03029 | 26S proteasome regulatory subunit N10            |
| BBOV_II002330  | TA08070 | MAL8P1.128  | LmjF35.4850 | YGL011C | K02730 | K02730 | K02730 | K02730 | K02730 |        | BBM_I00290 | 5 |      | 5 | 1 | K02730 | K02730 | 20S proteasome subunit alpha 1 [EC:3.4.25.1]     |
| BBOV_II002250  | TA08075 | MAL8P1.125  | LmjF14.1370 | YGR185C | K01866 | K01866 | K01866 | K01866 | K01866 |        | BBM_I00295 | 5 |      | 5 | 1 | K01866 | K01866 | tyrosyl-tRNA synthetase [EC:6.1.1.1]             |
| BBOV_II002230  | TA08085 | PFI0455w    | LmjF06.0260 | YOR048C | K12619 | K12619 | K12619 | K12619 | K12619 |        | BBM_I00300 | 5 |      | 5 | 2 | K12619 | K12619 | XRN2, RAT1, 5'-3' exoribonuclease 2 [EC:3.1.13.- |
| BBOV_II002360  | TA08045 | PFI0490c    | LmjF26.1900 |         |        |        |        |        |        |        | BBM_I00310 | 4 | api+ | 0 | 0 | Valid  |        |                                                  |
| BBOV_II002350  | TA08050 |             |             |         | K12599 | K12599 |        |        |        |        | BBM_I00315 | 2 | piro | 2 | 1 | K12599 | K12599 | antiviral helicase SKI2 [EC:3.6.1.-]             |
|                |         | PF14_0250   | L2743.05    | YJL216C |        |        |        |        | K01187 |        | BBM_I00320 | 3 |      | 1 | 1 | NA     |        |                                                  |
| BBOV_II002410  | TA08020 | PFI0475w    | LmjF34.3860 | YLR147C | K11088 | K11088 | K11088 | K11088 | K11088 |        | BBM_I00325 | 5 |      | 5 | 1 | K11088 | K11088 | small nuclear ribonucleoprotein D3               |
| BBOV_II002420  | TA08015 | PFI0470w    | LmjF31.0030 |         |        |        |        |        |        |        | BBM_I00330 | 4 | api+ | 0 | 0 | Valid  |        |                                                  |
| BBOV_II002430  | TA08010 | MAL13P1.78  |             |         |        |        |        |        |        |        | BBM_I00335 | 3 | api  | 0 | 0 | Valid  |        |                                                  |
|                |         |             |             |         |        |        |        |        |        |        | BBM_I00340 | 0 |      | 0 | 0 | NA     |        |                                                  |
|                |         |             |             |         |        |        |        |        |        |        | BBM_I00345 | 0 |      | 0 | 0 | NA     |        |                                                  |
|                |         | PFI0335w    |             | YMR283C |        |        |        |        | K00777 |        | BBM_I00350 | 2 |      | 1 | 1 | NA     |        |                                                  |
| BBOV_III005490 |         | PFI0420c    | LmjF30.1550 | YFL001W |        |        | K01718 | K06173 | K01855 |        | BBM_I00360 | 4 |      | 3 | 3 | NA     |        |                                                  |
| BBOV_III003660 | TA02570 |             |             |         |        |        |        |        |        |        | BBM_I00365 | 2 | piro | 0 | 0 | Valid  |        |                                                  |
| BBOV_IV003990  | TA16930 | MAL13P1.28  |             | YBL074C | K13205 | K13205 |        |        | K13205 |        | BBM_I00370 | 4 | api+ | 3 | 1 | K13205 | K13205 | A1 cistron-splicing factor AAR2                  |
| BBOV_III003670 | TA02565 |             |             |         |        |        |        |        |        |        | BBM_I00375 | 2 | piro | 0 | 0 | Valid  |        |                                                  |
|                |         |             |             | YER023W |        |        |        |        | K00286 |        | BBM_I00380 | 1 |      | 1 | 1 | NA     |        |                                                  |
| BBOV_III003680 | TA02575 | PF13_0032   |             |         |        |        |        |        |        |        | BBM_I00385 | 3 | api  | 0 | 0 | Valid  |        |                                                  |
|                |         |             |             |         |        |        |        |        |        |        | BBM_I00390 | 0 |      | 0 | 0 | NA     |        |                                                  |
|                |         |             |             |         |        |        |        |        |        |        | BBM_I00395 | 0 |      | 0 | 0 | NA     |        |                                                  |
| BBOV_I004840   |         |             |             |         |        |        |        |        |        |        | BBM_I00400 | 1 |      | 0 | 0 | NA     |        |                                                  |
| BBOV_III004020 | TA02650 | PF13_0036   | LmjF08.0990 |         | K09528 | K09528 | K09528 |        |        |        | BBM_I00405 | 4 | api+ | 3 | 1 | K09528 | K09528 | DnaJ homolog subfamily C member 8                |
| BBOV_III004030 | TA02645 | PFC0255c    | LmjF13.1580 | YGL087C | K10704 | K10704 | K10704 | K10704 | K10704 |        | BBM_I00410 | 5 |      | 5 | 1 | K10704 | K10704 | ubiquitin-conjugating enzyme E2 variant          |
| BBOV_III004040 | TA02640 | PFE0795c    | LmjF25.2030 | YLL010C |        |        |        |        |        |        | BBM_I00415 | 5 |      | 0 | 0 | Valid  |        |                                                  |
| BBOV_III004060 | TA02630 | PF13_0024   |             |         |        |        |        |        |        |        | BBM_I00420 | 3 | api  | 0 | 0 | Valid  |        |                                                  |
|                |         |             |             |         |        |        |        |        |        |        | BBM_I00425 | 0 |      | 0 | 0 | NA     |        |                                                  |
|                |         |             |             |         |        |        |        |        |        |        | BBM_I00430 | 0 |      | 0 | 0 | NA     |        |                                                  |
|                |         |             | LmjF34.2460 |         |        |        |        |        |        |        | BBM_I00435 | 1 |      | 0 | 0 | NA     |        |                                                  |
| BBOV_II004050  | TA09375 | PF10_0041   |             | YKL173W | K12852 |        | K12852 |        | K12853 |        | BBM_I00440 | 4 | api+ | 3 | 2 | Valid  |        |                                                  |
| BBOV_II003870  |         | PF14_0707   |             |         |        |        |        |        |        |        | BBM_I00445 | 2 |      | 0 | 0 | NA     |        |                                                  |
|                |         |             |             |         |        |        |        |        |        |        | BBM_I00450 | 0 |      | 0 | 0 | NA     |        |                                                  |
|                |         |             |             |         |        |        |        |        |        |        | BBM_I00455 | 1 |      | 0 | 0 | NA     |        |                                                  |
|                |         |             |             |         |        |        |        |        |        |        | BBM_I00460 | 0 |      | 0 | 0 | NA     |        |                                                  |
|                |         |             |             |         |        |        |        |        |        |        | BBM_I00465 | 1 |      | 0 | 0 | NA     |        |                                                  |
| BBOV_II003890  | TA09305 | MAL8P1.43   |             |         | K12857 | K12857 | K12857 |        |        |        | BBM_I00470 | 3 | api  | 3 | 1 | K12857 | K12857 | Prp8 binding protein                             |
| BBOV_II003900  | TA09310 | PF13_0033   | LmjF03.0540 | YOR259C | K03064 | K03064 | K03064 | K03064 | K03064 |        | BBM_I00475 | 5 |      | 5 | 1 | K03064 | K03064 | 26S proteasome regulatory subunit T4             |
| BBOV_II003910  |         |             | LmjF22.0290 |         |        |        |        |        |        |        | BBM_I00480 | 2 |      | 0 | 0 | NA     |        |                                                  |
|                |         |             |             |         |        |        |        |        |        |        | BBM_I00485 | 0 |      | 0 | 0 | NA     |        |                                                  |
| BBOV_II003920  |         |             |             | YGL195W |        |        |        |        |        |        | BBM_I00490 | 2 |      | 0 | 0 | NA     |        |                                                  |
| BBOV_II003950  | TA09320 | PFD0930w    | LmjF18.1620 | YMR292W |        |        |        |        |        |        | BBM_I00495 | 5 |      | 0 | 0 | Valid  |        |                                                  |
|                |         |             |             |         |        |        |        |        |        |        | BBM_I00500 | 0 |      | 0 | 0 | NA     |        |                                                  |
|                |         |             |             |         |        |        |        |        |        |        | BBM_I00505 | 0 |      | 0 | 0 | NA     |        |                                                  |
| BBOV_II003970  | TA09325 | MAL13P1.151 |             | YBR156C |        |        |        |        |        |        | BBM_I00510 | 4 | api+ | 0 | 0 | Valid  |        |                                                  |
| BBOV_II003980  | TA09330 | PF10_0035   |             |         |        |        |        |        |        |        | BBM_I00515 | 3 | api  | 0 | 0 | Valid  |        |                                                  |
|                |         |             | LmjF30.0990 |         |        |        |        |        |        |        | BBM_I00520 | 1 |      | 0 | 0 | NA     |        |                                                  |
|                |         |             |             |         |        |        |        |        |        |        | BBM_I00525 | 0 |      | 0 | 0 | NA     |        |                                                  |
|                |         |             | LmjF26.2660 |         |        |        |        |        |        |        | BBM_I00530 | 1 |      | 0 | 0 | NA     |        |                                                  |

|               |         |             |             |           |        |        |        |        |        |            |   |      |   |   |        |        |                                                              |
|---------------|---------|-------------|-------------|-----------|--------|--------|--------|--------|--------|------------|---|------|---|---|--------|--------|--------------------------------------------------------------|
| BBOV_I004000  | TA09340 | PFD0530c    |             |           |        |        |        |        |        | BBM_I00535 | 3 | api  | 0 | 0 | Valid  |        |                                                              |
| BBOV_I004010  | TA09345 | PF10_0036   | LmjF13.0260 | YHR013C   | K00670 | K00670 | K00670 | K00670 | K00670 | BBM_I00540 | 5 |      | 5 | 1 | K00670 | K00670 | peptide alpha-N-acetyltransferase [EC:2.3.1.88]              |
| BBOV_I004020  | TA09350 | PF10_0038   | LmjF28.1030 | YHL015W   | K02969 | K02969 | K02969 | K02969 | K02969 | BBM_I00545 | 5 |      | 5 | 1 | K02969 | K02969 | small subunit ribosomal protein S20e                         |
| BBOV_I004030  | TA09355 | PF10_0039   |             | YBR275C   |        |        |        |        | K11118 | BBM_I00555 | 4 | api+ | 1 | 1 | Valid  |        |                                                              |
| BBOV_I004040  | TA09370 | PF10_0040   |             |           |        |        |        |        |        | BBM_I00560 | 3 | api  | 0 | 0 | Valid  |        |                                                              |
| BBOV_I004070  | TA02625 | PF13_0025   |             |           |        |        |        |        |        | BBM_I00565 | 3 | api  | 0 | 0 | Valid  |        |                                                              |
| BBOV_I004090  | TA02615 | PF13_0026   |             |           |        |        |        |        |        | BBM_I00570 | 3 | api  | 0 | 0 | Valid  |        |                                                              |
| BBOV_I004100  | TA02610 | PF13_0034   | LmjF21.1340 | YPR036W   | K02144 | K02144 | K02144 | K02144 | K02144 | BBM_I00575 | 5 |      | 5 | 1 | K02144 | K02144 | V-type H+-transporting ATPase 54 kD subunit [EC:3.6.3.14]    |
| BBOV_I004110  | TA02605 | MAL13P1.34  |             |           |        |        |        |        |        | BBM_I00580 | 3 | api  | 0 | 0 | Valid  |        |                                                              |
| BBOV_I004120  | TA02600 | MAL13P1.35  |             |           |        |        |        |        |        | BBM_I00585 | 3 | api  | 0 | 0 | Valid  |        |                                                              |
| BBOV_I004170  | TA02595 | MAL13P1.36  | P131.03     | YOL142W   | K03681 |        |        |        | K03681 | BBM_I00590 | 5 |      | 2 | 1 | K03681 | K03681 | exosome complex component RRP40                              |
| BBOV_I004010  | TA02655 |             |             | YDR449C   | K14557 | K14557 |        |        | K14557 | BBM_I00595 | 3 |      | 3 | 1 | K14557 | K14557 | UTP6, U3 small nucleolar RNA-associated protein 6            |
|               | TA02660 | PFC0250c    | LmjF36.5270 |           |        | K01741 | K01741 |        |        | BBM_I00600 | 3 |      | 2 | 1 | NA     |        |                                                              |
| BBOV_I0011410 | TA03310 | PF13_0040   |             |           | K03040 | K03040 | K03040 |        |        | BBM_I00605 | 3 | api  | 3 | 1 | K03040 | K03040 | DNA-directed RNA polymerase subunit alpha [EC:2.7.7.6]       |
| BBOV_I0011420 | TA15165 |             | LmjF21.0080 |           |        |        |        |        |        | BBM_I00610 | 3 |      | 0 | 0 | NA     |        |                                                              |
| BBOV_I0011430 | TA15160 | PF13_0041   |             |           |        |        |        |        |        | BBM_I00615 | 3 | api  | 0 | 0 | Valid  |        |                                                              |
|               | TA10695 |             |             |           |        |        |        |        |        | BBM_I00620 | 1 |      | 0 | 0 | NA     |        |                                                              |
| BBOV_I0011460 | TA15140 | MAL13P1.37  |             |           |        |        |        |        |        | BBM_I00625 | 3 | api  | 0 | 0 | Valid  |        |                                                              |
| BBOV_I0011470 | TA15135 | PF13_0042   | LmjF22.0530 | YLR016C   | K13108 | K13108 | K13108 |        | K13108 | BBM_I00630 | 5 |      | 4 | 1 | K13108 | K13108 | smad nuclear-interacting protein 1                           |
| BBOV_I0005690 | TA12880 | PF14_0717   | LmjF25.0540 | YPR129W   |        |        |        |        |        | BBM_I00635 | 5 |      | 0 | 0 | Valid  |        |                                                              |
| BBOV_I0003390 | TA07440 | PF08_0135   | LmjF26.1250 | YGR145W   |        |        |        |        | K14788 | BBM_I00640 | 5 |      | 1 | 1 | K14788 | K14788 | NOL10, ENP2, ribosome biogenesis protein ENP2                |
| BBOV_I0003380 | TA07445 | PF14_0699   |             |           |        |        |        |        |        | BBM_I00645 | 3 | api  | 0 | 0 | Valid  | Valid  | TBC domain containing protein                                |
|               |         |             |             |           |        |        |        |        |        | BBM_I00646 |   |      |   |   | Valid  |        | 5S ribosomal rRNA                                            |
| BBOV_I0000220 |         | PF10_0124   |             | YMR277W   |        |        |        |        | K01090 | BBM_I00655 | 3 |      | 1 | 1 | NA     |        |                                                              |
| BBOV_I0010560 | TA15005 |             | LmjF16.0190 | YKR063C   |        |        |        |        |        | BBM_I00660 | 4 |      | 0 | 0 | NA     |        |                                                              |
|               |         |             |             |           |        |        |        |        |        | BBM_I00665 | 0 |      | 0 | 0 | NA     |        |                                                              |
| BBOV_I0004710 | TA13420 | PF10_0188   | LmjF17.1230 |           |        |        |        |        |        | BBM_I00670 | 4 | api+ | 0 | 0 | Valid  |        |                                                              |
| BBOV_IV000160 | TA15975 | MAL13P1.274 | LmjF18.0150 | YGR123C   | K04460 | K04460 | K04460 | K04460 | K04460 | BBM_I00700 | 5 |      | 5 | 1 | K04460 | K04460 | protein phosphatase 5 [EC:3.1.3.16]                          |
| BBOV_IV000150 | TA15970 | MAL13P1.275 |             |           |        |        |        |        |        | BBM_I00705 | 3 | api  | 0 | 0 | Valid  |        |                                                              |
| BBOV_I0004720 | TA13415 | PF13_0296   | LmjF35.4090 | YNL138W-A | K12832 | K12832 | K12832 | K12832 | K12832 | BBM_I00710 | 5 |      | 5 | 1 | K12832 | K12832 | splicing factor 3B subunit 5                                 |
|               |         |             |             |           |        |        |        |        |        | BBM_I00715 | 0 |      | 0 | 0 | NA     |        |                                                              |
| BBOV_I0004730 | TA13400 | PF07_0037   |             |           |        |        |        |        |        | BBM_I00720 | 3 | api  | 0 | 0 | Valid  |        |                                                              |
| BBOV_I0005710 | TA12875 | PF10_0098   |             |           |        |        |        |        |        | BBM_I00725 | 3 | api  | 0 | 0 | Valid  |        |                                                              |
|               |         | PFL1380w    |             | YOL111C   |        |        |        |        |        | BBM_I00730 | 2 |      | 0 | 0 | NA     |        |                                                              |
| BBOV_I0005700 |         |             |             | YGR217W   |        |        |        |        |        | BBM_I00735 | 2 |      | 0 | 0 | NA     |        |                                                              |
|               |         |             |             |           |        |        |        |        |        | BBM_I00737 |   |      |   |   | Valid  |        | 5S ribosomal rRNA                                            |
| BBOV_I0003490 | TA07375 | PF14_0700   |             |           | K09529 | K09529 |        |        |        | BBM_I00740 | 3 | api  | 2 | 1 | Valid  |        |                                                              |
| BBOV_I0003480 | TA07380 | PF10630w    | LmjF32.0390 | YOR261C   | K03038 | K03038 | K03038 | K03038 | K03038 | BBM_I00745 | 5 |      | 5 | 1 | K03038 | K03038 | 26S proteasome regulatory subunit N8                         |
| BBOV_I0003470 | TA07385 | PF10635c    |             |           |        |        |        |        |        | BBM_I00750 | 3 | api  | 0 | 0 | Valid  |        |                                                              |
| BBOV_I0003460 | TA07390 | PF11_0106   | LmjF21.0730 | YPL249C-A | K02920 | K02920 | K02920 | K02920 | K02920 | BBM_I00755 | 5 |      | 5 | 1 | K02920 | K02920 | large subunit ribosomal protein L36e                         |
| BBOV_I0003450 | TA07400 | PF11_0105   | LmjF30.0480 | YBR247C   | K14797 | K14797 | K14797 | K14797 | K14797 | BBM_I00760 | 5 |      | 5 | 1 | K14797 | K14797 | ENP1, BYSL, essential nuclear protein 1                      |
|               |         |             | LmjF05.0440 |           |        |        |        |        |        | BBM_I00765 | 1 |      | 0 | 0 | NA     |        |                                                              |
|               |         |             |             |           |        |        |        |        |        | BBM_I00770 | 0 |      | 0 | 0 | NA     |        |                                                              |
| BBOV_I0003440 | TA07410 | PF11_0086   | LmjF36.6060 | YGR162W   |        |        |        |        | K03260 | BBM_I00780 | 5 |      | 1 | 1 | K03260 | K03260 | translation initiation factor eIF-4F                         |
| BBOV_I0003430 | TA07415 | MAL7P1.20   |             |           | K02836 | K02836 |        |        |        | BBM_I00785 | 3 | api  | 2 | 1 | Valid  |        |                                                              |
| BBOV_I0003420 | TA07420 | MAL7P1.114  |             | YGR286C   |        |        |        |        | K01012 | BBM_I00790 | 4 | api+ | 1 | 1 | Valid  |        |                                                              |
|               |         | PFB0615c    |             |           |        |        |        |        |        | BBM_I00795 | 1 |      | 0 | 0 | NA     |        |                                                              |
|               |         |             |             |           |        |        |        |        |        | BBM_I00800 | 0 |      | 0 | 0 | NA     |        |                                                              |
|               | TA10965 | PFF1280w    |             |           |        |        |        |        |        | BBM_I00805 | 2 |      | 0 | 0 | NA     |        |                                                              |
|               |         |             |             |           |        |        |        |        |        | BBM_I00810 | 0 |      | 0 | 0 | NA     |        |                                                              |
| BBOV_I0006230 | TA13995 | PF11_0048   |             |           | K03115 | K03115 | K03115 |        |        | BBM_I00815 | 3 | api  | 3 | 1 | K03115 | K03115 | CSNK2B, casein kinase II subunit beta                        |
| BBOV_I0005510 | TA13565 | PFI0910w    | LmjF24.1530 | YMR190C   | K10901 | K03654 | K01509 | K10901 | K10901 | BBM_I00820 | 5 |      | 5 | 3 | NA     |        |                                                              |
| BBOV_I0005520 | TA13560 | PF14_0174   | LmjF21.1760 | YLR175W   | K11131 | K11131 | K11131 | K11131 | K11131 | BBM_I00825 | 5 |      | 5 | 1 | K11131 | K11131 | DKC1, NOLA4, CBF5, H/ACA ribonucleoprotein complex subunit 4 |
|               |         |             |             |           |        |        |        |        |        | BBM_I00830 | 0 |      | 0 | 0 | NA     |        |                                                              |

|               |         |             |             |         |        |        |        |        |        |            |   |      |   |   |        |        |                                                                      |
|---------------|---------|-------------|-------------|---------|--------|--------|--------|--------|--------|------------|---|------|---|---|--------|--------|----------------------------------------------------------------------|
| BBOV_I005540  | TA13550 | PF14_0171   | LmjF32.3890 | YNL223W |        |        |        | K08342 | K08342 | BBM_I00840 | 5 |      | 3 | 1 | K08342 | K08342 | autophagy-related protein 4 [EC:3.4.22.-]                            |
| BBOV_I005550  | TA13545 | PF14_0175   |             |         |        |        |        |        |        | BBM_I00845 | 3 | api  | 0 | 0 | Valid  |        |                                                                      |
|               |         |             |             |         |        |        |        |        |        | BBM_I00850 | 0 |      | 0 | 0 | NA     |        |                                                                      |
|               |         |             |             |         |        |        |        |        |        | BBM_I00855 | 0 |      | 0 | 0 | NA     |        |                                                                      |
|               |         |             |             |         |        |        |        |        |        | BBM_I00860 | 0 |      | 0 | 0 | NA     |        |                                                                      |
| BBOV_I005560  | TA13540 |             |             |         |        |        |        |        |        | BBM_I00865 | 2 | piro | 0 | 0 | Valid  |        |                                                                      |
| BBOV_I005570  | TA13530 | MAL13P1.206 | LmjF10.1300 | YBR296C | K14640 | K14640 | K14640 |        | K14640 | BBM_I00870 | 5 |      | 4 | 1 | K14640 | K14640 | solute carrier family 20                                             |
| BBOV_I005500  | TA13525 | MAL13P1.103 |             |         |        |        |        |        |        | BBM_I00875 | 3 | api  | 0 | 0 | Valid  |        |                                                                      |
| BBOV_I005710  | TA13660 | PF13_0109   | LmjF13.0940 | YDR120C | K00555 | K00555 | K00555 |        | K00555 | BBM_I00880 | 5 |      | 4 | 1 | K00555 | K00555 | tRNA (guanine-N2-)-methyltransferase [EC:2.1.1.32]                   |
| BBOV_I005700  | TA13655 | PFA_0310c   | LT.01       | YGL167C | K01537 | K01537 | K01537 | K05853 | K01537 | BBM_I00885 | 5 |      | 5 | 2 | K01537 | K01537 | Ca2+-transporting ATPase [EC:3.6.3.8]                                |
| BBOV_I002940  | TA20340 | PF10_0294   | LmjF36.2830 | YER013W | K12818 | K12818 | K12818 |        | K12818 | BBM_I00890 | 5 |      | 4 | 1 | K12818 | K12818 | ATP-dependent RNA helicase DHX8/PRP22 [EC:3.6.4.13]                  |
| BBOV_I002930  | TA20335 |             |             |         |        |        |        |        |        | BBM_I00895 | 2 | piro | 0 | 0 | Valid  |        |                                                                      |
|               |         | PF0215w     |             |         |        |        |        |        |        | BBM_I00900 | 1 |      | 0 | 0 | NA     |        |                                                                      |
|               |         |             |             |         |        |        |        |        |        | BBM_I00905 | 0 |      | 0 | 0 | NA     |        |                                                                      |
|               | TA14405 | PF14_0020   |             |         |        |        |        | K00866 | K00866 | BBM_I00910 | 2 |      | 2 | 1 | NA     |        |                                                                      |
| BBOV_I002910  | TA20305 | PF07_0057   | LmjF24.0210 | YGL043W | K03145 | K03145 | K03145 |        | K03145 | BBM_I00915 | 5 |      | 4 | 1 | K03145 | K03145 | transcription elongation factor S-II                                 |
|               | TA10300 |             |             |         |        |        |        |        |        | BBM_I00920 | 1 |      | 0 | 0 | NA     |        |                                                                      |
| BBOV_I002890  |         | PF08_0041   |             | YLR186W | K14568 |        | K14568 |        | K14568 | BBM_I00925 | 3 |      | 3 | 1 | K14568 | K14568 | EMG1, NEP1, essential for mitotic growth 1                           |
| BBOV_I002880  | TA20285 |             |             | YIL034C |        |        |        |        | K10365 | BBM_I00930 | 3 |      | 1 | 1 | NA     |        |                                                                      |
| BBOV_I002870  | TA20280 | PFL2195w    |             | YLR206W |        |        |        |        | K12471 | BBM_I00935 | 4 | api+ | 1 | 1 | Valid  |        |                                                                      |
| BBOV_I002860  | TA20275 |             |             |         |        |        |        |        |        | BBM_I00940 | 2 | piro | 0 | 0 | Valid  |        |                                                                      |
|               |         |             | LmjF21.1500 |         |        |        |        |        |        | BBM_I00945 | 1 |      | 0 | 0 | NA     |        |                                                                      |
| BBOV_I002850  | TA20265 | PF10_0272   | LmjF32.3130 | YOR063W | K02925 | K02925 | K02925 | K02925 | K02925 | BBM_I00950 | 5 |      | 5 | 1 | K02925 | K02925 | large subunit ribosomal protein L3e                                  |
|               |         |             |             |         |        |        |        |        |        | BBM_I00955 | 0 |      | 0 | 0 | NA     |        |                                                                      |
| BBOV_I002900  |         | PFC0905c    |             |         |        |        |        |        |        | BBM_I00960 | 2 |      | 0 | 0 | NA     |        |                                                                      |
| BBOV_I002780  |         | PF10_0273   |             |         |        |        |        |        |        | BBM_I00965 | 2 |      | 0 | 0 | NA     |        |                                                                      |
| BBOV_I002790  | TA20240 | PF10_0274   | LmjF36.2650 | YML014W |        |        |        |        |        | BBM_I00967 | 5 |      | 0 | 0 | Valid  |        |                                                                      |
| BBOV_I002800  |         | PF10_0277   | LmjF35.1820 | YKL172W | K14823 |        | K14823 | K14823 | K14823 | BBM_I00970 | 4 |      | 4 | 1 | K14823 | K14823 | EBP2, EBNA1BP2, rRNA-processing protein EBP2                         |
| BBOV_I002810  |         | PF10_0278   | LmjF26.0010 | YKR081C | K14847 |        |        | K14847 | K14847 | BBM_I00975 | 4 |      | 3 | 1 | K14847 | K14847 | RPF2, ribosome production factor 2                                   |
| BBOV_I002760  | TA20230 |             |             |         |        |        |        |        |        | BBM_I00980 | 2 | piro | 0 | 0 | Valid  |        |                                                                      |
|               | TA20220 |             |             |         |        |        |        |        |        | BBM_I00985 | 1 |      | 0 | 0 | NA     |        |                                                                      |
| BBOV_I002750  |         | PF10_0282   |             |         |        |        |        |        |        | BBM_I00990 | 2 |      | 0 | 0 | NA     |        |                                                                      |
|               |         |             |             |         |        |        |        |        |        | BBM_I00995 | 0 |      | 0 | 0 | NA     |        |                                                                      |
| BBOV_I001640  |         | PF0445w     | LmjF12.0860 |         |        |        |        |        |        | BBM_I00997 | 3 |      | 0 | 0 | NA     | Valid  | hypothetical protein                                                 |
| BBOV_I002740  |         | PF10_0281   |             |         |        |        |        |        |        | BBM_I01000 | 2 |      | 0 | 0 | NA     |        |                                                                      |
| BBOV_I001450  | TA20210 | PF11600w    | LmjF29.0680 | YNL197C |        |        |        |        |        | BBM_I01005 | 5 |      | 0 | 0 | Valid  |        |                                                                      |
|               |         |             |             |         |        |        |        |        |        | BBM_I01007 | 0 |      | 0 | 0 | NA     |        |                                                                      |
| BBOV_I001460  | TA20205 | PF10_0291   |             |         |        |        |        |        |        | BBM_I01010 | 3 | api  | 0 | 0 | Valid  |        |                                                                      |
| BBOV_I001520  | TA20180 | PF14_0372   | LmjF30.0320 | YOR154W |        |        |        |        |        | BBM_I01015 | 5 |      | 0 | 0 | Valid  |        |                                                                      |
| BBOV_I001530  | TA20175 |             |             |         |        |        | K01529 |        |        | BBM_I01017 | 2 | piro | 1 | 1 | Valid  |        |                                                                      |
| BBOV_I0000180 | TA18425 | MAL8P1.300  | LmjF16.1110 | YOL008W |        |        |        |        |        | BBM_I01020 | 5 |      | 0 | 0 | Valid  |        |                                                                      |
| BBOV_I0004900 | TA12180 | PFL1315w    |             | YJL093C |        |        |        |        | K05389 | BBM_I01025 | 4 | api+ | 1 | 1 | Valid  |        |                                                                      |
| BBOV_I0000190 | TA18420 |             | LmjF07.0340 |         |        |        |        | K12823 |        | BBM_I01030 | 3 |      | 1 | 1 | NA     |        |                                                                      |
| BBOV_I0004870 | TA13305 |             |             |         |        |        |        |        |        | BBM_I01035 | 2 | piro | 0 | 0 | Valid  |        |                                                                      |
| BBOV_I0004860 | TA13310 | PFE0375w    | LmjF34.4550 | YNL288W | K12606 | K12606 | K12606 | K12606 | K12606 | BBM_I01040 | 5 |      | 5 | 1 | K12606 | K12606 | CCR4-NOT transcription complex subunit 9                             |
| BBOV_I0004850 | TA13315 | PF10_0084   | LmjF21.1860 | YFL037W | K07375 | K07375 | K07375 | K07375 | K07375 | BBM_I01045 | 5 |      | 5 | 1 | K07375 | K07375 | tubulin beta                                                         |
| BBOV_I0004840 | TA13320 |             |             |         |        |        |        |        |        | BBM_I01050 | 2 | piro | 0 | 0 | Valid  |        |                                                                      |
| BBOV_I0004970 | TA13265 | MAL8P1.33   |             |         |        |        |        |        |        | BBM_I01055 | 3 | api  | 0 | 0 | Valid  |        |                                                                      |
| BBOV_I0004990 | TA13240 | MAL8P1.34   |             |         |        |        |        |        |        | BBM_I01060 | 3 | api  | 0 | 0 | Valid  |        |                                                                      |
| BBOV_I0004830 |         |             |             |         |        |        |        |        |        | BBM_I01065 | 1 |      | 0 | 0 | NA     |        |                                                                      |
| BBOV_IV007280 | TA03485 | PF07_0023   | LmjF32.2960 | YBR202W | K02210 | K02210 | K02210 | K02210 | K02210 | BBM_I01070 | 5 |      | 5 | 1 | K02210 | K02210 | minichromosome maintenance protein 7 (cell division control protein) |
|               |         |             | LmjF35.0300 |         |        |        |        |        |        | BBM_I01075 | 1 |      | 0 | 0 | NA     |        |                                                                      |
|               |         |             |             |         |        |        |        |        |        | BBM_I01080 | 0 |      | 0 | 0 | NA     |        |                                                                      |
| BBOV_IV007290 | TA03495 | PFL0925w    | LmjF17.0930 | YIL159W |        |        |        |        |        | BBM_I01085 | 5 |      | 0 | 0 | Valid  |        |                                                                      |

|                |         |             |             |           |        |        |        |        |        |            |   |      |   |   |        |        |                                                                    |
|----------------|---------|-------------|-------------|-----------|--------|--------|--------|--------|--------|------------|---|------|---|---|--------|--------|--------------------------------------------------------------------|
| BBOV_IV007310  | TA03505 | PFB0130w    | LmjF15.1020 | YBR003W   |        |        |        |        | K05355 | BBM_I01090 | 5 |      | 1 | 1 | K05355 | K05355 | hexaprenyl-diphosphate synthase [EC:2.5.1.82 2.5.1.83]             |
| BBOV_IV007530  | TA03610 | PFIO345w    |             |           |        |        |        |        |        | BBM_I01095 | 3 | api  | 0 | 0 | Valid  | Valid  | TBC domain containing protein                                      |
|                | TA11590 |             |             |           |        |        |        |        |        | BBM_I01100 | 1 |      | 0 | 0 | NA     |        |                                                                    |
|                | TA03605 | PFIO280c    | LmjF33.0295 | YNR007C   |        | K08343 |        |        | K08343 | BBM_I01105 | 4 |      | 2 | 1 | NA     |        |                                                                    |
|                |         |             |             |           |        |        |        |        |        | BBM_I01107 |   |      |   |   | Valid  | Valid  | tRNA, Ser, anticodon GGA                                           |
|                |         |             |             |           |        |        |        |        |        | BBM_I01108 |   |      |   |   | Valid  | Valid  | tRNA, Ser, anticodon CGA                                           |
| BBOV_IV007560  | TA03600 | PFD0555c    |             |           |        |        |        |        |        | BBM_I01110 | 3 | api  | 0 | 0 | Valid  |        |                                                                    |
| BBOV_IV007670  |         |             |             |           |        |        |        |        |        | BBM_I01115 | 1 |      | 0 | 0 | NA     |        |                                                                    |
| BBOV_IV007660  | TA03565 | PFD0565c    |             |           |        | K01509 |        |        |        | BBM_I01120 | 3 | api  | 1 | 1 | Valid  |        |                                                                    |
| BBOV_IV007680  | TA03570 | PF10_0361   |             |           |        |        |        |        |        | BBM_I01125 | 3 | api  | 0 | 0 | Valid  |        |                                                                    |
|                |         |             | LmjF25.2060 |           |        |        |        |        |        | BBM_I01130 | 1 |      | 0 | 0 | NA     |        |                                                                    |
| BBOV_IV007690  | TA03575 | PF13_0261   | LmjF25.1390 | YLR243W   | K06883 | K06883 |        | K06883 | K06883 | BBM_I01135 | 5 |      | 4 | 1 | K06883 | K06883 |                                                                    |
| BBOV_IV000470  | TA19900 | PF08_0098   | LmjF36.4530 | YGL119W   | K08869 | K08869 | K08869 |        | K08869 | BBM_I01140 | 5 |      | 4 | 1 | K08869 | K08869 | aarF domain-containing kinase                                      |
| BBOV_IV000480  | TA19905 | MAL8P1.110  |             |           |        |        |        |        |        | BBM_I01145 | 3 | api  | 0 | 0 | Valid  |        |                                                                    |
| BBOV_IV000490  | TA19910 | PF08_0099   | LmjF09.0750 | YGR037C   |        | K08762 |        |        |        | BBM_I01150 | 5 |      | 1 | 1 | K08762 | K08762 | diazepam-binding inhibitor (GABA receptor modulator,               |
| BBOV_IV000500  | TA19920 | PFF0670w    |             |           |        |        |        |        |        | BBM_I01155 | 3 | api  | 0 | 0 | Valid  |        |                                                                    |
| BBOV_IV007040  | TA03340 | MAL7P1.88   | LmjF09.0870 |           |        |        |        |        |        | BBM_I01160 | 4 | api+ | 0 | 0 | Valid  |        |                                                                    |
| BBOV_IV007050  | TA03335 | PFE0090w    | LmjF36.2500 | YML102W   |        |        | K10751 | K10751 | K10751 | BBM_I01165 | 5 |      | 3 | 1 | K10751 | K10751 | chromatin assembly factor 1 subunit B                              |
| BBOV_IV007060  | TA03330 | PFD0590c    | LmjF16.1540 | YNL102W   | K02320 | K02320 | K02320 | K02320 | K02320 | BBM_I01170 | 5 |      | 5 | 1 | K02320 | K02320 | DNA polymerase alpha subunit A [EC:2.7.7.7]                        |
|                |         |             |             |           |        |        |        |        |        | BBM_I01175 | 0 |      | 0 | 0 | NA     |        |                                                                    |
| BBOV_IV007070  | TA03320 | PF07_0066   |             | YKL214C   |        |        |        |        |        | BBM_I01180 | 4 | api+ | 0 | 0 | Valid  |        |                                                                    |
| BBOV_IV007080  | TA20525 | PFD0600c    |             | YNR036C   |        |        |        |        |        | BBM_I01185 | 4 | api+ | 0 | 0 | Valid  |        |                                                                    |
| BBOV_IV007090  | TA20520 | PFE1340w    |             | YAR002C-A |        |        |        |        |        | BBM_I01195 | 4 | api+ | 0 | 0 | Valid  |        |                                                                    |
| BBOV_IV007100  | TA20515 |             | LmjF33.2700 | YEL032W   | K02541 | K02541 |        | K02541 | K02541 | BBM_I01200 | 4 |      | 4 | 1 | K02541 | K02541 | minichromosome maintenance protein 3                               |
| BBOV_IV007110  | TA20510 | PFE1350c    | P1105.09    | YDR092W   | K10580 | K10580 | K10580 |        | K10580 | BBM_I01205 | 5 |      | 4 | 1 | K10580 | K10580 | ubiquitin-conjugating enzyme E2 N [EC:6.3.2.19]                    |
| BBOV_IV007120  | TA20505 | PF10_0130   | LmjF26.1040 |           |        |        |        |        |        | BBM_I01210 | 4 | api+ | 0 | 0 | Valid  |        |                                                                    |
|                |         | PF10_0226   |             |           |        |        |        |        |        | BBM_I01213 | 1 |      | 0 | 0 | NA     |        |                                                                    |
|                |         |             |             |           |        |        |        |        |        | BBM_I01215 | 0 |      | 0 | 0 | NA     |        |                                                                    |
| BBOV_III004820 | TA13325 | PF14_0316   | LmjF28.2280 | YNL088W   | K03164 | K03164 | K03164 | K03164 | K03164 | BBM_I01220 | 5 |      | 5 | 1 | K03164 | K03164 | DNA topoisomerase II [EC:5.99.1.3]                                 |
| BBOV_III000150 | TA18430 | PF10_0253b  |             |           |        |        |        |        |        | BBM_I01225 | 3 | api  | 0 | 0 | Valid  |        |                                                                    |
| BBOV_III000140 |         | PF10_0253   |             |           |        |        |        |        |        | BBM_I01230 | 2 |      | 0 | 0 | NA     |        |                                                                    |
|                | TA13390 | PF11_0355   |             |           |        |        |        |        |        | BBM_I01235 | 2 |      | 0 | 0 | NA     |        |                                                                    |
|                | TA18435 | PFE0880c    |             |           |        | K10365 |        |        |        | BBM_I01240 | 2 |      | 1 | 1 | NA     |        |                                                                    |
| BBOV_III000130 | TA18445 | PFE0275w    |             |           |        |        |        |        |        | BBM_I01245 | 3 | api  | 0 | 0 | Valid  |        |                                                                    |
| BBOV_III000120 |         | PF10_0252   | LmjF23.0700 | YLL009C   | K02260 |        | K02260 |        | K02260 | BBM_I01250 | 4 |      | 3 | 1 | K02260 | K02260 | cytochrome c oxidase subunit XVII assembly protein                 |
|                |         |             |             |           |        |        |        |        |        | BBM_I01255 | 0 |      | 0 | 0 | NA     |        |                                                                    |
| BBOV_I000160   |         |             |             |           |        |        |        |        |        | BBM_I01260 | 1 |      | 0 | 0 | NA     |        |                                                                    |
|                |         |             |             |           |        |        |        |        |        | BBM_I01265 | 0 |      | 0 | 0 | NA     |        |                                                                    |
|                |         |             |             |           |        |        |        |        |        | BBM_I01270 | 0 |      | 0 | 0 | NA     |        |                                                                    |
| BBOV_I000080   | TA17425 | MAL13P1.231 | LmjF11.1050 | YLR378C   | K10956 | K10956 | K10956 | K10956 | K10956 | BBM_I01275 | 5 |      | 5 | 1 | K10956 | K10956 | protein transport protein SEC61 subunit alpha                      |
|                |         |             | LmjF35.3370 | YBR165W   |        |        |        |        |        | BBM_I01280 | 2 |      | 0 | 0 | NA     |        |                                                                    |
| BBOV_III008330 | TA10265 | MAL8P1.100  |             |           |        |        |        |        |        | BBM_I01285 | 3 | api  | 0 | 0 | Valid  |        |                                                                    |
| BBOV_III008320 | TA10270 | PFL2180w    | LmjF29.0030 | YGR220C   | K02906 | K02906 |        |        |        | BBM_I01290 | 5 |      | 2 | 1 | K02906 | K02906 | large subunit ribosomal protein L3                                 |
| BBOV_III008310 | TA10275 | MAL8P1.99   | LmjF22.0820 |           | K03978 | K03978 |        |        |        | BBM_I01295 | 4 | api+ | 2 | 1 | Valid  |        |                                                                    |
| BBOV_III008300 | TA10280 | PF08_0113   | LmjF23.1510 | YOR270C   | K02154 | K02154 | K02154 | K02154 | K02154 | BBM_I01300 | 5 |      | 5 | 1 | K02154 | K02154 | V-type H <sup>+</sup> -transporting ATPase subunit I [EC:3.6.3.14] |
| BBOV_III008290 | TA10285 | PF08_0112   |             |           |        |        |        |        |        | BBM_I01305 | 3 | api  | 0 | 0 | Valid  |        |                                                                    |
| BBOV_III008280 | TA10290 | MAL8P1.131  | LmjF06.0720 | YNL107W   | K11341 | K11341 | K11341 |        | K11341 | BBM_I01310 | 5 |      | 4 | 1 | K11341 | K11341 | YEATS domain-containing protein 4                                  |
|                |         |             |             |           |        |        |        |        |        | BBM_I01320 | 0 |      | 0 | 0 | NA     |        |                                                                    |
| BBOV_III008260 |         |             |             |           |        |        |        |        |        | BBM_I01325 | 1 |      | 0 | 0 | NA     |        |                                                                    |
|                |         |             |             |           |        |        |        |        |        | BBM_I01335 | 0 |      | 0 | 0 | NA     |        |                                                                    |
| BBOV_III008250 |         |             |             |           |        |        |        |        |        | BBM_I01340 | 1 |      | 0 | 0 | NA     |        |                                                                    |
|                |         |             |             |           |        |        |        |        |        | BBM_I01345 | 0 |      | 0 | 0 | NA     |        |                                                                    |
| BBOV_III008170 | TA10355 | PF10_0099   | LmjF09.1240 | YLR430W   |        |        |        |        |        | BBM_I01355 | 5 |      | 0 | 0 | Valid  |        |                                                                    |
| BBOV_III008180 | TA10350 |             |             |           |        |        |        |        |        | BBM_I01360 | 2 | piro | 0 | 0 | Valid  |        |                                                                    |

|                |         |             |             |         |        |        |        |        |        |            |   |      |   |   |        |        |                                                           |
|----------------|---------|-------------|-------------|---------|--------|--------|--------|--------|--------|------------|---|------|---|---|--------|--------|-----------------------------------------------------------|
| BBOV_III008190 | TA10345 |             |             |         |        |        |        |        |        | BBM_I01365 | 2 | piro | 0 | 0 | Valid  |        |                                                           |
| BBOV_IV001590  | TA05215 | MAL13P1.360 |             |         |        |        |        |        |        | BBM_I01370 | 3 | api  | 0 | 0 | Valid  |        |                                                           |
|                |         |             | LmjF32.1560 |         |        |        |        |        |        | BBM_I01375 | 1 |      | 0 | 0 | NA     |        |                                                           |
| BBOV_IV001580  |         | PF11_0324   |             |         |        |        |        |        |        | BBM_I01380 | 2 |      | 0 | 0 | NA     |        |                                                           |
| BBOV_IV001570  | TA05210 | PF13_0126   |             |         |        |        |        |        |        | BBM_I01385 | 3 | api  | 0 | 0 | Valid  |        |                                                           |
|                |         |             |             | YOR374W |        |        |        |        | K00128 | BBM_I01390 | 1 |      | 1 | 1 | NA     |        |                                                           |
|                | TA05270 |             |             |         |        |        |        |        |        | BBM_I01395 | 1 |      | 0 | 0 | NA     |        |                                                           |
| BBOV_IV001550  | TA05190 | MAL13P1.25  |             | YDR257C |        |        |        |        | K05302 | BBM_I01400 | 4 | api+ | 1 | 1 | Valid  |        |                                                           |
|                |         |             |             |         |        |        |        |        |        | BBM_I01405 | 0 |      | 0 | 0 | NA     |        |                                                           |
| BBOV_IV001530  | TA05180 |             |             |         |        |        |        |        |        | BBM_I01410 | 2 | piro | 0 | 0 | Valid  |        |                                                           |
| BBOV_IV001520  | TA05175 | MAL13P1.22  | LmjF30.3440 | YDL164C | K10747 | K10747 | K10747 | K10747 | K10747 | BBM_I01415 | 5 |      | 5 | 1 | K10747 | K10747 | DNA ligase 1 [EC:6.5.1.1]                                 |
| BBOV_I005020   | TA05170 | MAL13P1.23  |             | YOR334W |        |        |        |        |        | BBM_I01425 | 4 | api+ | 0 | 0 | Valid  |        |                                                           |
| BBOV_I005090   | TA05165 | PF10715w    | LmjF20.0880 | YKL160W |        |        |        |        |        | BBM_I01430 | 5 |      | 0 | 0 | Valid  |        |                                                           |
| BBOV_I005080   | TA05130 | MAL13P1.20  |             |         |        |        |        |        |        | BBM_I01435 | 3 | api  | 0 | 0 | Valid  |        |                                                           |
| BBOV_II004180  | TA05125 | PF10720w    |             |         |        |        |        |        |        | BBM_I01440 | 3 | api  | 0 | 0 | Valid  |        |                                                           |
| BBOV_I005060   | TA05120 | PF10740c    | LmjF02.0390 | YDL064W |        | K10577 | K10577 | K10577 | K10577 | BBM_I01445 | 5 |      | 4 | 1 | K10577 | K10577 | ubiquitin-conjugating enzyme E2 I [EC:6.3.2.19]           |
| BBOV_I004980   | TA05115 | PF10735c    | LmjF36.5380 | YDL085W | K03885 | K03885 | K03885 | K03885 | K03885 | BBM_I01450 | 5 |      | 5 | 1 | K03885 | K03885 | NADH dehydrogenase [EC:1.6.99.3]                          |
|                | TA05110 |             |             | YKL020C |        |        |        |        | K06867 | BBM_I01455 | 2 |      | 1 | 1 | NA     |        |                                                           |
|                |         |             |             |         |        |        |        |        |        | BBM_I01460 | 0 |      | 0 | 0 | NA     |        |                                                           |
| BBOV_I005000   | TA05105 | PFE0385w    |             | YNL094W |        |        |        |        |        | BBM_I01465 | 4 | api+ | 0 | 0 | Valid  |        |                                                           |
| BBOV_I004950   | TA05100 | PFE0410w    | LmjF06.1280 | YOR307C |        |        |        |        | K00230 | BBM_I01470 | 5 |      | 1 | 1 | K00230 | K00230 | protoporphyrinogen oxidase [EC:1.3.3.4]                   |
| BBOV_I004940   | TA05090 | PFE0420c    | LmjF26.0740 |         |        |        |        |        |        | BBM_I01480 | 4 | api+ | 0 | 0 | Valid  |        |                                                           |
| BBOV_I004920   | TA05085 | PFE0430w    | LmjF08.0080 |         |        | K12811 | K12811 | K12811 |        | BBM_I01485 | 4 | api+ | 3 | 1 | K12811 | K12811 | ATP-dependent RNA helicase DDX46/PRP5 [EC:3.6.4.13]       |
|                |         | PFE0425w    |             |         |        |        |        |        |        | BBM_I01490 | 1 |      | 0 | 0 | NA     |        |                                                           |
| BBOV_IV001600  | TA05220 | PF14_0511   | LmjF34.0080 | YNL241C | K01057 | K01057 | K01057 | K00036 | K00036 | BBM_I01495 | 5 |      | 5 | 2 | K01057 | K01057 | 6-phosphogluconolactonase [EC:3.1.1.31]                   |
| BBOV_IV001620  | TA05225 | PF14_0365   | LmjF15.0020 | YDL203C |        |        |        |        | K07126 | BBM_I01500 | 5 |      | 1 | 1 | K07126 | K07126 |                                                           |
| BBOV_IV001630  | TA05230 | PF14_0364   | LmjF34.3430 | YLR277C | K14403 | K14403 | K14403 | K14403 | K14403 | BBM_I01505 | 5 |      | 5 | 1 | K14403 | K14403 | cleavage and polyadenylation specificity factor subunit 3 |
|                |         | PF10_0404   |             | YLR300W |        |        | K13851 |        | K01210 | BBM_I01510 | 2 |      | 2 | 2 | NA     |        |                                                           |
|                |         |             |             | YBR072W |        |        |        |        | K13993 | BBM_I01515 | 1 |      | 1 | 1 | NA     |        |                                                           |
| BBOV_IV001660  |         | PF14_0691   |             | YGR083C |        |        |        |        | K03680 | BBM_I01520 | 3 |      | 1 | 1 | NA     |        |                                                           |
| BBOV_IV001800  | TA17590 | PF14_0690   | LmjF08.1090 | YPL116W |        |        |        |        | K11484 | BBM_I01525 | 5 |      | 1 | 1 | K11484 | K11484 | histone deacetylase HOS3 [EC:3.5.1.98]                    |
| BBOV_IV001790  |         |             |             |         |        |        |        |        |        | BBM_I01530 | 1 |      | 0 | 0 | NA     |        |                                                           |
|                |         |             | LmjF16.1430 | YGL151W |        |        |        |        |        | BBM_I01535 | 2 |      | 0 | 0 | NA     |        |                                                           |
| BBOV_IV001770  | TA04885 |             |             |         |        |        |        |        |        | BBM_I01540 | 2 | piro | 0 | 0 | Valid  |        |                                                           |
|                | TA04880 |             |             | YMR243C |        |        |        |        | K14688 | BBM_I01545 | 2 |      | 1 | 1 | NA     |        |                                                           |
| BBOV_IV001730  | TA04875 | MAL7P1.147  | LmjF35.1740 | YMR304W | K11838 | K11838 | K11838 | K11838 | K11838 | BBM_I01550 | 5 |      | 5 | 1 | K11838 | K11838 | ubiquitin carboxyl-terminal hydrolase 7 [EC:3.1.2.15]     |
| BBOV_III009710 | TA11090 | PF13_0308   | LmjF24.0610 |         |        |        |        |        |        | BBM_I01555 | 4 | api+ | 0 | 0 | Valid  |        |                                                           |
| BBOV_IV007750  |         |             |             |         |        |        |        |        |        | BBM_I01560 | 1 |      | 0 | 0 | NA     |        |                                                           |
| BBOV_III009720 | TA11085 | MAL8P1.18   |             |         |        |        |        |        |        | BBM_I01570 | 3 | api  | 0 | 0 | Valid  |        |                                                           |
| BBOV_III009730 | TA11080 | PF14_0446   |             |         |        |        |        |        |        | BBM_I01575 | 3 | api  | 0 | 0 | Valid  |        |                                                           |
| BBOV_III009740 | TA11075 | PF11_0250   | LmjF15.1470 | YEL026W | K12845 | K12845 | K12845 | K12845 | K12845 | BBM_I01580 | 5 |      | 5 | 1 | K12845 | K12845 | SNU13, NHP2L, U4/U6 small nuclear ribonucleoprotein SNU13 |
| BBOV_III009760 | TA11065 | PFD0780w    | LmjF16.1360 | YMR293C | K02433 | K02433 | K01957 |        | K02433 | BBM_I01585 | 5 |      | 4 | 2 | NA     |        |                                                           |
| BBOV_IV002420  | TA04395 | PF11_0251   | LmjF16.1530 | YML130C |        |        | K00540 | K00540 |        | BBM_I01590 | 5 |      | 2 | 1 | K00540 | K00540 |                                                           |
| BBOV_IV002430  | TA04385 | PF11_0252   | LmjF23.1570 | YCR032W |        |        |        |        |        | BBM_I01605 | 5 |      | 0 | 0 | Valid  |        |                                                           |
| BBOV_IV002500  | TA04350 |             | LmjF36.4810 | YLR067C |        |        |        |        |        | BBM_I01620 | 4 |      | 0 | 0 | NA     |        |                                                           |
| BBOV_IV002490  |         | PF08_0007   | LmjF16.0770 |         |        |        |        |        |        | BBM_I01625 | 3 |      | 0 | 0 | NA     |        |                                                           |
| BBOV_IV002480  |         |             | LmjF23.0090 | YGL202W |        |        |        |        | K00838 | BBM_I01630 | 3 |      | 1 | 1 | NA     |        |                                                           |
| BBOV_IV002460  | TA04370 | MAL8P1.13   | LmjF10.1310 |         |        |        |        |        |        | BBM_I01635 | 4 | api+ | 0 | 0 | Valid  |        |                                                           |
| BBOV_IV002450  | TA04375 | PF08_0006   | LmjF16.1610 | YGR132C |        |        |        |        |        | BBM_I01640 | 5 |      | 0 | 0 | Valid  |        |                                                           |
| BBOV_IV002440  | TA04380 | MAL8P1.14   | LmjF35.4580 | YER154W | K03217 | K03217 | K03217 |        | K03217 | BBM_I01645 | 5 |      | 4 | 1 | K03217 | K03217 | preprotein translocase subunit YidC                       |
| BBOV_IV002380  | TA04415 | PF08_0010   |             |         |        |        |        |        |        | BBM_I01650 | 3 | api  | 0 | 0 | Valid  |        |                                                           |
| BBOV_IV002370  | TA04430 | PF08_0011   |             | YLR382C | K01869 | K01869 | K01869 |        | K01869 | BBM_I01655 | 4 | api+ | 4 | 1 | K01869 | K01869 | leucyl-tRNA synthetase [EC:6.1.1.4]                       |
| BBOV_IV002360  | TA04435 |             |             |         |        |        |        |        |        | BBM_I01660 | 2 | piro | 0 | 0 | Valid  |        |                                                           |
| BBOV_IV002350  | TA04440 | MAL8P1.9    |             | YJL124C | K12627 | K12627 | K12627 |        | K12620 | BBM_I01665 | 4 | api+ | 4 | 2 | K12627 | K12627 | U6 snRNA-associated Sm-like protein LSM8                  |

|                |         |            |             |         |        |        |        |        |        |            |   |      |   |   |        |        |                                                             |
|----------------|---------|------------|-------------|---------|--------|--------|--------|--------|--------|------------|---|------|---|---|--------|--------|-------------------------------------------------------------|
| BBOV_IV002330  | TA04450 | MAL8P1.17  | LmjF36.6940 | YCL043C | K09580 | K01829 | K01829 | K01829 | K09580 | BBM_I01670 | 5 |      | 5 | 2 | K09580 | K09580 | protein disulfide-isomerase A1 [EC:5.3.4.1]                 |
| BBOV_IV002320  |         | PF08_0012  |             |         |        |        |        |        |        | BBM_I01675 | 2 |      | 0 | 0 | NA     |        |                                                             |
| BBOV_IV002310  | TA04455 | MAL8P1.22  | LmjF13.0020 | YBR002C | K11778 | K11778 |        |        | K11778 | BBM_I01680 | 5 |      | 3 | 1 | K11778 | K11778 | cis-prenyltransferase, dehydrololichyl diphosphate synthase |
|                | TA04475 | PF08_0021  |             |         |        |        | K14964 |        |        | BBM_I01685 | 2 |      | 1 | 1 | NA     |        |                                                             |
| BBOV_IV002300  | TA04485 | PF10530c   | LmjF03.0090 | YKL045W | K02685 | K02685 | K02685 | K02685 | K02685 | BBM_I01690 | 5 |      | 5 | 1 | K02685 | K02685 | DNA primase large subunit [EC:2.7.7.-]                      |
| BBOV_IV011170  | TA03015 | PFL1520w   | LmjF23.0650 | YPR082C | K12859 | K12859 | K12859 | K12859 | K12859 | BBM_I01695 | 5 |      | 5 | 1 | K12859 | K12859 | U5 snRNP protein, DIM1 family                               |
| BBOV_IV002290  | TA04495 | PF10525w   | LmjF21.0660 | YGL091C |        |        |        |        |        | BBM_I01700 | 5 |      | 0 | 0 | Valid  |        |                                                             |
|                |         |            |             |         |        |        |        |        |        | BBM_I01702 | 0 |      | 0 | 0 | NA     |        |                                                             |
| BBOV_IV002240  | TA04505 | PF14_0585  | LmjF26.1640 | YLR264W | K02979 | K02979 | K02979 | K02979 | K02979 | BBM_I01705 | 5 |      | 5 | 1 | K02979 | K02979 | small subunit ribosomal protein S28e                        |
| BBOV_IV002230  | TA04510 | PF14_0584  | LmjF32.0690 | YHR148W | K14560 | K14560 | K14560 | K14560 | K14560 | BBM_I01710 | 5 |      | 5 | 1 | K14560 | K14560 | IMP3, U3 small nucleolar ribonucleoprotein protein IMP3     |
| BBOV_IV002220  | TA04515 | PFL1985c   | LmjF20.0510 |         |        |        |        |        |        | BBM_I01715 | 4 | api+ | 0 | 0 | Valid  |        |                                                             |
|                | TA04520 | PFL2000w   | LmjF32.0110 | YNL003C |        |        |        |        |        | BBM_I01720 | 4 |      | 0 | 0 | NA     |        |                                                             |
| BBOV_IV002210  | TA04525 | PFL2005w   | LmjF27.0550 | YOL094C | K10755 | K10755 | K10755 | K10755 | K10755 | BBM_I01725 | 5 |      | 5 | 1 | K10755 | K10755 | replication factor C subunit 2/4                            |
| BBOV_IV002200  | TA04530 |            |             | YLR276C |        |        |        |        | K14810 | BBM_I01730 | 3 |      | 1 | 1 | NA     |        |                                                             |
| BBOV_IV002150  | TA04535 | PFL2015w   | LmjF34.2430 |         |        |        |        |        |        | BBM_I01735 | 4 | api+ | 0 | 0 | Valid  |        |                                                             |
|                |         |            |             |         |        |        |        |        |        | BBM_I01737 | 0 |      | 0 | 0 | NA     |        |                                                             |
| BBOV_IV002140  | TA04540 | PF14_0587  | LmjF30.0570 | YMR240C | K12829 | K12829 | K12829 | K12829 | K12829 | BBM_I01740 | 5 |      | 5 | 1 | K12829 | K12829 | splicing factor 3B subunit 2                                |
| BBOV_IV002130  | TA04550 |            |             |         |        |        |        |        |        | BBM_I01750 | 2 | piro | 0 | 0 | Valid  |        |                                                             |
|                |         |            |             |         |        |        |        |        |        | BBM_I01755 | 0 |      | 0 | 0 | NA     |        |                                                             |
|                | TA04560 | PF14_0592  |             |         |        |        |        |        |        | BBM_I01757 | 2 |      | 0 | 0 | NA     |        |                                                             |
| BBOV_IV002100  | TA04570 | PF13_0329  |             |         |        |        |        |        |        | BBM_I01760 | 3 | api  | 0 | 0 | Valid  |        |                                                             |
| BBOV_IV002090  | TA04575 | PF13_0330  | LmjF34.2610 | YPL235W | K11338 | K11338 | K11338 | K11338 | K11338 | BBM_I01765 | 5 |      | 5 | 1 | K11338 | K11338 | RuvB-like protein 2 [EC:3.6.1.-]                            |
| BBOV_IV002080  | TA04580 | PF13_0331  |             |         |        |        |        |        |        | BBM_I01770 | 3 | api  | 0 | 0 | Valid  |        |                                                             |
| BBOV_IV002070  | TA04590 | PF13_0328  | LmjF15.1450 | YBR088C | K04802 | K04802 | K04802 | K04802 | K04802 | BBM_I01775 | 5 |      | 5 | 1 | K04802 | K04802 | proliferating cell nuclear antigen                          |
| BBOV_IV002060  | TA04595 | MAL8P1.142 | LmjF34.4520 | YFR050C | K02736 | K02736 | K02736 | K02736 | K02736 | BBM_I01780 | 5 |      | 5 | 1 | K02736 | K02736 | 20S proteasome subunit beta 7 [EC:3.4.25.1]                 |
| BBOV_IV002050  | TA04600 | PFL0185c   | LmjF31.1750 | YKR048C | K11279 | K11279 | K11279 | K11279 | K11279 | BBM_I01785 | 5 |      | 5 | 1 | K11279 | K11279 | nucleosome assembly protein 1-like 1                        |
| BBOV_IV002040  | TA04605 | PFL0190w   | LmjF35.1300 | YBR082C | K06689 | K06689 | K06689 | K06689 | K06689 | BBM_I01790 | 5 |      | 5 | 1 | K06689 | K06689 | ubiquitin-conjugating enzyme E2 D/E [EC:6.3.2.19]           |
|                |         |            | LmjF26.0020 |         |        |        | K05606 |        |        | BBM_I01795 | 1 |      | 1 | 1 | NA     |        |                                                             |
| BBOV_IV002030  | TA04615 | PFL0295c   | LmjF18.0110 | YFL034W |        |        |        |        |        | BBM_I01800 | 5 |      | 0 | 0 | Valid  |        |                                                             |
| BBOV_IV002020  | TA04620 | PFL0290w   | LmjF36.6530 | YNL039W |        |        |        |        |        | BBM_I01805 | 5 |      | 0 | 0 | Valid  |        |                                                             |
| BBOV_IV002010  | TA04625 | PFL0280c   |             | YOR323C |        |        |        |        | K00147 | BBM_I01810 | 4 | api+ | 1 | 1 | Valid  |        |                                                             |
| BBOV_IV002000  | TA04630 | PF08_0124  | LmjF28.2330 |         |        |        |        |        |        | BBM_I01815 | 4 | api+ | 0 | 0 | Valid  |        |                                                             |
|                |         |            |             |         |        |        |        |        |        | BBM_I01820 | 0 |      | 0 | 0 | NA     |        |                                                             |
|                |         |            |             |         |        |        |        |        |        | BBM_I01825 | 0 |      | 0 | 0 | NA     |        |                                                             |
| BBOV_IV001990  | TA04650 | PFL0230w   | LmjF32.2080 | YLR316C |        |        |        |        |        | BBM_I01830 | 5 |      | 0 | 0 | Valid  |        |                                                             |
| BBOV_IV001980  |         | PFL0235w   |             |         |        |        |        |        |        | BBM_I01835 | 2 |      | 0 | 0 | NA     |        |                                                             |
| BBOV_III002330 | TA04655 | PFL0250w   |             | YLL052C |        |        |        |        | K09885 | BBM_I01840 | 4 | api+ | 1 | 1 | Valid  |        |                                                             |
| BBOV_IV001970  | TA04660 | PFL0260c   |             |         |        |        |        |        |        | BBM_I01845 | 3 | api  | 0 | 0 | Valid  |        |                                                             |
| BBOV_IV001960  | TA04665 | PFL0275w   | LmjF17.0290 | YOL054W |        |        |        |        |        | BBM_I01850 | 5 |      | 0 | 0 | Valid  |        |                                                             |
| BBOV_IV001950  | TA09495 | MAL8P1.140 |             |         | K01265 | K01265 | K01265 |        |        | BBM_I01855 | 3 | api  | 3 | 1 | K01265 | K01265 | methionyl aminopeptidase [EC:3.4.11.18]                     |
| BBOV_IV001940  | TA04720 | MAL8P1.139 | LmjF07.0380 | YJR033C |        |        |        |        |        | BBM_I01860 | 5 |      | 0 | 0 | Valid  |        |                                                             |
| BBOV_IV001930  | TA04725 | PFL0130c   | LmjF09.0940 | YPL009C |        |        |        |        |        | BBM_I01865 | 5 |      | 0 | 0 | Valid  |        |                                                             |
| BBOV_IV001920  |         |            |             |         |        |        |        |        |        | BBM_I01870 | 1 |      | 0 | 0 | NA     |        |                                                             |
| BBOV_IV007390  | TA15765 |            |             |         |        |        |        |        |        | BBM_I01875 | 2 | piro | 0 | 0 | Valid  |        |                                                             |
| BBOV_IV001900  | TA04740 | PFL0150w   | LmjF28.0030 | YML065W | K02603 |        |        | K02603 | K02603 | BBM_I01880 | 5 |      | 3 | 1 | K02603 | K02603 | origin recognition complex subunit 1                        |
|                |         |            |             |         |        |        |        |        |        | BBM_I01885 | 0 |      | 0 | 0 | NA     |        |                                                             |
| BBOV_IV001880  | TA04750 | PFL0175c   | LmjF28.2070 | YGL169W |        |        |        |        | K07566 | BBM_I01890 | 5 |      | 1 | 1 | K07566 | K07566 | SUA5, putative translation factor                           |
| BBOV_IV001870  |         |            |             | YPL231W |        |        |        |        | K00667 | BBM_I01895 | 2 |      | 1 | 1 | NA     |        |                                                             |
| BBOV_IV001860  | TA04760 | PF14_0665  |             |         |        |        |        |        |        | BBM_I01900 | 3 | api  | 0 | 0 | Valid  |        |                                                             |
| BBOV_IV001850  |         | PF14_0666  |             |         |        |        |        |        |        | BBM_I01905 | 2 |      | 0 | 0 | NA     |        |                                                             |
| BBOV_IV001840  | TA04765 | PF08_0096  | LmjF32.0400 | YPL119C | K11594 | K11594 | K11594 | K11594 | K11594 | BBM_I01910 | 5 |      | 5 | 1 | K11594 | K11594 | ATP-dependent RNA helicase [EC:3.6.4.13]                    |
| BBOV_IV001830  | TA04770 | PFL0950c   | LmjF13.1530 | YAL026C | K14802 | K01530 | K01530 | K14802 | K14802 | BBM_I01915 | 5 |      | 5 | 2 | K14802 | K14802 | DRS2, ATP8A, phospholipid-transporting ATPase [EC:3.6.3.1]  |
| BBOV_IV001820  | TA04775 | PFL0930w   | LmjF36.1630 | YGL206C | K04646 | K04646 | K04646 | K04646 | K04646 | BBM_I01920 | 5 |      | 5 | 1 | K04646 | K04646 | clathrin, heavy polypeptide                                 |
| BBOV_IV001810  | TA04780 | MAL13P1.76 | LmjF24.1680 | YLR005W | K03142 | K03142 | K03142 | K03142 | K03142 | BBM_I01925 | 5 |      | 5 | 1 | K03142 | K03142 | transcription initiation factor TFIIF subunit H2            |

|                |         |            |             |           |        |        |        |        |        |            |   |      |   |   |        |        |                                                            |
|----------------|---------|------------|-------------|-----------|--------|--------|--------|--------|--------|------------|---|------|---|---|--------|--------|------------------------------------------------------------|
| BBOV_IV001750  | TA04810 | PF07_0041  | LmjF19.0700 |           |        |        |        |        |        | BBM_I01930 | 4 | api+ | 0 | 0 | Valid  |        |                                                            |
|                |         |            |             |           |        |        |        |        |        | BBM_I01935 | 0 |      | 0 | 0 | NA     |        |                                                            |
|                |         |            |             |           |        |        |        |        |        | BBM_I01940 | 0 |      | 0 | 0 | NA     |        |                                                            |
|                | TA04830 | MAL7P1.31  |             |           |        |        |        |        |        | BBM_I01945 | 2 |      | 0 | 0 | NA     |        |                                                            |
| BBOV_IV001670  | TA04835 | MAL7P1.33  |             |           |        |        |        |        |        | BBM_I01950 | 3 | api  | 0 | 0 | Valid  |        |                                                            |
| BBOV_IV001680  | TA04840 | PF07_0043  | LmjF36.3740 | YER056C-A | K02915 | K02915 | K02915 | K02915 | K02915 | BBM_I01955 | 5 |      | 5 | 1 | K02915 | K02915 | large subunit ribosomal protein L34e                       |
| BBOV_IV001690  | TA04845 | PFA_0145c  | LmjF30.0460 | YLL018C   | K01876 | K01876 | K01876 | K01876 | K01876 | BBM_I01960 | 5 |      | 5 | 1 | K01876 | K01876 | aspartyl-tRNA synthetase [EC:6.1.1.12]                     |
| BBOV_IV001700  | TA04855 |            |             |           | K13525 |        |        |        |        | BBM_I01965 | 2 | piro | 1 | 1 | Valid  |        |                                                            |
| BBOV_IV001710  | TA04865 | MAL7P1.145 | LmjF35.1660 | YNL082W   |        |        |        |        |        | BBM_I01970 | 5 |      | 0 | 0 | Valid  |        |                                                            |
|                |         | PF10_0322  |             |           |        |        |        |        |        | BBM_I01975 | 1 |      | 0 | 0 | NA     |        |                                                            |
| BBOV_III009700 | TA11095 |            |             |           |        |        |        |        |        | BBM_I01980 | 2 | piro | 0 | 0 | Valid  |        |                                                            |
|                |         |            |             |           |        |        |        |        |        | BBM_I01985 | 0 |      | 0 | 0 | NA     |        |                                                            |
| BBOV_III009680 | TA11105 | PF08_0132  | LmjF15.1010 | YDL215C   | K00260 | K00260 | K00260 | K00260 | K00260 | BBM_I01990 | 5 |      | 5 | 1 | K00260 | K00260 | glutamate dehydrogenase [EC:1.4.1.2]                       |
| BBOV_III009670 | TA11110 | PF14_0697  |             | YLR420W   | K01465 | K01465 | K01465 |        | K01465 | BBM_I01995 | 4 | api+ | 4 | 1 | K01465 | K01465 | dihydroorotase [EC:3.5.2.3]                                |
|                |         |            |             |           |        |        |        |        |        | BBM_I02000 | 0 |      | 0 | 0 | NA     |        |                                                            |
|                | TA11130 | MAL8P1.157 |             |           |        |        |        |        |        | BBM_I02005 | 2 |      | 0 | 0 | NA     |        |                                                            |
| BBOV_III009640 | TA11125 | MAL8P1.156 | LmjF32.1580 | YER003C   | K01809 | K01809 |        | K01809 | K01809 | BBM_I02010 | 5 |      | 4 | 1 | K01809 | K01809 | mannose-6-phosphate isomerase [EC:5.3.1.8]                 |
| BBOV_III009650 | TA11120 |            |             |           |        | K00870 |        |        |        | BBM_I02015 | 2 | piro | 1 | 1 | Valid  |        |                                                            |
| BBOV_III010940 | TA13185 |            | LmjF06.0120 |           |        |        |        | K03768 |        | BBM_I02020 | 3 |      | 2 | 2 | NA     |        |                                                            |
| BBOV_III010930 | TA13190 | PF14_0122  | LmjF10.0850 | YER009W   |        |        |        |        |        | BBM_I02025 | 5 |      | 0 | 0 | Valid  |        |                                                            |
|                |         |            |             |           |        |        |        |        |        | BBM_I02030 | 0 |      | 0 | 0 | NA     |        |                                                            |
|                |         |            |             | YGR229C   |        |        |        |        |        | BBM_I02035 | 1 |      | 0 | 0 | NA     |        |                                                            |
| BBOV_III010920 | TA13245 | PF11_0168  |             |           |        |        |        |        |        | BBM_I02040 | 3 | api  | 0 | 0 | Valid  |        |                                                            |
| BBOV_III010910 | TA13405 | PF14_0123  | LmjF27.0890 | YFR019W   |        |        |        |        | K00921 | BBM_I02045 | 5 |      | 1 | 1 | K00921 | K00921 | 1-phosphatidylinositol-3-phosphate 5-kinase [EC:2.7.1.150] |
| BBOV_III010870 | TA13465 | PF14_0127  | LmjF32.0080 | YLR195C   | K00671 | K00671 | K00671 | K00671 | K00671 | BBM_I02050 | 5 |      | 5 | 1 | K00671 | K00671 | glycylpeptide N-tetradecanoyltransferase [EC:2.3.1.97]     |
| BBOV_III010880 | TA13575 |            |             |           |        |        |        |        |        | BBM_I02055 | 2 | piro | 0 | 0 | Valid  |        |                                                            |
|                |         |            |             |           |        |        |        |        |        | BBM_I02060 | 0 |      | 0 | 0 | NA     |        |                                                            |
| BBOV_III010890 | TA13570 | PF14_0125  | LmjF20.0250 | YHR068W   | K00809 | K00809 | K00809 | K00809 | K00809 | BBM_I02065 | 5 |      | 5 | 1 | K00809 | K00809 | deoxyhypusine synthase [EC:2.5.1.46]                       |
| BBOV_III010860 | TA13630 | PFC0715c   |             |           |        |        |        |        |        | BBM_I02070 | 3 | api  | 0 | 0 | Valid  |        |                                                            |
| BBOV_III010840 | TA13735 | PFC0710w.1 | LmjF11.0210 | YMR267W   | K01507 | K01507 |        | K01507 |        | BBM_I02075 | 5 |      | 3 | 1 | K01507 | K01507 | inorganic pyrophosphatase [EC:3.6.1.1]                     |
| BBOV_III010830 | TA13740 |            |             | YNL139C   |        |        |        |        | K12879 | BBM_I02080 | 3 |      | 1 | 1 | NA     |        |                                                            |
| BBOV_III010820 | TA13795 | PFC0720w   |             | YER182W   |        |        |        |        |        | BBM_I02085 | 4 | api+ | 0 | 0 | Valid  |        |                                                            |
| BBOV_III010810 | TA13900 | PFC0735w   | LmjF11.1190 | YJL190C   | K02957 | K02957 | K02957 | K02957 | K02957 | BBM_I02090 | 5 |      | 5 | 1 | K02957 | K02957 | small subunit ribosomal protein S15Ae                      |
|                |         |            |             |           |        |        |        |        |        | BBM_I02095 | 0 |      | 0 | 0 | NA     |        |                                                            |
| BBOV_III010800 | TA13960 | PFC0730w   |             |           |        |        |        |        |        | BBM_I02100 | 3 | api  | 0 | 0 | Valid  |        |                                                            |
| BBOV_III010790 | TA14065 | PFF0760w   |             |           |        |        |        |        |        | BBM_I02105 | 3 | api  | 0 | 0 | Valid  |        |                                                            |
| BBOV_III010780 | TA14070 | PF14_0574  |             |           |        |        |        |        |        | BBM_I02110 | 3 | api  | 0 | 0 | Valid  | NA     |                                                            |
| BBOV_III010770 | TA14175 | PF14_0252  |             |           |        |        |        |        |        | BBM_I02115 | 3 | api  | 0 | 0 | Valid  |        |                                                            |
| BBOV_III02080  | TA07940 |            |             | YGR238C   |        |        |        |        |        | BBM_I02120 | 3 |      | 0 | 0 | NA     |        |                                                            |
| BBOV_III02090  |         | PF14_0246  |             |           | K01595 |        | K01595 |        |        | BBM_I02125 | 2 |      | 2 | 1 | NA     |        |                                                            |
|                | TA07945 |            |             |           |        |        |        |        |        | BBM_I02130 | 1 |      | 0 | 0 | NA     |        |                                                            |
|                |         |            | LmjF31.2010 | YJL049W   |        |        |        |        |        | BBM_I02135 | 2 |      | 0 | 0 | NA     |        |                                                            |
| BBOV_III02110  | TA07950 | PFE0800w   |             | YML109W   |        |        |        |        |        | BBM_I02140 | 4 | api+ | 0 | 0 | Valid  |        |                                                            |
| BBOV_III010500 | TA15385 | PF14_0141  | L2256.04    | YLR075W   | K02866 | K02866 | K02866 | K02866 | K02866 | BBM_I02145 | 5 |      | 5 | 1 | K02866 | K02866 | large subunit ribosomal protein L10e                       |
| BBOV_III010510 | TA15275 | PF14_0241  | LmjF36.3770 | YPL037C   | K01527 | K01527 | K01527 | K01527 | K01527 | BBM_I02150 | 5 |      | 5 | 1 | K01527 | K01527 | nascent polypeptide-associated complex subunit beta        |
| BBOV_III010520 | TA15220 | PF14_0240  | LmjF16.0460 | YBR191W   | K02889 | K02889 | K02889 | K02889 | K02889 | BBM_I02155 | 5 |      | 5 | 1 | K02889 | K02889 | large subunit ribosomal protein L21e                       |
| BBOV_III010530 | TA15115 | PF14_0242  | LmjF12.1270 | YBR034C   | K11434 | K11434 | K11434 | K11434 | K11434 | BBM_I02160 | 5 |      | 5 | 1 | K11434 | K11434 | protein arginine N-methyltransferase 1 [EC:2.1.1.-]        |
| BBOV_III010570 | TA15000 |            |             |           |        |        |        |        |        | BBM_I02165 | 2 | piro | 0 | 0 | Valid  |        |                                                            |
| BBOV_III010580 | TA14895 | PF14_0231  | LmjF07.0510 | YLL045C   | K02936 | K02936 | K02936 | K02936 | K02936 | BBM_I02170 | 5 |      | 5 | 1 | K02936 | K02936 | large subunit ribosomal protein L7Ae                       |
| BBOV_III010590 | TA14890 | PF14_0230  | LmjF35.1890 | YPL131W   | K02932 | K02932 | K02932 | K02932 | K02932 | BBM_I02175 | 5 |      | 5 | 1 | K02932 | K02932 | large subunit ribosomal protein L5e                        |
| BBOV_III010600 | TA14785 | PFD0515w   | LmjF14.0010 | YHR069C   | K03679 | K03679 | K03679 | K03679 | K03679 | BBM_I02180 | 5 |      | 5 | 1 | K03679 | K03679 | exosome complex component RRP4                             |
|                |         |            |             |           |        |        |        |        |        | BBM_I02181 |   |      |   |   | Valid  |        | tRNA, Ala, anticodon TGC                                   |
| BBOV_III010620 | TA14730 | PF14_0575a | LmjF36.3400 | YFR032C-A | K02905 | K02905 |        | K02905 | K02905 | BBM_I02183 | 5 |      | 4 | 1 | K02905 | K02905 | large subunit ribosomal protein L29e                       |
| BBOV_III010630 |         | PF14_0576  | LmjF25.0190 | YJR099W   | K05609 |        | K05609 | K05609 | K05609 | BBM_I02185 | 4 |      | 4 | 1 | K05609 | K05609 | ubiquitin carboxyl-terminal hydrolase L3 [EC:3.4.19.12]    |



|                |         |             |             |         |        |        |        |        |            |            |      |      |   |        |        |                                                                   |                          |
|----------------|---------|-------------|-------------|---------|--------|--------|--------|--------|------------|------------|------|------|---|--------|--------|-------------------------------------------------------------------|--------------------------|
|                |         |             |             |         |        |        |        |        |            | BBM_I02186 |      |      |   |        |        | Valid                                                             | tRNA, Ala, anticodon CGC |
| BBOV_III010650 | TA14725 | PF14_0575   | LmjF36.5320 |         |        |        |        |        |            | BBM_I02190 | 4    | api+ | 0 | 0      | Valid  |                                                                   |                          |
| BBOV_III010660 | TA14670 | PF14_0569   | LmjF36.4380 |         |        |        |        |        |            | BBM_I02195 | 4    | api+ | 0 | 0      | Valid  |                                                                   |                          |
| BBOV_III010680 | TA14565 | PF14_0579   | LmjF32.2710 | YDR471W | K02901 | K02901 | K02901 | K02901 | BBM_I02200 | 5          |      | 5    | 1 | K02901 | K02901 | large subunit ribosomal protein L27e                              |                          |
| BBOV_III010690 | TA14510 | PF14_0580   | LmjF35.4660 | YLR119W |        |        |        |        | BBM_I02205 | 5          |      | 0    | 0 | Valid  |        |                                                                   |                          |
| BBOV_III010700 | TA14505 | PF13_0054   |             |         |        |        |        |        | BBM_I02210 | 3          | api  | 0    | 0 | Valid  |        |                                                                   |                          |
| BBOV_III010710 | TA14400 | PF13_0053   | LmjF27.0910 | YLR148W |        |        |        |        | BBM_I02215 | 5          |      | 0    | 0 | Valid  |        |                                                                   |                          |
| BBOV_III02140  | TA07960 | PF14_0248   | LmjF31.2580 | YJR046W | K00416 | K00416 | K00416 | K12414 | BBM_I02220 | 5          |      | 5    | 2 | K00416 | K00416 | ubiquinol-cytochrome c reductase subunit 6 [EC:1.10.2.2]          |                          |
| BBOV_III02150  | TA07965 | MAL13P1.45  | LmjF01.0560 | YDR473C | K12843 | K12843 | K12843 | K12843 | BBM_I02225 | 5          |      | 4    | 1 | K12843 | K12843 | U4/U6 small nuclear ribonucleoprotein PRP3                        |                          |
| BBOV_III02160  |         | PF13_0050   | LmjF36.1110 |         |        |        |        |        | BBM_I02230 | 3          |      | 0    | 0 | NA     |        |                                                                   |                          |
| BBOV_III02170  | TA07975 | PF13_0051   | LmjF34.4290 | YHR089C | K11128 | K11128 | K11128 | K11128 | BBM_I02235 | 5          |      | 5    | 1 | K11128 | K11128 | GAR1, NOLA1, H/ACA ribonucleoprotein complex subunit 1            |                          |
| BBOV_III02180  | TA07980 | PF13_0052   |             |         | K02427 | K02427 | K02427 |        | BBM_I02240 | 3          | api  | 3    | 1 | K02427 | K02427 | rlmE, rrmJ, ftsJ, ribosomal RNA large subunit methyltransferase E |                          |
| BBOV_III02450  | TA07990 |             | LmjF21.0160 |         |        |        |        |        | BBM_I02245 | 3          |      | 0    | 0 | NA     |        |                                                                   |                          |
|                |         |             |             |         |        |        |        |        | BBM_I02250 | 0          |      | 0    | 0 | NA     |        |                                                                   |                          |
|                | TA08005 |             |             |         |        |        |        |        | BBM_I02255 | 1          |      | 0    | 0 | NA     |        |                                                                   |                          |
| BBOV_III03560  | TA02525 | PF13_0045   | LmjF36.3750 | YHR021C | K02978 | K02978 | K02978 | K02978 | BBM_I02260 | 5          |      | 5    | 1 | K02978 | K02978 | small subunit ribosomal protein S27e                              |                          |
|                |         | MAL13P1.42  |             |         |        |        |        |        | BBM_I02265 | 1          |      | 0    | 0 | NA     |        |                                                                   |                          |
|                |         |             |             | YGL012W |        |        |        | K00223 | BBM_I02270 | 1          |      | 1    | 1 | NA     |        |                                                                   |                          |
| BBOV_III03570  | TA02535 | PF13_0049   | LmjF11.0900 | YGL031C | K02896 | K02896 | K02896 | K02896 | BBM_I02275 | 5          |      | 5    | 1 | K02896 | K02896 | large subunit ribosomal protein L24e                              |                          |
| BBOV_III03580  | TA02540 | PF13_0048   | LmjF36.3660 | YNL118C | K12613 | K12613 | K12613 | K12613 | BBM_I02280 | 5          |      | 4    | 1 | K12613 | K12613 | mRNA-decapping enzyme subunit 2 [EC:3.-.-.]                       |                          |
| BBOV_III03590  | TA02545 | PF13_0044   | LmjF16.0590 | YJL130C |        | K01954 | K01954 | K01954 | BBM_I02285 | 5          |      | 4    | 2 | NA     | K11541 | carbamoyl-phosphate synthase [EC:6.3.5.5]/ aspartate              |                          |
| BBOV_III03600  | TA02550 | PFC0525c    | LmjF18.0270 | YMR139W |        | K08286 | K03083 | K00870 | BBM_I02290 | 5          |      | 4    | 4 | NA     |        |                                                                   |                          |
| BBOV_III03610  | TA02555 | PFC0520w    | LmjF32.1200 | YFR052W | K03031 | K03031 | K03031 | K03031 | BBM_I02293 | 5          |      | 5    | 1 | K03031 | K03031 | 26S proteasome regulatory subunit N12                             |                          |
| BBOV_III03620  | TA09155 | PFC0510w    |             | YK034W  |        |        |        |        | BBM_I02295 | 4          | api+ | 0    | 0 | Valid  |        |                                                                   |                          |
|                |         | PFB0279w    |             |         |        |        |        |        | BBM_I02300 | 1          |      | 0    | 0 | NA     |        |                                                                   |                          |
| BBOV_III03630  | TA09160 | PFC0506w    |             |         |        |        |        |        | BBM_I02305 | 3          | api  | 0    | 0 | Valid  |        |                                                                   |                          |
|                |         | PFE0128c    | LmjF18.0820 |         |        |        |        |        | BBM_I02310 | 2          |      | 0    | 0 | NA     |        |                                                                   |                          |
| BBOV_III03260  | TA03910 | PF14_0088   | LmjF18.1560 | YJR155W |        |        |        | K00100 | BBM_I02315 | 5          |      | 1    | 1 | K00100 | K00100 |                                                                   |                          |
|                |         |             | LmjF21.0430 |         |        |        |        |        | BBM_I02320 | 1          |      | 0    | 0 | NA     |        |                                                                   |                          |
|                | TA03920 | PFI0985c    |             |         |        |        |        |        | BBM_I02321 | 2          |      | 0    | 0 | NA     |        |                                                                   |                          |
| BBOV_III03280  | TA03925 | PFI0990c    |             |         |        |        |        |        | BBM_I02325 | 3          | api  | 0    | 0 | Valid  |        |                                                                   |                          |
|                |         |             |             |         |        |        |        |        | BBM_I02330 | 0          |      | 0    | 0 | NA     |        |                                                                   |                          |
|                |         |             |             |         |        |        |        |        | BBM_I02335 | 0          |      | 0    | 0 | NA     |        |                                                                   |                          |
| BBOV_IV000110  |         |             | LmjF21.1370 |         |        |        |        |        | BBM_I02340 | 2          |      | 0    | 0 | NA     |        |                                                                   |                          |
|                |         |             |             |         |        |        |        |        | BBM_I02345 | 0          |      | 0    | 0 | NA     |        |                                                                   |                          |
|                | TA03950 | PFE1225w    |             |         |        |        |        |        | BBM_I02350 | 2          |      | 0    | 0 | NA     |        |                                                                   |                          |
| BBOV_III003320 | TA09520 | PFE1230c    |             |         |        |        |        |        | BBM_I02355 | 3          | api  | 0    | 0 | Valid  |        |                                                                   |                          |
| BBOV_III003330 | TA09515 | PF08_0084   |             | YLR298C | K11095 | K11095 | K11095 | K11095 | BBM_I02360 | 4          | api+ | 4    | 1 | K11095 | K11095 | U1 small nuclear ribonucleoprotein C                              |                          |
|                | TA15790 | PFD0405c    |             |         |        |        |        |        | BBM_I02365 | 2          |      | 0    | 0 | NA     |        |                                                                   |                          |
| BBOV_III003340 | TA03955 | PF08_0082   | LmjF13.0490 |         |        |        |        |        | BBM_I02375 | 4          | api+ | 0    | 0 | Valid  |        |                                                                   |                          |
|                |         |             |             |         |        |        |        |        | BBM_I02380 | 0          |      | 0    | 0 | NA     |        |                                                                   |                          |
| BBOV_III003350 | TA03960 | PF08_0083   |             |         |        |        |        |        | BBM_I02385 | 3          | api  | 0    | 0 | Valid  |        |                                                                   |                          |
| BBOV_III003360 | TA03965 | MAL8P1.97   |             |         |        |        |        |        | BBM_I02390 | 3          | api  | 0    | 0 | Valid  |        |                                                                   |                          |
| BBOV_III003370 | TA03975 | MAL8P1.96   |             | YIR019C |        |        |        | K01178 | BBM_I02395 | 4          | api+ | 1    | 1 | Valid  |        |                                                                   |                          |
|                | TA03980 | PF08_0085   | LmjF22.0610 | YGL058W |        | K10573 | K10573 | K10574 | BBM_I02400 | 4          |      | 4    | 2 | NA     |        |                                                                   |                          |
| BBOV_III003390 | TA03990 | PF08_0086   | LmjF16.0640 |         | K12735 | K12735 | K12735 |        | BBM_I02405 | 4          | api+ | 3    | 1 | K12735 | K12735 | peptidyl-prolyl cis-trans isomerase-like 4 [EC:5.2.1.8]           |                          |
| BBOV_III003400 | TA03995 | MAL13P1.66  | LmjF32.0600 | YOR158W |        |        |        |        | BBM_I02415 | 5          |      | 0    | 0 | Valid  |        |                                                                   |                          |
| BBOV_III003430 | TA04025 | PF13_0164   |             |         |        |        |        |        | BBM_I02420 | 3          | api  | 0    | 0 | Valid  |        |                                                                   |                          |
|                |         |             | LmjF36.6180 |         |        |        |        |        | BBM_I02430 | 1          |      | 0    | 0 | NA     |        |                                                                   |                          |
| BBOV_III003420 | TA04016 | PFI0785c    | LmjF22.1050 |         |        |        |        |        | BBM_I02435 | 4          | api+ | 0    | 0 | Valid  |        |                                                                   |                          |
| BBOV_III003440 | TA04030 | MAL13P1.163 |             |         |        |        |        |        | BBM_I02440 | 3          | api  | 0    | 0 | Valid  |        |                                                                   |                          |
| BBOV_III006020 |         |             |             |         |        |        |        |        | BBM_I02445 | 1          |      | 0    | 0 | NA     |        |                                                                   |                          |
|                |         |             |             |         |        |        |        |        | BBM_I02450 | 0          |      | 0    | 0 | NA     |        |                                                                   |                          |
|                | TA04040 | PFA_0315w   | LmjF27.1120 | YLR435W |        | K14800 | K14800 | K14800 | BBM_I02455 | 4          |      | 3    | 1 | K14800 | K14800 | TSR2, pre-rRNA-processing protein TSR2                            |                          |

|                |         |            |             |         |        |        |        |        |        |            |   |      |   |   |        |        |                                                                      |
|----------------|---------|------------|-------------|---------|--------|--------|--------|--------|--------|------------|---|------|---|---|--------|--------|----------------------------------------------------------------------|
| BBOV_III003460 | TA02490 | PFA_0330w  | LmjF28.1880 | YPL217C | K14569 | K14569 | K14569 | K14569 | K14569 | BBM_I02460 | 5 |      | 5 | 1 | K14569 | K14569 | BMS1, ribosome biogenesis protein BMS1                               |
|                |         |            |             |         |        |        |        |        |        | BBM_I02465 | 0 |      | 0 | 0 | NA     |        |                                                                      |
| BBOV_III003470 | TA02495 | PF0970c    | LmjF33.1100 | YAL034C |        |        |        |        |        | BBM_I02470 | 5 |      | 0 | 0 | Valid  |        |                                                                      |
| BBOV_III003480 | TA02500 | PFA_0345w  | LmjF07.0710 |         |        |        |        |        |        | BBM_I02475 | 4 | api+ | 0 | 0 | Valid  |        |                                                                      |
| BBOV_III003490 | TA02505 | PFA_0340w  | LmjF20.1620 |         | K00991 | K00991 |        |        |        | BBM_I02480 | 4 | api+ | 2 | 1 | Valid  |        |                                                                      |
| BBOV_III003510 | TA02510 | PF0495w    |             |         |        | K01382 | K01386 |        |        | BBM_I02485 | 3 | api  | 2 | 2 | NA     |        |                                                                      |
| BBOV_III003520 | TA02515 | PF0500w    |             | YDL020C |        |        |        |        | K03034 | BBM_I02490 | 4 | api+ | 1 | 1 | Valid  |        |                                                                      |
| BBOV_III003240 | TA03900 | PF11_0365  |             |         |        |        |        |        |        | BBM_I02495 | 3 | api  | 0 | 0 | Valid  |        |                                                                      |
| BBOV_III002900 | TA03895 | PF11_0377  | LmjF35.1010 | YPL204W | K02218 | K02218 | K02218 | K02218 | K14758 | BBM_I02500 | 5 |      | 5 | 2 | K02218 | K02218 | casein kinase 1 [EC:2.7.11.1]                                        |
| BBOV_III002920 |         | PF0685c    | LmjF08.0010 |         | K06669 | K06669 | K06669 |        |        | BBM_I02505 | 3 |      | 3 | 1 | K06669 | K06669 | structural maintenance of chromosome 3 (chondroitin sulfate)         |
|                |         |            |             |         |        |        |        |        |        | BBM_I02515 | 0 |      | 0 | 0 | NA     |        |                                                                      |
|                |         |            |             | YDR470C |        |        |        |        |        | BBM_I02520 | 1 |      | 0 | 0 | NA     |        |                                                                      |
| BBOV_III000280 | TA20105 | PF0765c    |             |         |        |        |        |        |        | BBM_I02525 | 3 | api  | 0 | 0 | Valid  |        |                                                                      |
|                |         |            |             |         |        |        |        |        |        | BBM_I02530 | 0 |      | 0 | 0 | NA     |        |                                                                      |
| BBOV_III009990 | TA11620 | MAL8P1.64  |             |         |        |        |        |        |        | BBM_I02535 | 3 | api  | 0 | 0 | Valid  |        |                                                                      |
| BBOV_III010000 | TA11615 | PF0165c    |             | YDL074C | K10696 |        |        |        | K10696 | BBM_I02540 | 4 | api+ | 2 | 1 | Valid  |        |                                                                      |
| BBOV_III010010 | TA11610 | PF08_0054  | LmjF28.2780 | YER103W | K03283 | K03283 | K03283 | K03283 | K03283 | BBM_I02545 | 5 |      | 5 | 1 | K03283 | K03283 | HSPA1_8, heat shock 70kDa protein 1/8                                |
| BBOV_III010020 | TA11600 | PF11345c   | LmjF16.0240 | YPL086C |        |        |        |        | K07739 | BBM_I02550 | 5 |      | 1 | 1 | K07739 | K07739 | elongator complex protein 3 [EC:2.3.1.48]                            |
|                |         | PF10_0370  |             |         |        |        |        |        |        | BBM_I02560 | 1 |      | 0 | 0 | NA     |        |                                                                      |
|                |         |            | LmjF22.0540 |         |        |        |        |        |        | BBM_I02565 | 1 |      | 0 | 0 | NA     |        |                                                                      |
| BBOV_III010030 | TA11585 | PF10_0369  | LmjF32.3920 | YIL143C | K10843 | K10843 | K10843 | K10843 | K10843 | BBM_I02570 | 5 |      | 5 | 1 | K10843 | K10843 | DNA excision repair protein ERCC-3 [EC:3.6.1.-]                      |
| BBOV_III010040 | TA11580 | PF10_0368  | LmjF29.2200 | YLL001W | K01528 | K01528 | K01528 | K01528 | K01528 | BBM_I02575 | 5 |      | 5 | 1 | K01528 | K01528 | dynamin GTPase [EC:3.6.5.5]                                          |
|                |         |            |             |         |        |        |        |        |        | BBM_I02580 | 0 |      | 0 | 0 | NA     |        |                                                                      |
|                |         |            |             |         |        |        |        |        |        | BBM_I02585 | 0 |      | 0 | 0 | NA     |        |                                                                      |
| BBOV_III010060 | TA11570 | PF10_0366  | LmjF19.0210 | YBL030C | K05863 | K05863 | K05863 | K05863 | K05863 | BBM_I02590 | 5 |      | 5 | 1 | K05863 | K05863 | solute carrier family 25 (mitochondrial carrier; adenine nucleotide) |
|                |         |            |             |         |        |        |        |        |        | BBM_I02595 | 0 |      | 0 | 0 | NA     |        |                                                                      |
| BBOV_III010080 | TA11560 | PF11370w   |             | YAR018C | K08857 | K00924 | K08286 |        | K08857 | BBM_I02600 | 4 | api+ | 4 | 3 | NA     |        |                                                                      |
| BBOV_III010090 | TA11555 | PF11375w   |             |         |        |        |        |        |        | BBM_I02610 | 3 | api  | 0 | 0 | Valid  |        |                                                                      |
| BBOV_III010100 |         | PF11355w   |             | YAR027W |        |        |        |        |        | BBM_I02615 | 3 |      | 0 | 0 | NA     |        |                                                                      |
|                | TA11550 | PF11350w   |             |         | K01718 | K01718 |        |        |        | BBM_I02620 | 2 |      | 2 | 1 | NA     |        |                                                                      |
|                |         | PF11445w   |             |         |        |        |        |        |        | BBM_I02625 | 1 |      | 0 | 0 | NA     |        |                                                                      |
|                |         |            |             |         |        |        |        |        |        | BBM_I02630 | 0 |      | 0 | 0 | NA     |        |                                                                      |
| BBOV_III010130 | TA11540 | PF10_0363  |             |         | K00873 | K00873 | K00873 |        |        | BBM_I02635 | 3 | api  | 3 | 1 | K00873 | K00873 | pyruvate kinase [EC:2.7.1.40]                                        |
|                | TA11535 |            |             |         |        |        |        |        |        | BBM_I02640 | 1 |      | 0 | 0 | NA     |        |                                                                      |
|                |         |            |             |         |        |        |        |        |        | BBM_I02645 | 0 |      | 0 | 0 | NA     |        |                                                                      |
| BBOV_III010150 | TA11525 | PF11275c   |             |         |        |        |        |        |        | BBM_I02650 | 3 | api  | 0 | 0 | Valid  |        |                                                                      |
| BBOV_III010160 | TA11520 | PF11280w   |             |         |        |        |        |        |        | BBM_I02655 | 3 | api  | 0 | 0 | Valid  |        |                                                                      |
|                | TA11515 | PF08_0134  |             |         |        |        |        |        |        | BBM_I02660 | 2 |      | 0 | 0 | NA     |        |                                                                      |
| BBOV_III010180 |         |            | LmjF23.0780 | YOR059C |        |        |        |        |        | BBM_I02670 | 3 |      | 0 | 0 | NA     |        |                                                                      |
| BBOV_III010190 | TA11510 | PF14_0090  | LmjF01.0610 | YER143W | K11885 | K11885 | K11885 | K11885 | K11885 | BBM_I02675 | 5 |      | 5 | 1 | K11885 | K11885 | DNA damage-inducible protein 1                                       |
| BBOV_III010200 | TA11505 | PF14_0092  | LmjF10.0650 |         |        |        |        |        |        | BBM_I02680 | 4 | api+ | 0 | 0 | Valid  |        |                                                                      |
| BBOV_III010210 | TA11500 | PF14_0095  | LmjF24.1410 |         |        |        |        |        |        | BBM_I02685 | 4 | api+ | 0 | 0 | Valid  |        |                                                                      |
| BBOV_III010220 | TA11495 | PF14_0094  | LmjF35.4820 |         |        |        |        |        |        | BBM_I02690 | 4 | api+ | 0 | 0 | Valid  |        |                                                                      |
|                |         |            |             |         |        |        |        |        |        | BBM_I02695 | 0 |      | 0 | 0 | NA     |        |                                                                      |
| BBOV_III010230 | TA11490 | PF14_0367  |             |         |        |        |        |        |        | BBM_I02700 | 3 | api  | 0 | 0 | Valid  |        |                                                                      |
| BBOV_III010240 | TA11475 | PF14_0401  | LmjF16.1130 | YGL105W |        |        |        | K01894 |        | BBM_I02705 | 5 |      | 1 | 1 | K01894 | K01894 | glutamyl-Q tRNA(Asp) synthetase [EC:6.1.1.-]                         |
| BBOV_III010250 | TA11470 | PF14_0655  | LmjF01.0770 | YKR059W | K03257 | K03257 | K03257 | K03257 | K03257 | BBM_I02710 | 5 |      | 5 | 1 | K03257 | K03257 | translation initiation factor eIF-4A                                 |
|                |         |            | LmjF32.0650 | YNL160W |        |        |        |        |        | BBM_I02715 | 2 |      | 0 | 0 | NA     |        |                                                                      |
|                |         |            |             |         |        |        |        |        |        | BBM_I02720 | 0 |      | 0 | 0 | NA     |        |                                                                      |
| BBOV_III010270 | TA11460 | PF14_0653  | LmjF19.0130 |         |        | K13989 | K13989 |        |        | BBM_I02725 | 4 | api+ | 2 | 1 | Valid  |        |                                                                      |
| BBOV_III010280 | TA11450 | PF14_0649  |             |         |        |        |        |        |        | BBM_I02730 | 3 | api  | 0 | 0 | Valid  |        |                                                                      |
|                | TA11445 | PF14_0603  | LmjF35.4170 | YBR150C |        |        |        |        |        | BBM_I02735 | 4 |      | 0 | 0 | NA     |        |                                                                      |
| BBOV_III010300 | TA11440 | PF0450w    | LmjF21.1330 | YLR086W | K06675 | K06675 | K06675 | K06675 | K06675 | BBM_I02740 | 5 |      | 5 | 1 | K06675 | K06675 | structural maintenance of chromosome 4                               |
| BBOV_III010310 | TA11435 | MAL13P1.81 |             |         |        |        |        |        |        | BBM_I02745 | 3 | api  | 0 | 0 | Valid  |        |                                                                      |

|                |         |           |             |           |        |        |        |        |        |            |   |      |   |   |        |        |                                                               |
|----------------|---------|-----------|-------------|-----------|--------|--------|--------|--------|--------|------------|---|------|---|---|--------|--------|---------------------------------------------------------------|
| BBOV_III010320 |         |           |             | YPL092W   |        |        |        |        |        | BBM_I02750 | 2 |      | 0 | 0 | NA     |        |                                                               |
|                |         |           |             |           |        |        |        |        |        | BBM_I02752 |   |      |   |   |        | Valid  | tRNA, Glu, anticodon CTC                                      |
| BBOV_III010340 | TA16085 | PFL1160c  |             | YOR192C   |        |        |        |        |        | BBM_I02755 | 4 | api+ | 0 | 0 | Valid  |        |                                                               |
| BBOV_III010350 | TA16080 | PF13_0291 | LmjF28.2385 | YGL201C   | K02542 | K02542 | K02542 | K02542 | K02542 | BBM_I02760 | 5 |      | 5 | 1 | K02542 | K02542 | minichromosome maintenance protein 6                          |
| BBOV_III010360 |         | PF13_0292 | LmjF35.2630 |           |        |        |        |        |        | BBM_I02765 | 3 |      | 0 | 0 | NA     |        |                                                               |
|                |         | PF13_0293 | LmjF24.1750 | YPL165C   |        |        | K11426 |        | K07117 | BBM_I02770 | 3 |      | 2 | 2 | NA     |        |                                                               |
|                |         |           |             |           |        |        |        |        |        | BBM_I02772 |   |      |   |   |        | Valid  | tRNA, Glu, anticodon TTC                                      |
| BBOV_III010380 | TA16065 | PF14_0461 |             |           |        |        |        |        |        | BBM_I02775 | 3 | api  | 0 | 0 | Valid  |        |                                                               |
|                |         |           |             |           |        |        |        |        |        | BBM_I02780 | 0 |      | 0 | 0 | NA     |        |                                                               |
| BBOV_III010400 | TA15995 |           |             |           | K01897 | K01897 |        |        |        | BBM_I02785 | 2 | piro | 2 | 1 | K01897 | K01897 | long-chain acyl-CoA synthetase [EC:6.2.1.3]                   |
| BBOV_III010410 | TA15990 | PF08_0049 |             | YLR438C-A | K12622 | K12622 | K12622 |        | K12622 | BBM_I02790 | 4 | api+ | 4 | 1 | K12622 | K12622 | U6 snRNA-associated Sm-like protein LSm3                      |
| BBOV_III010420 | TA15885 |           |             |           |        |        |        |        |        | BBM_I02795 | 2 | piro | 0 | 0 | Valid  |        |                                                               |
|                |         |           |             |           |        |        |        |        |        | BBM_I02800 | 0 |      | 0 | 0 | NA     |        |                                                               |
| BBOV_III010440 | TA15775 | PFA_0290w | LmjF34.3080 |           |        |        |        | K12591 |        | BBM_I02805 | 4 | api+ | 1 | 1 | Valid  |        |                                                               |
| BBOV_III010450 | TA15770 | PFD0485w  | LmjF30.2250 | YBR267W   | K14816 | K14816 | K14816 | K14816 | K14816 | BBM_I02810 | 5 |      | 5 | 1 | K14816 | K14816 | RE11, pre-60S factor REI1                                     |
|                |         | PF11_0128 | LmjF09.1430 | YDR204W   |        |        |        |        |        | BBM_I02815 | 3 |      | 0 | 0 | NA     |        |                                                               |
|                |         |           |             |           |        |        |        |        |        | BBM_I02820 | 0 |      | 0 | 0 | NA     |        |                                                               |
|                | TA03725 | PF11_0165 |             | YNL239W   |        | K01376 |        |        | K01372 | BBM_I02825 | 3 |      | 2 | 2 | NA     |        |                                                               |
| BBOV_III010470 | TA15550 | PFD0462w  | L2256.05    |           | K03686 | K03686 | K03686 |        |        | BBM_I02830 | 4 | api+ | 3 | 1 | K03686 | K03686 | molecular chaperone DnaJ                                      |
| BBOV_III010480 | TA15495 | PFD0470c  | LmjF28.1820 | YAR007C   | K07466 | K07466 | K07466 | K07466 | K07466 | BBM_I02835 | 5 |      | 5 | 1 | K07466 | K07466 | replication factor A1                                         |
| BBOV_III010490 | TA15440 | PFL1150c  |             | YFL055W   | K02895 | K02895 |        |        |        | BBM_I02840 | 4 | api+ | 2 | 1 | Valid  |        |                                                               |
|                |         | PFL1145w  |             | YMR241W   |        |        |        |        |        | BBM_I02845 | 2 |      | 0 | 0 | NA     |        |                                                               |
| BBOV_III02070  | TA07935 | PFL1140w  | LmjF27.0210 | YLR220W   |        |        |        |        |        | BBM_I02850 | 5 |      | 0 | 0 | Valid  |        |                                                               |
|                |         |           |             |           |        |        |        |        |        | BBM_I02855 | 0 |      | 0 | 0 | NA     |        |                                                               |
| BBOV_III02050  | TA07925 | PFB0715w  | LmjF31.0160 | YOR151C   | K03010 | K03010 | K03010 | K03010 | K03010 | BBM_I02860 | 5 |      | 5 | 1 | K03010 | K03010 | DNA-directed RNA polymerase II subunit B [EC:2.7.7.6]         |
|                |         |           |             |           |        |        |        |        |        | BBM_I02865 | 0 |      | 0 | 0 | NA     |        |                                                               |
| BBOV_III02030  | TA07915 | PFC0675c  | L302.10     | YLR439W   |        |        |        |        |        | BBM_I02870 | 5 |      | 0 | 0 | Valid  |        |                                                               |
|                |         |           | LmjF33.0430 |           |        |        |        |        |        | BBM_I02875 | 1 |      | 0 | 0 | NA     |        |                                                               |
|                |         |           |             |           |        |        |        |        |        | BBM_I02880 | 0 |      | 0 | 0 | NA     |        |                                                               |
| BBOV_III001980 | TA07900 | PF11_0358 | LmjF25.0620 | YPR010C   | K03002 | K03002 | K03002 | K03002 | K03002 | BBM_I02885 | 5 |      | 5 | 1 | K03002 | K03002 | DNA-directed RNA polymerase I subunit A2 [EC:2.7.7.6]         |
| BBOV_III001990 | TA07885 | PF11_0359 | LmjF16.1180 | YFR051C   |        |        |        |        |        | BBM_I02890 | 5 |      | 0 | 0 | Valid  |        |                                                               |
|                |         | PF11820w  |             | YER188C-A |        |        | K13850 |        |        | BBM_I02895 | 2 |      | 1 | 1 | NA     |        |                                                               |
| BBOV_III002000 | TA07875 | PFF0465c  | LmjF34.2110 |           |        | K01005 | K01005 |        |        | BBM_I02900 | 4 | api+ | 2 | 1 | Valid  |        |                                                               |
|                |         |           |             | YOL152W   |        |        |        |        | K00521 | BBM_I02905 | 1 |      | 1 | 1 | NA     |        |                                                               |
| BBOV_III001940 | TA07865 | PFF0485c  |             | YNL326C   |        |        |        |        |        | BBM_I02910 | 4 | api+ | 0 | 0 | Valid  |        |                                                               |
| BBOV_III001930 | TA07860 | PFF0500c  | LmjF08.1180 | YDR088C   | K12819 | K12819 | K12819 | K12819 | K12819 | BBM_I02915 | 5 |      | 5 | 1 | K12819 | K12819 | pre-mRNA-processing factor SLU7                               |
| BBOV_III001920 | TA07855 | PFF0495w  | LmjF10.0320 | YCR046C   |        |        |        |        |        | BBM_I02920 | 5 |      | 0 | 0 | Valid  |        |                                                               |
| BBOV_III001910 | TA07850 | PFF0490w  |             | YGR047C   |        |        |        |        |        | BBM_I02925 | 4 | api+ | 0 | 0 | Valid  |        |                                                               |
| BBOV_III001900 | TA07845 | PFF0860c  |             | YDR225W   | K11251 | K11251 | K11251 |        | K11251 | BBM_I02927 | 4 | api+ | 4 | 1 | K11251 | K11251 | histone H2A                                                   |
| BBOV_III001890 | TA07840 | PFF0510w  | LmjF16.0610 | YNL031C   | K11253 | K11253 | K11253 | K11253 | K11253 | BBM_I02928 | 5 |      | 5 | 1 | K11253 | K11253 | histone H3                                                    |
| BBOV_III001880 | TA07830 | PFF0505c  | LmjF31.1030 |           |        |        |        |        |        | BBM_I02930 | 4 | api+ | 0 | 0 | Valid  |        |                                                               |
| BBOV_III001870 | TA08200 | PF11_0279 |             |           |        |        |        |        |        | BBM_I02935 | 3 | api  | 0 | 0 | Valid  |        |                                                               |
|                |         |           |             |           |        |        |        |        |        | BBM_I02940 | 0 |      | 0 | 0 | NA     |        |                                                               |
| BBOV_III001860 | TA08205 | PF08_0039 | LmjF36.4420 | YLR061W   | K02891 | K02891 | K02891 | K02891 | K02891 | BBM_I02945 | 5 |      | 5 | 1 | K02891 | K02891 | large subunit ribosomal protein L22e                          |
| BBOV_III001850 | TA08210 | PF11_0303 | LmjF32.2820 | YPR108W   | K03037 | K03037 | K03037 | K03037 | K03037 | BBM_I02950 | 5 |      | 5 | 1 | K03037 | K03037 | 26S proteasome regulatory subunit N7                          |
| BBOV_III001840 | TA08215 | PFD0880w  |             | YJR160C   |        |        |        |        | K08141 | BBM_I02955 | 4 | api+ | 1 | 1 | Valid  |        |                                                               |
|                |         |           |             |           |        |        |        |        |        | BBM_I02960 | 0 |      | 0 | 0 | NA     |        |                                                               |
| BBOV_V000410   | TA08225 | PF11_0297 | LmjF12.0350 |           |        |        | K12605 |        |        | BBM_I02965 | 4 | api+ | 1 | 1 | Valid  |        |                                                               |
|                |         |           |             |           |        |        |        |        |        | BBM_I02967 |   |      |   |   |        | Valid  | tRNA, Met, anticodon CAT                                      |
| BBOV_III001810 | TA08230 | PFL0880c  |             | YOR219C   |        |        |        |        | K08787 | BBM_I02970 | 4 | api+ | 1 | 1 | Valid  |        |                                                               |
|                |         |           | LmjF36.2370 |           |        |        |        |        |        | BBM_I02975 | 1 |      | 0 | 0 | NA     |        |                                                               |
| BBOV_III001780 | TA08240 | PFL0830w  | LmjF10.0700 | YPR112C   | K14787 | K14787 | K14787 | K14787 | K14787 | BBM_I02980 | 5 |      | 5 | 1 | K14787 | K14787 | MRD1, RBM19, multiple RNA-binding domain-containing protein 1 |
|                | TA08245 |           |             |           |        |        |        |        |        | BBM_I02985 | 1 |      | 0 | 0 | NA     |        |                                                               |
|                |         | PFL0820c  |             |           |        |        |        |        |        | BBM_I02990 | 1 |      | 0 | 0 | NA     |        |                                                               |

|               |         |             |             |         |        |        |        |        |        |            |   |      |   |   |        |        |                                                                      |
|---------------|---------|-------------|-------------|---------|--------|--------|--------|--------|--------|------------|---|------|---|---|--------|--------|----------------------------------------------------------------------|
| BBOV_I001770  | TA08255 | PFL0815w    |             |         | K09522 | K09522 | K09522 |        |        | BBM_I02995 | 3 | api  | 3 | 1 | K09522 | K09522 | DnaJ homolog subfamily C member 2                                    |
|               |         | PF11_0453   |             | YKL151C |        |        |        |        |        | BBM_I03000 | 2 |      | 0 | 0 | NA     |        |                                                                      |
| BBOV_I001750  | TA08265 | PF11_0062   |             |         | K11252 | K11252 | K11252 |        |        | BBM_I03005 | 3 | api  | 3 | 1 | K11252 | K11252 | histone H2B                                                          |
| BBOV_I001740  | TA17100 |             |             |         |        |        |        |        |        | BBM_I03010 | 2 | piro | 0 | 0 | Valid  |        |                                                                      |
| BBOV_I001730  | TA08295 | MAL13P1.96  | LmjF05.0400 | YFR031C | K06674 | K06674 | K06674 | K06674 | K06674 | BBM_I03015 | 5 |      | 5 | 1 | K06674 | K06674 | structural maintenance of chromosome 2                               |
|               | TA13580 |             |             |         |        |        |        |        |        | BBM_I03020 | 1 |      | 0 | 0 | NA     |        |                                                                      |
| BBOV_I005590  |         | MAL8P1.135  | LmjF22.0220 |         |        |        |        |        |        | BBM_I03025 | 3 |      | 0 | 0 | NA     |        |                                                                      |
| BBOV_I005690  | TA13645 | MAL8P1.134  | LmjF31.0680 |         |        |        |        |        |        | BBM_I03030 | 4 | api+ | 0 | 0 | Valid  |        |                                                                      |
| BBOV_I005630  | TA13600 | PF08_0115   |             |         |        |        |        |        |        | BBM_I03035 | 3 | api  | 0 | 0 | Valid  |        |                                                                      |
| BBOV_I005650  | TA13605 | PF14_0502   |             | YDL087C |        |        |        |        |        | BBM_I03040 | 4 | api+ | 0 | 0 | Valid  |        |                                                                      |
| BBOV_I005660  | TA13610 | PF0100w     | LmjF36.3000 | YJL050W | K12598 | K12598 | K12598 | K12598 | K12598 | BBM_I03045 | 5 |      | 5 | 1 | K12598 | K12598 | MTR4, SKIV2L2, ATP-dependent RNA helicase DOB1 [EC:3.6.4.13]         |
| BBOV_I005670  | TA13625 |             |             | YBR001C |        |        |        |        | K01194 | BBM_I03050 | 3 |      | 1 | 1 | NA     |        |                                                                      |
|               |         |             |             |         |        |        |        |        |        | BBM_I03055 | 0 |      | 0 | 0 | NA     |        |                                                                      |
|               |         |             |             |         |        |        |        |        |        | BBM_I03060 | 0 |      | 0 | 0 | NA     |        |                                                                      |
| BBOV_I005680  | TA13640 | PFE0610c    | LmjF36.6220 | YDR460W |        |        | K10842 |        | K10842 | BBM_I03065 | 5 |      | 2 | 1 | K10842 | K10842 | CDK-activating kinase assembly factor MAT1                           |
|               | TA13595 |             |             |         |        |        |        |        |        | BBM_I03070 | 1 |      | 0 | 0 | NA     |        |                                                                      |
| BBOV_I005600  | TA13585 | PFB0875c    | LmjF15.1030 | YAL032C | K06063 | K06063 | K06063 |        | K06063 | BBM_I03075 | 5 |      | 4 | 1 | K06063 | K06063 | SNW domain-containing protein 1                                      |
| BBOV_I005490  | TA13520 | PF14_0183b  |             | YJL033W |        |        |        |        | K14776 | BBM_I03080 | 4 | api+ | 1 | 1 | Valid  |        |                                                                      |
| BBOV_I005480  | TA13515 | PFL1085w    | LmjF32.2410 |         |        |        |        |        |        | BBM_I03085 | 4 | api+ | 0 | 0 | Valid  |        |                                                                      |
|               |         |             |             |         |        |        |        |        |        | BBM_I03090 | 0 |      | 0 | 0 | NA     |        |                                                                      |
| BBOV_IV010900 |         |             |             | YOR137C |        |        |        |        |        | BBM_I03095 | 2 |      | 0 | 0 | NA     |        |                                                                      |
| BBOV_I005470  | TA13510 | PFL1090w    |             |         |        |        |        |        |        | BBM_I03100 | 3 | api  | 0 | 0 | Valid  |        |                                                                      |
|               |         |             |             |         |        |        |        |        |        | BBM_I03105 | 0 |      | 0 | 0 | NA     |        |                                                                      |
| BBOV_I005440  |         |             |             | YGR070W |        |        |        |        |        | BBM_I03110 | 2 |      | 0 | 0 | NA     |        |                                                                      |
| BBOV_I005430  | TA13500 | PFL1110c    | LmjF13.0160 | YIL033C | K04739 | K04739 | K04739 |        | K04739 | BBM_I03115 | 5 |      | 4 | 1 | K04739 | K04739 | cAMP-dependent protein kinase regulator                              |
| BBOV_I005420  | TA13495 |             | LmjF11.1200 | YKR051W |        |        |        |        |        | BBM_I03120 | 4 |      | 0 | 0 | NA     |        |                                                                      |
| BBOV_I005410  | TA13490 | MAL13P1.100 |             |         |        |        |        |        |        | BBM_I03125 | 3 | api  | 0 | 0 | Valid  |        |                                                                      |
| BBOV_I005400  | TA13485 | MAL13P1.102 |             |         |        |        |        |        |        | BBM_I03130 | 3 | api  | 0 | 0 | Valid  |        |                                                                      |
| BBOV_I005390  | TA13480 | PF13_0102   |             | YOR254C | K09540 | K09540 | K09540 |        | K09540 | BBM_I03135 | 4 | api+ | 4 | 1 | K09540 | K09540 | translocation protein SEC63                                          |
| BBOV_I005380  | TA13475 | PF13_0106   | LmjF25.1460 | YGL082W |        |        |        |        |        | BBM_I03140 | 5 |      | 0 | 0 | Valid  |        |                                                                      |
| BBOV_I005370  | TA15435 |             |             |         |        |        |        |        |        | BBM_I03145 | 2 | piro | 0 | 0 | Valid  |        |                                                                      |
| BBOV_I005350  | TA15430 | PF10370c    |             |         | K06697 | K06697 | K06697 |        |        | BBM_I03150 | 3 | api  | 3 | 1 | K06697 | K06697 | proteasome activator subunit 2 (PA28 beta)                           |
| BBOV_I005340  | TA15425 | PF14_0100   | LmjF20.0560 | YJR103W | K01937 | K01937 | K01937 | K01937 | K01937 | BBM_I03155 | 5 |      | 5 | 1 | K01937 | K01937 | CTP synthase [EC:6.3.4.2]                                            |
| BBOV_I005330  | TA15420 | PF14_0366   | LmjF22.0390 | YIR008C | K02684 | K02684 | K02684 | K02684 | K02684 | BBM_I03160 | 5 |      | 5 | 1 | K02684 | K02684 | DNA primase small subunit [EC:2.7.7.-]                               |
|               |         |             |             |         |        |        |        |        |        | BBM_I03162 |   |      |   |   | Valid  |        | trRNA, Met, anticodon CAT                                            |
| BBOV_I005310  |         | PFE0435c    | LmjF36.0700 |         | K03111 |        | K03111 |        |        | BBM_I03165 | 3 |      | 2 | 1 | NA     |        |                                                                      |
| BBOV_I005300  |         | MAL13P1.85  | LmjF36.6640 |         |        |        |        |        |        | BBM_I03170 | 3 |      | 0 | 0 | NA     |        |                                                                      |
| BBOV_I005290  | TA15410 | PF13_0090   |             |         |        |        | K03864 |        |        | BBM_I03180 | 3 | api  | 1 | 1 | Valid  |        |                                                                      |
|               |         | MAL13P1.83  | LmjF02.0110 | YOL076W |        |        | K14288 | K14288 |        | BBM_I03185 | 3 |      | 2 | 1 | NA     |        |                                                                      |
| BBOV_I005270  | TA15395 | PF13_0088   |             |         |        |        |        |        |        | BBM_I03190 | 3 | api  | 0 | 0 | Valid  |        |                                                                      |
| BBOV_I005260  | TA15390 | PF13_0087   | LmjF28.2400 | YJL125C | K07442 |        | K07442 |        | K07442 | BBM_I03195 | 5 |      | 3 | 1 | K07442 | K07442 | tRNA (adenine-N1-)-methyltransferase catalytic subunit [EC:2.1.1.36] |
| BBOV_I005250  | TA15380 | MAL13P1.82  | LmjF26.2480 | YPR113W | K00999 | K00999 | K00999 | K00999 | K00999 | BBM_I03200 | 5 |      | 5 | 1 | K00999 | K00999 | CDP-diacylglycerol--inositol 3-phosphatidyltransferase [EC:2.7.8.11] |
| BBOV_I005240  | TA15375 | PFE0445c    | LmjF32.2890 | YBL050W |        |        |        |        |        | BBM_I03205 | 5 |      | 0 | 0 | Valid  |        |                                                                      |
| BBOV_I005230  | TA15370 | PF13_0091   | LmjF30.1090 | YKL012W | K12821 |        | K12821 |        | K12821 | BBM_I03210 | 5 |      | 3 | 1 | K12821 | K12821 | pre-mRNA-processing factor 40                                        |
| BBOV_I005220  | TA15365 | MAL13P1.86  |             | YGR202C | K00968 | K00968 | K00968 |        | K00968 | BBM_I03215 | 4 | api+ | 4 | 1 | K00968 | K00968 | choline-phosphate cytidylyltransferase [EC:2.7.7.15]                 |
| BBOV_I005210  | TA15360 | MAL13P1.87  |             |         |        |        |        |        |        | BBM_I03220 | 3 | api  | 0 | 0 | Valid  |        |                                                                      |
|               |         |             |             |         |        |        |        |        |        | BBM_I03225 | 0 |      | 0 | 0 | NA     |        |                                                                      |
|               |         |             |             |         |        |        |        |        |        | BBM_I03230 | 0 |      | 0 | 0 | NA     |        |                                                                      |
| BBOV_I005190  | TA15345 | MAL13P1.88  |             | YGR108W |        |        |        |        | K02220 | BBM_I03235 | 4 | api+ | 1 | 1 | Valid  |        |                                                                      |
|               |         |             |             |         |        |        |        |        |        | BBM_I03240 | 0 |      | 0 | 0 | NA     |        |                                                                      |
| BBOV_I005180  | TA15335 | PF13_0096   |             | YFR005C | K12847 | K12847 | K12847 |        | K12847 | BBM_I03245 | 4 | api+ | 4 | 1 | K12847 | K12847 | U4/U6.U5 tri-snRNP-associated protein 2                              |
| BBOV_I005170  | TA15330 |             |             |         |        |        |        |        |        | BBM_I03250 | 2 | piro | 0 | 0 | Valid  |        |                                                                      |
| BBOV_I005160  | TA17345 | PF13_0095   | LmjF09.0250 | YPR019W | K02212 | K02212 | K02212 | K02212 | K02212 | BBM_I03255 | 5 |      | 5 | 1 | K02212 | K02212 | minichromosome maintenance protein 4 (cell division control protein  |
|               |         |             |             |         |        |        |        |        |        | BBM_I03257 | 0 |      | 0 | 0 | NA     |        |                                                                      |

|              |         |             |             |           |        |        |        |        |        |            |   |      |   |   |        |        |                                                                      |
|--------------|---------|-------------|-------------|-----------|--------|--------|--------|--------|--------|------------|---|------|---|---|--------|--------|----------------------------------------------------------------------|
| BBOV_I005150 | TA17340 | MAL13P1.89  |             |           |        |        |        |        |        | BBM_I03260 | 3 | api  | 0 | 0 | Valid  |        |                                                                      |
| BBOV_I005140 | TA17335 | MAL13P1.90  |             |           |        |        |        |        |        | BBM_I03265 | 3 | api  | 0 | 0 | Valid  |        |                                                                      |
| BBOV_I005130 | TA17330 | MAL13P1.93  | LmjF34.0740 | YPR144C   | K14771 |        |        | K14771 | K14771 | BBM_I03270 | 5 |      | 3 | 1 | K14771 | K14771 | NOC4, UTP19, U3 small nucleolar RNA-associated protein 19            |
|              | TA17325 |             | LmjF27.0960 |           |        |        |        |        |        | BBM_I03275 | 2 |      | 0 | 0 | NA     |        |                                                                      |
| BBOV_I005100 | TA17315 | PF14_0369   |             | YPR124W   | K14686 |        | K14686 |        |        | BBM_I03280 | 4 | api+ | 2 | 1 | Valid  | Valid  | BMN1-20                                                              |
| BBOV_I005090 | TA17310 | MAL13P1.92  | LmjF22.0460 | YOL040C   | K02958 | K02958 | K02958 | K02958 | K02958 | BBM_I03285 | 5 |      | 5 | 1 | K02958 | K02958 | small subunit ribosomal protein S15e                                 |
| BBOV_I005080 | TA17305 | MAL13P1.95  |             |           | K02639 | K02639 | K02639 |        |        | BBM_I03290 | 3 | api  | 3 | 1 | K02639 | K02639 | ferredoxin                                                           |
|              |         | PF14_0098   |             | YJR088C   |        |        |        |        |        | BBM_I03295 | 2 |      | 0 | 0 | NA     |        |                                                                      |
| BBOV_I005070 | TA17300 | PF14_0097   | LmjF26.1620 | YBR029C   | K00981 | K00981 | K00981 | K00981 | K00981 | BBM_I03300 | 5 |      | 5 | 1 | K00981 | K00981 | phosphatidate cytidyltransferase [EC:2.7.7.41]                       |
|              |         |             |             |           |        |        |        |        |        | BBM_I03301 |   |      |   |   | Valid  |        | tRNA, Arg, anticodon ACG                                             |
|              |         |             |             |           |        |        |        |        |        | BBM_I03302 |   |      |   |   | Valid  |        | tRNA, Arg, anticodon TCG                                             |
|              |         |             |             |           |        |        |        |        |        | BBM_I03303 | 0 |      | 0 | 0 | NA     |        |                                                                      |
| BBOV_I005040 | TA17295 | PF14_0041   | LmjF14.0950 | YBL038W   |        |        |        |        |        | BBM_I03305 | 5 |      | 0 | 0 | Valid  |        |                                                                      |
| BBOV_I005030 | TA17290 |             | LmjF34.1470 | YPL002C   | K12188 | K12188 |        | K12188 | K12188 | BBM_I03310 | 4 |      | 4 | 1 | K12188 | K12188 | ESCRT-II complex subunit VPS22                                       |
| BBOV_I005020 | TA17280 | PFE1470w    | LmjF11.0180 | YER007C-A | K07575 | K07575 | K07575 | K07575 | K07575 | BBM_I03315 | 5 |      | 5 | 1 | K07575 | K07575 | PUA domain protein                                                   |
| BBOV_I005010 |         | PF1055w     |             | YDL176W   |        |        |        |        |        | BBM_I03320 | 3 |      | 0 | 0 | NA     |        |                                                                      |
|              | TA17270 | PFE1460w    |             |           |        |        |        |        |        | BBM_I03325 | 2 |      | 0 | 0 | NA     |        |                                                                      |
| BBOV_I005000 |         | PFE1450c    |             | YKR101W   |        |        |        |        | K11120 | BBM_I03330 | 3 |      | 1 | 1 | NA     |        |                                                                      |
| BBOV_I004990 | TA17265 | PFE1445c    | LmjF28.2450 |           |        |        |        |        |        | BBM_I03335 | 4 | api+ | 0 | 0 | Valid  |        |                                                                      |
|              |         |             |             | YER006W   |        |        |        |        | K14538 | BBM_I03340 | 1 |      | 1 | 1 | NA     |        |                                                                      |
| BBOV_I004970 | TA17250 | PF14_0368   | LmjF15.1040 | YML028W   | K03386 | K00435 | K03386 | K11185 | K03386 | BBM_I03345 | 5 |      | 5 | 3 | NA     | K03386 | peroxiredoxin (alkyl hydroperoxide reductase subunit C)              |
| BBOV_I004960 | TA17245 | PF14_0656   | LmjF03.0520 |           | K12837 | K12837 | K12837 |        |        | BBM_I03350 | 4 | api+ | 3 | 1 | K12837 | K12837 | splicing factor U2AF 65 kDa subunit                                  |
|              | TA17240 |             | LmjF08.0270 |           |        |        |        |        |        | BBM_I03355 | 2 |      | 0 | 0 | NA     |        |                                                                      |
| BBOV_I004950 | TA17235 | PF13_0287   | LmjF13.1190 | YNL220W   | K01939 | K01939 | K01939 | K01939 | K01939 | BBM_I03360 | 5 |      | 5 | 1 | K01939 | K01939 | adenylosuccinate synthase [EC:6.3.4.4]                               |
| BBOV_I004940 | TA17230 | PFC0300c    | LmjF26.0180 | YGL076C   |        |        | K02937 | K02937 | K02937 | BBM_I03365 | 5 |      | 3 | 1 | K02937 | K02937 | large subunit ribosomal protein L7e                                  |
| BBOV_I001040 | TA20110 | PF14_0657   |             |           |        |        |        |        |        | BBM_I03370 | 3 | api  | 0 | 0 | Valid  |        |                                                                      |
|              |         | PF14_0658   |             | YCR017C   |        |        | K03236 |        |        | BBM_I03375 | 2 |      | 1 | 1 | NA     |        |                                                                      |
| BBOV_I000300 |         | PFE0330w    | LmjF36.6080 | YPL249C   |        |        |        |        |        | BBM_I03380 | 4 |      | 0 | 0 | NA     | Valid  | TBC domain containing protein                                        |
| BBOV_I000310 | TA20125 |             |             | YBR126C   |        | K01087 |        |        | K00697 | BBM_I03385 | 3 |      | 2 | 2 | NA     |        |                                                                      |
| BBOV_I005110 |         |             |             |           |        |        |        |        |        | BBM_I03390 | 1 |      | 0 | 0 | NA     |        |                                                                      |
|              |         |             |             |           |        |        |        |        |        | BBM_I03392 |   |      |   |   | Valid  |        | tRNA, Leu, anticodon CAA                                             |
|              |         |             |             |           |        |        |        |        |        | BBM_I03393 | 0 |      | 0 | 0 | NA     |        |                                                                      |
| BBOV_I000320 | TA20135 | MAL13P1.145 | LmjF35.4120 |           |        |        |        |        |        | BBM_I03395 | 4 | api+ | 0 | 0 | Valid  |        |                                                                      |
| BBOV_I000340 | TA20140 | MAL13P1.144 |             |           | K03241 | K03241 | K03241 |        |        | BBM_I03400 | 3 | api  | 3 | 1 | K03241 | K03241 | translation initiation factor eIF-2B gamma subunit                   |
| BBOV_I000350 | TA20145 | PF13_0147   | LmjF35.3200 |           |        |        |        |        |        | BBM_I03405 | 4 | api+ | 0 | 0 | Valid  |        |                                                                      |
| BBOV_I000360 |         |             | LmjF28.1780 |           | K03165 |        |        | K03165 |        | BBM_I03410 | 2 |      | 2 | 1 | NA     |        |                                                                      |
| BBOV_I004920 |         |             | LmjF14.0840 | YJR035W   | K10841 |        |        | K10841 | K10841 | BBM_I03415 | 3 |      | 3 | 1 | K10841 | K10841 | DNA excision repair protein ERCC-6                                   |
| BBOV_I004930 | TA17225 | PFD0665c    | LmjF12.0210 | YDR394W   | K03063 | K03063 | K03063 | K03063 | K03063 | BBM_I03420 | 5 |      | 5 | 1 | K03063 | K03063 | 26S proteasome regulatory subunit T3                                 |
| BBOV_I009970 | TA11630 | PFF0285c    | LmjF28.0530 | YNL250W   | K10866 | K10866 | K10866 | K10866 | K10866 | BBM_I03425 | 5 |      | 5 | 1 | K10866 | K10866 | DNA repair protein RAD50 [EC:3.6.-.-]                                |
| BBOV_I009960 | TA11640 | PFF0305c    | LmjF07.0850 | YGR133W   | K10689 | K10689 | K10689 | K10689 | K10689 | BBM_I03430 | 5 |      | 5 | 1 | K10689 | K10689 | peroxin-4 [EC:6.3.2.19]                                              |
|              |         | PFF0320c    | L1156.07    |           |        |        |        |        |        | BBM_I03435 | 2 |      | 0 | 0 | NA     |        |                                                                      |
|              |         |             |             |           |        |        |        |        |        | BBM_I03440 | 0 |      | 0 | 0 | NA     |        |                                                                      |
| BBOV_I009950 | TA11660 | PFF0330w    | LmjF34.4310 | YDL145C   | K05236 | K05236 | K05236 | K05236 | K05236 | BBM_I03445 | 5 |      | 4 | 1 | K05236 | K05236 | coatomer protein complex, subunit alpha (xenin)                      |
| BBOV_I007110 |         | PFF0205w    |             | YBR282W   |        |        |        |        |        | BBM_I03450 | 3 |      | 0 | 0 | NA     |        |                                                                      |
| BBOV_I007120 | TA11665 | PFF0200c    |             |           |        |        |        |        |        | BBM_I03455 | 3 | api  | 0 | 0 | Valid  |        |                                                                      |
|              |         |             |             | YOR073W   |        |        |        |        | K11582 | BBM_I03460 | 1 |      | 1 | 1 | NA     |        |                                                                      |
| BBOV_I007180 | TA11690 | PFF0185c    | LmjF31.0600 |           |        |        |        |        |        | BBM_I03465 | 4 | api+ | 0 | 0 | Valid  |        |                                                                      |
| BBOV_I007170 | TA11685 | PFF0180w    |             | YPR047W   | K01889 | K01889 | K01889 |        | K01889 | BBM_I03470 | 4 | api+ | 4 | 1 | K01889 | K01889 | phenylalanyl-tRNA synthetase alpha chain [EC:6.1.1.20]               |
|              |         |             |             |           |        |        |        |        |        | BBM_I03475 | 0 |      | 0 | 0 | NA     |        |                                                                      |
|              |         |             | LmjF15.1350 |           |        |        |        |        |        | BBM_I03480 | 1 |      | 0 | 0 | NA     |        |                                                                      |
| BBOV_I007140 | TA11675 |             |             |           | K12618 | K12618 |        |        |        | BBM_I03485 | 2 | piro | 2 | 1 | K12618 | K12618 | XRN1, SEP1, KEM1, 5'-3' exoribonuclease 1 [EC:3.1.13.-               |
| BBOV_I007190 | TA11695 | PFF0160c    | LmjF16.0530 | YKL216W   | K00226 | K00226 | K00226 | K00226 | K00226 | BBM_I03490 | 5 |      | 5 | 1 | K00226 | K00254 | dihydroorotate dehydrogenase [EC:1.3.5.2] (kegg annotation error for |
| BBOV_I007200 | TA11700 | PFC0140c    | LmjF20.0810 | YBR080C   | K06027 | K06027 | K06027 | K06027 | K06027 | BBM_I03495 | 5 |      | 5 | 1 | K06027 | K06027 | vesicle-fusing ATPase [EC:3.6.4.6]                                   |
|              | TA11710 | PF14_0379   |             |           |        |        |        |        |        | BBM_I03500 | 2 |      | 0 | 0 | NA     |        |                                                                      |



|                |         |             |             |         |        |        |        |        |        |            |   |      |   |   |        |        |                                                                        |
|----------------|---------|-------------|-------------|---------|--------|--------|--------|--------|--------|------------|---|------|---|---|--------|--------|------------------------------------------------------------------------|
| BBOV_IV001220  | TA19100 | PF14_0430   | LmjF12.0040 | YGL085W |        |        |        |        |        | BBM_I00230 | 5 |      | 0 | 0 | Valid  |        |                                                                        |
| BBOV_IV001230  | TA19110 | PF14_0431   | LmjF09.0400 | YLL019C | K08287 | K08287 | K08287 | K08287 | K08287 | BBM_I00235 | 5 |      | 5 | 1 | K08287 | K08287 | dual-specificity kinase [EC:2.7.12.1]                                  |
|                |         | PF14_0427   | LmjF14.1360 |         |        |        |        |        | K01858 | BBM_I00240 | 2 |      | 1 | 1 | NA     |        |                                                                        |
| BBOV_IV001250  | TA19120 |             |             | YDR032C |        |        |        |        |        | BBM_I00245 | 3 |      | 0 | 0 | NA     |        |                                                                        |
| BBOV_I001500   | TA08445 |             |             |         |        |        |        |        |        | BBM_I00250 | 2 | piro | 0 | 0 | Valid  |        |                                                                        |
|                |         |             |             |         |        |        |        |        |        | BBM_I00255 | 0 |      | 0 | 0 | NA     |        |                                                                        |
| BBOV_IV001260  | TA19130 | PFI1625c    | LmjF01.0650 | YLR163C | K01412 | K01412 | K01412 | K01412 | K01412 | BBM_I00260 | 5 |      | 5 | 1 | K01412 | K01412 | mitochondrial processing peptidase [EC:3.4.24.64]                      |
| BBOV_IV001280  | TA19145 | PF11_0341   | L2743.01    |         |        |        |        |        |        | BBM_I00265 | 4 | api+ | 0 | 0 | Valid  |        |                                                                        |
| BBOV_IV001290  | TA19140 | PFI1655c    |             |         |        |        |        |        |        | BBM_I00270 | 3 | api  | 0 | 0 | Valid  |        |                                                                        |
| BBOV_IV001300  | TA19155 | PFI1650w    | LmjF24.2280 | YER171W | K10844 | K10844 | K10844 | K10844 | K10844 | BBM_I00275 | 5 |      | 5 | 1 | K10844 | K10844 | DNA excision repair protein ERCC-2 [EC:3.6.1.-]                        |
| BBOV_IV001310  | TA19160 | PFI1680w    | LmjF35.1970 | YDL091C |        |        |        |        |        | BBM_I00280 | 5 |      | 0 | 0 | Valid  |        |                                                                        |
|                |         | PFF0155w    | LmjF34.1330 | YDR375C |        |        |        |        | K08900 | BBM_I00285 | 3 |      | 2 | 1 | NA     |        |                                                                        |
| BBOV_IV001320  | TA19180 | PF10_0306   | LmjF30.3310 | YNR020C |        |        |        |        |        | BBM_I00290 | 5 |      | 0 | 0 | Valid  |        |                                                                        |
|                |         |             |             |         |        |        |        |        |        | BBM_I00295 | 0 |      | 0 | 0 | NA     |        |                                                                        |
| BBOV_IV001330  | TA19190 | PF10_0266   | LmjF29.0750 | YJR002W | K14559 | K14559 | K14559 | K14559 | K14559 | BBM_I00300 | 5 |      | 5 | 1 | K14559 | K14559 | MPP10, U3 small nucleolar RNA-associated protein MPP10                 |
| BBOV_IV001340  | TA19195 | PFL0770w    |             |         | K01875 | K01875 | K01875 |        |        | BBM_I00305 | 3 | api  | 3 | 1 | K01875 | K01875 | seryl-tRNA synthetase [EC:6.1.1.11]                                    |
|                |         |             |             |         |        |        |        |        |        | BBM_I00310 | 0 |      | 0 | 0 | NA     |        |                                                                        |
| BBOV_IV001360  | TA19205 | PFL0785c    | LmjF19.1600 | YML105C | K03105 | K03105 | K03105 | K03105 | K03105 | BBM_I00315 | 5 |      | 5 | 1 | K03105 | K03105 | signal recognition particle subunit SRP19                              |
| BBOV_IV001370  | TA19210 | PFD0430c    | LmjF32.1965 | YNL033W | K13834 |        | K13834 |        |        | BBM_I00320 | 5 |      | 2 | 1 | K13834 | K13834 | sporozoite microneme protein 2                                         |
| BBOV_IV001380  |         |             | LmjF09.1200 |         |        |        |        |        |        | BBM_I00325 | 2 |      | 0 | 0 | NA     |        |                                                                        |
| BBOV_IV001390  | TA19220 | PFL0670c    | LmjF18.1220 | YHR020W | K01881 | K01881 | K01881 | K01881 | K01881 | BBM_I00330 | 5 |      | 5 | 1 | K01881 | K01881 | prolyl-tRNA synthetase [EC:6.1.1.15]                                   |
| BBOV_IV001400  | TA19225 | PFL0675c    |             | YDR211W | K03240 | K03240 |        |        | K03240 | BBM_I00335 | 4 | api+ | 3 | 1 | K03240 | K03240 | translation initiation factor eIF-2B epsilon subunit                   |
| BBOV_IV001410  | TA19230 | PFL0680c    |             |         |        |        |        |        |        | BBM_I00340 | 3 | api  | 0 | 0 | Valid  |        |                                                                        |
| BBOV_IV001420  | TA19235 | PFL0685w    | LmjF24.0340 | YLL031C |        |        |        |        | K05288 | BBM_I00345 | 5 |      | 2 | 1 | K05288 | K05288 | phosphatidylinositol glycan, class O                                   |
| BBOV_IV001440  |         |             |             |         | K05956 |        |        |        |        | BBM_I00350 | 1 |      | 1 | 1 | NA     |        |                                                                        |
|                |         |             |             |         |        |        |        |        |        | BBM_I00355 | 0 |      | 0 | 0 | NA     |        |                                                                        |
|                | TA19245 |             |             |         |        |        |        |        |        | BBM_I00360 | 1 |      | 0 | 0 | NA     |        |                                                                        |
| BBOV_IV001460  | TA19250 | PFL0705c    | LmjF26.1050 | YPL252C |        |        |        |        |        | BBM_I00365 | 5 |      | 0 | 0 | Valid  |        |                                                                        |
| BBOV_IV001470  | TA19255 | PFL0710w    |             |         |        |        |        |        |        | BBM_I00370 | 3 | api  | 0 | 0 | Valid  |        |                                                                        |
|                |         |             | LmjF32.1040 |         |        |        |        |        |        | BBM_I00375 | 1 |      | 0 | 0 | NA     |        |                                                                        |
| BBOV_IV001480  | TA19265 | PFL0720w    |             |         |        |        |        |        |        | BBM_I00380 | 3 | api  | 0 | 0 | Valid  |        |                                                                        |
| BBOV_I004500   | TA19270 |             |             |         |        | K03386 |        |        |        | BBM_I00385 | 2 | piro | 1 | 1 | Valid  | Valid  | peroxiredoxin Q/BCP [EC:1.11.1.15] / antioxidant, AhpC/TSA family      |
| BBOV_I004490   | TA19340 | PFL0735w    |             |         |        | K01802 | K01802 |        |        | BBM_I00390 | 3 | api  | 2 | 1 | Valid  |        |                                                                        |
| BBOV_I004480   |         | PFL0740c    | LmjF26.0620 | YOR020C | K04078 |        | K04078 | K04078 | K04078 | BBM_I00395 | 4 |      | 4 | 1 | K04078 | K04078 | chaperonin GroES                                                       |
| BBOV_I004470   | TA19325 | PF14_0161   | LmjF13.1390 | YPL103C |        |        |        |        |        | BBM_I00400 | 5 |      | 0 | 0 | Valid  |        |                                                                        |
| BBOV_I004460   | TA19320 | PF10_0144   | LmjF35.0070 | YGR231C |        |        |        |        |        | BBM_I00405 | 5 |      | 0 | 0 | Valid  |        |                                                                        |
| BBOV_I004450   | TA19315 | PF14_0676   | LmjF36.0320 | YER012W | K02734 | K02734 | K02734 | K02734 | K02734 | BBM_I00410 | 5 |      | 5 | 1 | K02734 | K02734 | 20S proteasome subunit beta 4 [EC:3.4.25.1]                            |
| BBOV_I004440   | TA19310 |             |             | YGL107C | K03108 | K03108 |        |        |        | BBM_I00415 | 3 |      | 2 | 1 | NA     |        |                                                                        |
| BBOV_I004430   | TA19305 | PFE0270c    |             | YDR097C | K08737 | K08737 | K08737 |        | K08737 | BBM_I00420 | 4 | api+ | 4 | 1 | K08737 | K08737 | DNA mismatch repair protein MSH6                                       |
|                |         | PFL2300w    | LmjF14.0730 | YLR105C |        |        |        |        | K01170 | BBM_I00425 | 3 |      | 1 | 1 | NA     |        |                                                                        |
| BBOV_I004420   | TA19300 | PFL2295w    | LmjF19.0670 | YKL099C |        |        |        |        | K14769 | BBM_I00430 | 5 |      | 1 | 1 | K14769 | K14769 | UTP11, U3 small nucleolar RNA-associated protein 11                    |
| BBOV_I004410   | TA19295 | MAL13P1.182 |             |         |        |        |        |        |        | BBM_I00435 | 3 | api  | 0 | 0 | Valid  |        |                                                                        |
| BBOV_I004400   | TA19290 | MAL13P1.183 |             |         | K14546 | K14546 |        |        |        | BBM_I00440 | 3 | api  | 2 | 1 | Valid  |        |                                                                        |
| BBOV_I0004040  | TA19285 | PF14_0519   |             |         |        |        |        |        |        | BBM_I00445 | 3 | api  | 0 | 0 | Valid  |        |                                                                        |
| BBOV_IV0004050 | TA19345 | PF14_0518   | LmjF35.3620 | YPL135W | K04488 | K04488 | K04488 | K04488 |        | BBM_I00450 | 5 |      | 4 | 1 | K04488 | K04488 | nitrogen fixation protein NifU and related proteins                    |
| BBOV_IV0004060 | TA19350 | PF14_0520   | LmjF35.3340 | YGR256W | K00033 | K00033 | K00033 | K00033 | K00033 | BBM_I00455 | 5 |      | 5 | 1 | K00033 | K00033 | 6-phosphogluconate dehydrogenase [EC:1.1.1.44]                         |
|                |         |             |             |         |        |        |        |        |        | BBM_I00460 | 0 |      | 0 | 0 | NA     |        |                                                                        |
| BBOV_IV0004070 | TA19360 | PFE0265c    | LmjF15.0800 |         |        |        |        |        |        | BBM_I00465 | 4 | api+ | 0 | 0 | Valid  |        |                                                                        |
|                | TA20095 |             |             |         |        |        |        |        |        | BBM_I00470 | 1 |      | 0 | 0 | NA     |        |                                                                        |
| BBOV_IV0004100 | TA19370 | PFE0665c    | LmjF32.3020 | YDR336W | K03978 | K03978 |        |        |        | BBM_I00475 | 5 |      | 2 | 1 | K03978 | K03978 | GTP-binding protein                                                    |
| BBOV_IV0005370 | TA19380 | PF08_0075   | LmjF29.2460 | YDL082W | K02873 | K02873 | K02873 | K02873 | K02873 | BBM_I00480 | 5 |      | 5 | 1 | K02873 | K02873 | large subunit ribosomal protein L13e                                   |
| BBOV_IV0005360 | TA19385 | PF08_0076   | LmjF26.0890 | YMR143W | K02960 | K02960 | K02960 | K02960 | K02960 | BBM_I00485 | 5 |      | 5 | 1 | K02960 | K02960 | small subunit ribosomal protein S16e                                   |
| BBOV_IV0005350 | TA19395 | PF13_0061   | LmjF21.1770 | YBR039W | K02136 | K02136 | K02136 | K02136 | K02136 | BBM_I00490 | 5 |      | 5 | 1 | K02136 | K02136 | F-type H <sup>+</sup> -transporting ATPase subunit gamma [EC:3.6.3.14] |
| BBOV_IV0005340 | TA19400 | MAL13P1.54  |             |         | K13111 | K13111 | K13111 |        |        | BBM_I00495 | 3 | api  | 3 | 1 | K13111 | K13111 | WD40 repeat-containing protein SMU1                                    |

|               |         |             |             |         |        |        |        |        |             |             |      |      |   |        |        |        |
|---------------|---------|-------------|-------------|---------|--------|--------|--------|--------|-------------|-------------|------|------|---|--------|--------|--------|
| BBOV_IV005330 | TA19405 | PFF0785w    | LmjF35.0750 |         | K11547 | K11547 | K11547 |        |             | BBM_I100500 | 4    | api+ | 3 | 1      | K11547 | K11547 |
| BBOV_IV005320 | TA19410 | PFL0745c    |             |         |        |        |        |        |             | BBM_I100505 | 3    | api  | 0 | 0      | Valid  |        |
|               |         | PF11_0304   |             |         |        |        |        |        |             | BBM_I100510 | 1    |      | 0 | 0      | NA     |        |
|               |         |             |             |         |        |        |        |        |             | BBM_I100515 | 0    |      | 0 | 0      | NA     |        |
|               |         |             |             |         |        |        |        |        |             | BBM_I100520 | 0    |      | 0 | 0      | NA     |        |
| BBOV_IV005290 | TA19425 | PFL0635c    |             | YDL001W |        |        |        |        |             | BBM_I100525 | 4    | api+ | 0 | 0      | Valid  |        |
| BBOV_IV005280 | TA19430 | PFL0630w    | LmjF23.1410 | YLL041C | K00235 | K00235 | K00235 | K00235 | BBM_I100530 | 5           |      | 4    | 1 | K00235 | K00235 |        |
| BBOV_IV005270 | TA19435 | PFD0460c    |             |         |        |        |        |        | BBM_I100535 | 3           | api  | 0    | 0 | Valid  |        |        |
| BBOV_IV005250 | TA19455 | PF13_0136   |             | YDR361C |        |        |        |        | BBM_I100540 | 4           | api+ | 0    | 0 | Valid  |        |        |
| BBOV_IV005240 | TA19460 | PF14_0268   |             |         |        |        |        |        | BBM_I100545 | 3           | api  | 0    | 0 | Valid  |        |        |
| BBOV_IV005230 | TA19465 | PF14_0229   |             |         |        |        |        |        | BBM_I100550 | 3           | api  | 0    | 0 | Valid  |        |        |
| BBOV_IV005220 | TA19470 | PF14_0224   | LmjF12.0660 |         | K01090 | K01090 | K01090 |        | BBM_I100555 | 4           | api+ | 3    | 1 | K01090 | K01090 |        |
| BBOV_IV005210 | TA19475 | PFL0615w    |             |         |        |        |        |        | BBM_I100560 | 3           | api  | 0    | 0 | Valid  |        |        |
| BBOV_IV005200 | TA19480 | PFL0620c    | LmjF03.0080 | YBL011W |        |        |        | K13507 | BBM_I100565 | 5           |      | 2    | 1 | K13507 | K13507 |        |
| BBOV_IV005190 | TA19485 | PF10_0267   | LmjF24.0330 | YKL155C |        |        |        |        | BBM_I100570 | 5           |      | 0    | 0 | Valid  |        |        |
| BBOV_IV005180 | TA19495 | PF10_0268   |             | YIL010W | K03564 |        |        | K03564 | BBM_I100575 | 4           | api+ | 2    | 1 | Valid  | K03564 |        |
| BBOV_IV005170 | TA19500 | PF10_0269   | LmjF32.1280 | YDR404C | K03015 | K03015 | K03015 | K03015 | BBM_I100580 | 5           |      | 5    | 1 | K03015 | K03015 |        |
|               |         | PF10_0270   |             |         |        |        |        |        | BBM_I100585 | 1           |      | 0    | 0 | NA     |        |        |
|               | TA19505 | PF10_0412   | LmjF16.0630 | YHL022C |        | K10878 |        | K10878 | BBM_I100590 | 4           |      | 2    | 1 | NA     |        |        |
| BBOV_IV005160 | TA19510 | PF10_0271   | LmjF34.2390 | YOR257W |        |        |        |        | BBM_I100595 | 5           |      | 0    | 0 | Valid  |        |        |
| BBOV_IV005150 | TA19515 | MAL8P1.23   | LmjF07.0280 | YDR457W |        |        | K10592 | K10592 | BBM_I100600 | 5           |      | 3    | 1 | K10592 | K10592 |        |
|               |         |             |             |         |        |        |        |        | BBM_I100605 | 0           |      | 0    | 0 | NA     |        |        |
| BBOV_IV005130 | TA19525 | PFD0455w    | LmjF35.3880 | YLL011W | K11806 | K11806 | K11806 | K11806 | BBM_I100610 | 5           |      | 5    | 1 | K11806 | K11806 |        |
| BBOV_IV005120 | TA19530 |             |             |         | K13835 | K13835 |        |        | BBM_I100615 | 2           | piro | 2    | 1 | K13835 | K13835 |        |
| BBOV_IV005100 | TA19535 | PFL0665c    | LmjF28.0810 | YOR224C | K03016 | K03016 | K03016 | K03016 | BBM_I100620 | 5           |      | 5    | 1 | K03016 | K03016 |        |
| BBOV_IV005110 | TA19540 | PFL0660w    | LmjF32.0230 | YDR424C | K10418 | K10418 | K10418 | K10418 | BBM_I100625 | 5           |      | 5    | 1 | K10418 | K10418 |        |
| BBOV_IV005090 | TA19545 | PFL0625c    | LmjF17.0010 | YBR079C | K03254 | K03254 | K03254 | K03254 | BBM_I100630 | 5           |      | 4    | 1 | K03254 | K03254 |        |
| BBOV_IV005070 | TA19565 | PF14_0042   | LmjF20.0650 | YMR229C | K14792 | K14792 | K14792 | K14792 | BBM_I100635 | 5           |      | 5    | 1 | K14792 | K14792 |        |
| BBOV_IV005060 | TA19570 | PFC0865w    | LmjF26.0760 | YIR005W | K13107 | K13107 | K13107 | K13107 | BBM_I100640 | 4           |      | 4    | 1 | K13107 | K13107 |        |
| BBOV_IV005050 | TA19575 | PF13_0086   | LmjF34.0450 |         |        |        | K03469 |        | BBM_I100645 | 4           | api+ | 1    | 1 | Valid  |        |        |
| BBOV_IV005040 | TA19580 | MAL13P1.79  |             |         |        |        |        |        | BBM_I100650 | 3           | api  | 0    | 0 | Valid  |        |        |
| BBOV_IV005030 | TA19585 | MAL13P1.283 | LmjF21.1090 | YDL143W | K09496 | K09496 | K09496 | K09496 | BBM_I100655 | 5           |      | 5    | 1 | K09496 | K09496 |        |
| BBOV_IV005020 | TA19590 | PF13_0309   | LmjF36.4210 | YLR409C | K14554 | K14554 |        | K14554 | BBM_I100660 | 5           |      | 4    | 1 | K14554 | K14554 |        |
| BBOV_IV005010 | TA19595 | PFC0780w    |             |         |        |        |        |        | BBM_I100665 | 3           | api  | 0    | 0 | Valid  |        |        |
| BBOV_IV005000 | TA19600 | PFC0975c    | LmjF23.0050 | YML078W | K01802 | K01802 | K01802 | K01802 | BBM_I100670 | 5           |      | 5    | 1 | K01802 | K01802 |        |
| BBOV_IV004990 | TA19605 | PFC0980c    |             | YPL228W |        |        |        | K01098 | BBM_I100675 | 4           | api+ | 1    | 1 | Valid  |        |        |
| BBOV_IV004980 | TA19610 | PFC0960c    | LmjF27.2170 | YJR134C |        |        |        |        | BBM_I100680 | 5           |      | 0    | 0 | Valid  |        |        |
| BBOV_IV004970 | TA19620 | PFC0995c    |             | YNR019W | K00635 | K00635 | K00635 | K00637 | BBM_I100690 | 4           | api+ | 4    | 2 | K00635 | K00635 |        |
| BBOV_IV004960 | TA19625 | PF07_0095   |             | YGR024C | K10761 | K10761 | K10761 | K10761 | BBM_I100695 | 4           | api+ | 4    | 1 | K10761 | K10761 |        |
|               | TA19635 | MAL7P1.124  |             |         |        |        |        |        | BBM_I100700 | 2           |      | 0    | 0 | NA     |        |        |
| BBOV_IV004920 |         | MAL7P1.112  | LmjF35.0450 | YPR184W |        |        |        | K01196 | BBM_I100705 | 4           |      | 1    | 1 | NA     |        |        |
| BBOV_IV004860 | TA19680 |             |             |         |        |        |        |        | BBM_I100710 | 2           | piro | 0    | 0 | Valid  |        |        |
| BBOV_IV004870 | TA19675 |             | LmjF27.0840 | YBR240C |        |        |        |        | BBM_I100715 | 4           |      | 0    | 0 | NA     |        |        |
| BBOV_IV004890 | TA19650 | PF07_0094   | LmjF34.0680 |         |        |        |        |        | BBM_I100720 | 4           | api+ | 0    | 0 | Valid  |        |        |
| BBOV_IV004910 | TA19645 |             | LmjF25.0530 | YPL270W |        |        | K05657 | K02021 | BBM_I100725 | 4           |      | 2    | 2 | NA     |        |        |
| BBOV_IV004840 | TA19690 | PF13_0121   | LmjF28.2420 | YDR148C | K00658 | K00658 | K00658 | K00658 | BBM_I100730 | 5           |      | 5    | 1 | K00658 | K00658 |        |
| BBOV_IV004830 | TA19695 | PFE0570w    | LmjF29.1750 |         |        |        |        |        | BBM_I100735 | 4           | api+ | 0    | 0 | Valid  |        |        |
| BBOV_IV004820 | TA19700 | PFE0605c    | LmjF14.0910 | YOL049W | K01920 | K01920 | K01920 | K01920 | BBM_I100740 | 5           |      | 5    | 1 | K01920 | K01920 |        |
|               | TA21425 |             |             |         |        |        |        |        | BBM_I100745 | 1           |      | 0    | 0 | NA     |        |        |
| BBOV_IV004650 | TA21430 | PFE1195w    | LmjF32.2150 | YMR308C |        |        |        |        | BBM_I100750 | 5           |      | 0    | 0 | Valid  |        |        |
|               |         | MAL13P1.161 |             |         |        |        |        |        | BBM_I100755 | 1           |      | 0    | 0 | NA     |        |        |
|               |         |             |             |         |        |        |        |        | BBM_I100760 | 0           |      | 0    | 0 | NA     |        |        |
| BBOV_IV004680 | TA21435 | PFD0190w    | LmjF36.5330 |         | K11428 | K11428 | K11428 |        | BBM_I100765 | 4           | api+ | 3    | 1 | K11428 | K11428 |        |
| BBOV_IV004690 | TA21440 | PFE1110w    |             |         |        |        |        |        | BBM_I100770 | 3           | api  | 0    | 0 | Valid  |        |        |

|                                                               |
|---------------------------------------------------------------|
| kinetochore protein NDC80                                     |
|                                                               |
|                                                               |
|                                                               |
|                                                               |
|                                                               |
|                                                               |
| succinate dehydrogenase (ubiquinone) iron-sulfur protein      |
|                                                               |
|                                                               |
|                                                               |
|                                                               |
|                                                               |
| protein phosphatase [EC:3.1.3.16]                             |
|                                                               |
| glycerol-3-phosphate O-acyltransferase / dihydroxyacetone     |
|                                                               |
| peroxiredoxin Q/BCP [EC:1.11.1.15]                            |
| DNA-directed RNA polymerase II subunit G                      |
|                                                               |
|                                                               |
|                                                               |
| E3 ubiquitin-protein ligase HUWE1 [EC:6.3.2.19]               |
|                                                               |
| WDSOF1, WD repeat and SOF domain-containing protein 1         |
| cell-traversal protein for ookinetes and sporozoites          |
| DNA-directed RNA polymerase II subunit H                      |
| dynein light chain LC8-type                                   |
| translation initiation factor eIF-3 subunit 10                |
| RRP5, PDCD11, rRNA biogenesis protein RRP5                    |
| RNA-binding motif protein, X-linked 2                         |
|                                                               |
|                                                               |
| T-complex protein 1 subunit delta                             |
| UTP21, WDR36, U3 small nucleolar RNA-associated protein 21    |
|                                                               |
| peptidylprolyl isomerase [EC:5.2.1.8]                         |
|                                                               |
|                                                               |
| diacylglycerol O-acyltransferase [EC:2.3.1.20]                |
| tRNA(His) guanylyltransferase [EC:2.7.7.-]                    |
|                                                               |
|                                                               |
|                                                               |
|                                                               |
|                                                               |
|                                                               |
| 2-oxoglutarate dehydrogenase E2 component (dihydroliipoamide) |
|                                                               |
|                                                               |
| glutathione synthase [EC:6.3.2.3]                             |
|                                                               |
|                                                               |
|                                                               |
|                                                               |
| histone-lysine N-methyltransferase SETD8 [EC:2.1.1.43]        |
|                                                               |





|               |         |             |             |           |        |        |        |        |        |            |   |      |   |   |        |        |                                                                       |
|---------------|---------|-------------|-------------|-----------|--------|--------|--------|--------|--------|------------|---|------|---|---|--------|--------|-----------------------------------------------------------------------|
| BBOV_IV005410 | TA21135 | PF14_0107   | LmjF34.1110 | YLR022C   | K14574 | K14574 | K14574 | K14574 | K14574 | BBM_I01050 | 5 |      | 5 | 1 | K14574 | K14574 | SDO1, SBDS, ribosome maturation protein SDO1                          |
|               |         |             |             |           |        |        |        |        |        | BBM_I01055 | 0 |      | 0 | 0 | NA     |        |                                                                       |
|               |         |             |             |           |        |        |        |        |        | BBM_I01060 | 0 |      | 0 | 0 | NA     |        |                                                                       |
| BBOV_IV005400 |         | PFL1710c    |             |           |        |        |        |        |        | BBM_I01065 | 2 |      | 0 | 0 | NA     |        |                                                                       |
| BBOV_IV004110 | TA21145 | PFL1705w    |             | YER068W   | K10643 | K10643 |        |        | K10643 | BBM_I01070 | 4 | api+ | 3 | 1 | K10643 | K10643 | CCR4-NOT transcription complex subunit 4 [EC:6.3.2.19]                |
| BBOV_IV004120 | TA21150 | PF13_0313   | LmjF17.1410 | YGR211W   | K06874 | K06874 | K06874 | K06874 | K06874 | BBM_I01075 | 5 |      | 5 | 1 | K06874 | K06874 | zinc finger protein                                                   |
| BBOV_IV004130 |         |             |             |           |        |        |        |        |        | BBM_I01080 | 1 |      | 0 | 0 | NA     |        |                                                                       |
|               |         |             |             |           |        |        |        |        |        | BBM_I01085 | 0 |      | 0 | 0 | NA     |        |                                                                       |
| BBOV_IV004150 | TA21175 | PF13_0122   |             |           | K01802 | K01802 |        |        |        | BBM_I01090 | 3 | api  | 2 | 1 | Valid  |        |                                                                       |
| BBOV_IV004160 | TA21180 |             |             | YGL208W   |        |        |        |        |        | BBM_I01095 | 3 |      | 0 | 0 | NA     |        |                                                                       |
| BBOV_IV004170 |         | MAL13P1.288 |             |           |        |        |        |        |        | BBM_I01100 | 2 |      | 0 | 0 | NA     |        |                                                                       |
|               |         |             |             | YOR030W   |        |        |        |        |        | BBM_I01110 | 1 |      | 0 | 0 | NA     |        |                                                                       |
| BBOV_IV004190 | TA21190 | PF14_0104   | LmjF09.1070 | YER025W   | K03242 | K03242 | K03242 | K03242 | K03242 | BBM_I01115 | 5 |      | 5 | 1 | K03242 | K03242 | translation initiation factor eIF-2 gamma subunit                     |
|               |         |             |             |           |        |        |        |        |        | BBM_I01120 | 0 |      | 0 | 0 | NA     |        |                                                                       |
|               |         |             |             |           |        |        |        |        |        | BBM_I01125 | 0 |      | 0 | 0 | NA     |        |                                                                       |
|               |         |             |             |           |        |        |        |        |        | BBM_I01130 | 0 |      | 0 | 0 | NA     |        |                                                                       |
| BBOV_I001510  |         |             |             |           |        |        |        |        |        | BBM_I01135 | 1 |      | 0 | 0 | NA     |        |                                                                       |
| BBOV_IV005480 | TA21095 | PF07_0077   | LmjF21.0230 | YLR085C   |        |        |        |        | K11662 | BBM_I01140 | 5 |      | 1 | 1 | K11662 | K11662 | actin-related protein 6                                               |
| BBOV_IV005500 | TA21090 | PF11_0274   | LmjF29.1000 |           |        |        |        |        |        | BBM_I01145 | 4 | api+ | 0 | 0 | Valid  |        |                                                                       |
| BBOV_IV005510 | TA21085 | PF11_0275   | LmjF28.0470 | YPL126W   | K14552 |        |        | K14552 | K14552 | BBM_I01150 | 5 |      | 3 | 1 | K14552 | K14552 | NAN1, UTP17, WDR75, NET1-associated nuclear protein 1 (U3 small       |
| BBOV_IV005520 | TA21080 | PF11_0147   | LmjF33.1380 | YBL016W   | K08293 | K08293 | K08293 | K04371 | K04371 | BBM_I01155 | 5 |      | 5 | 2 | K08293 | K08293 | mitogen-activated protein kinase [EC:2.7.11.24]                       |
| BBOV_IV005540 | TA21075 | PF11_0152   |             | YGR100W   |        |        |        |        |        | BBM_I01160 | 4 | api+ | 0 | 0 | Valid  | Valid  | TBC domain containing protein                                         |
|               |         | PF11_0153   |             |           |        |        |        |        |        | BBM_I01165 | 1 |      | 0 | 0 | NA     |        |                                                                       |
| BBOV_IV005570 | TA21055 | PF14_0261   | LmjF19.0160 |           |        | K14813 | K01265 |        |        | BBM_I01170 | 4 | api+ | 2 | 2 | Valid  |        |                                                                       |
| BBOV_IV005590 | TA05020 | PF14_0308   | LmjF35.3450 | YER162C   |        |        |        | K10838 | K10838 | BBM_I01175 | 5 |      | 2 | 1 | K10838 | K10838 | xeroderma pigmentosum group C-complementing protein                   |
| BBOV_IV005600 | TA21040 | PF14_0307   |             | YGR283C   | K09142 | K09142 | K09142 |        | K09142 | BBM_I01180 | 4 | api+ | 4 | 1 | K09142 | K09142 | hypothetical protein                                                  |
| BBOV_IV005700 | TA21030 | PFB0645c    | LmjF34.3680 | YOR150W   | K02871 | K02871 | K02871 | K02871 | K02871 | BBM_I01185 | 5 |      | 5 | 1 | K02871 | K02871 | large subunit ribosomal protein L13                                   |
| BBOV_IV005710 | TA21025 | PFB0655c    | LmjF29.1380 |           | K14798 | K14798 | K14798 |        |        | BBM_I01190 | 4 | api+ | 3 | 1 | K14798 | K14798 | LTV1, protein LTV1                                                    |
|               |         |             |             |           |        |        |        |        |        | BBM_I01195 | 0 |      | 0 | 0 | NA     |        |                                                                       |
| BBOV_IV005730 | TA21015 | PFD0250c    |             |           |        |        |        |        |        | BBM_I01200 | 3 | api  | 0 | 0 | Valid  |        |                                                                       |
| BBOV_IV005740 | TA21010 |             |             |           |        | K14807 |        |        |        | BBM_I01205 | 2 | piro | 1 | 1 | Valid  |        |                                                                       |
| BBOV_IV005760 | TA21000 | PF11_0280   | LmjF35.4460 | YPR182W   | K11098 | K11098 |        |        | K11098 | BBM_I01210 | 5 |      | 4 | 1 | K11098 | K11098 | small nuclear ribonucleoprotein F                                     |
|               | TA20995 | PF11_0284   | LmjF35.5230 | YDL201W   |        | K03439 | K03439 | K03439 | K03439 | BBM_I01215 | 4 |      | 4 | 1 | K03439 | K03439 | tRNA (guanine-N7-)-methyltransferase [EC:2.1.1.33]                    |
| BBOV_IV005770 | TA20975 | PF11_0282   |             | YBR252W   | K01520 | K01520 |        |        | K01520 | BBM_I01220 | 4 | api+ | 4 | 1 | K01520 | K01520 | dUTP pyrophosphatase [EC:3.6.1.23]                                    |
| BBOV_IV005780 | TA20970 |             |             |           |        |        |        |        |        | BBM_I01225 | 2 | piro | 0 | 0 | Valid  |        |                                                                       |
| BBOV_IV005790 | TA20965 | PF14_0110   |             | YLR176C   |        |        |        |        | K09175 | BBM_I01230 | 4 | api+ | 1 | 1 | Valid  |        |                                                                       |
| BBOV_IV005810 | TA20960 | PF14_0112   | LmjF34.1260 | YOR001W   | K02335 | K02335 | K02335 | K02335 | K12591 | BBM_I01235 | 5 |      | 5 | 1 | K02335 | K02335 | DNA polymerase I [EC:2.7.7.7]                                         |
| BBOV_IV005820 | TA20955 |             | LmjF30.1150 | YLR336C   |        |        |        |        |        | BBM_I01240 | 4 |      | 0 | 0 | NA     |        |                                                                       |
| BBOV_IV005830 | TA20945 | PFL1725w    | LmjF25.1180 | YJR121W   | K02133 | K02133 | K02133 | K02133 | K02133 | BBM_I01245 | 5 |      | 5 | 1 | K02133 | K02133 | F-type H <sup>+</sup> -transporting ATPase subunit beta [EC:3.6.3.14] |
| BBOV_IV005840 | TA20940 | PFL1720w    | LmjF28.2370 | YBR263W   | K00600 | K00600 | K00600 | K00600 | K00600 | BBM_I01250 | 5 |      | 5 | 1 | K00600 | K00600 | glycine hydroxymethyltransferase [EC:2.1.2.1]                         |
| BBOV_IV005850 |         | PFL1715w    | LmjF20.0700 | YCL055W   |        |        |        |        |        | BBM_I01255 | 4 |      | 0 | 0 | NA     |        |                                                                       |
| BBOV_IV005860 | TA20935 | PFI0285w    |             |           |        |        |        |        |        | BBM_I01260 | 3 | api  | 0 | 0 | Valid  |        |                                                                       |
|               |         |             |             |           |        |        |        |        |        | BBM_I01265 | 0 |      | 0 | 0 | NA     |        |                                                                       |
| BBOV_IV005880 |         | PFI0375w    | LmjF30.1420 |           |        |        |        |        |        | BBM_I01270 | 3 |      | 0 | 0 | NA     |        |                                                                       |
| BBOV_IV005890 | TA20925 | PFI0290c    | LmjF33.3210 | YGL137W   |        |        |        |        |        | BBM_I01275 | 5 |      | 0 | 0 | Valid  |        |                                                                       |
| BBOV_IV005900 | TA20920 | PFI0300w    | LmjF33.1900 | YKR035W-A | K12197 | K12197 | K12197 | K12197 | K12197 | BBM_I01285 | 5 |      | 5 | 1 | K12197 | K12197 | charged multivesicular body protein 1                                 |
| BBOV_IV005910 | TA20915 |             |             |           |        |        |        |        |        | BBM_I01290 | 2 | piro | 0 | 0 | Valid  |        |                                                                       |
| BBOV_IV005920 |         | PFD0940w    |             | YER019W   |        |        |        |        | K01128 | BBM_I01295 | 3 |      | 1 | 1 | NA     |        |                                                                       |
| BBOV_IV005930 | TA20910 | MAL13P1.56  | LmjF26.0300 | YKL157W   | K01256 | K01269 | K13725 | K01269 | K13721 | BBM_I01305 | 5 |      | 5 | 4 | NA     |        |                                                                       |
|               |         |             |             |           |        |        |        |        |        | BBM_I01310 | 0 |      | 0 | 0 | NA     |        |                                                                       |
| BBOV_IV005940 | TA20905 | PF14_0256   | LmjF36.3020 | YGR195W   | K11600 | K11600 | K11600 | K11600 | K11600 | BBM_I01315 | 5 |      | 5 | 1 | K11600 | K11600 | exosome complex component RRP41                                       |
| BBOV_IV005960 | TA20900 | PF14_0257   | LmjF30.3640 |           |        |        |        |        |        | BBM_I01320 | 4 | api+ | 0 | 0 | Valid  |        |                                                                       |
| BBOV_IV005970 | TA20895 |             | LmjF31.2670 |           |        |        |        |        |        | BBM_I01325 | 3 |      | 0 | 0 | NA     |        |                                                                       |
| BBOV_IV005980 | TA20890 | PF13_0134   |             |           |        |        |        |        |        | BBM_I01330 | 3 | api  | 0 | 0 | Valid  |        |                                                                       |

|               |         |             |             |            |        |        |        |        |        |  |             |   |      |   |   |        |        |                                                         |
|---------------|---------|-------------|-------------|------------|--------|--------|--------|--------|--------|--|-------------|---|------|---|---|--------|--------|---------------------------------------------------------|
| BBOV_IV005990 |         | MAL13P1.53  | LmjF33.1355 | YER048W-A  |        |        |        |        |        |  | BBM_IJ01335 | 4 |      | 0 | 0 | NA     |        |                                                         |
| BBOV_IV006000 | TA20885 |             |             |            |        |        |        |        |        |  | BBM_IJ01340 | 2 | piro | 0 | 0 | Valid  |        |                                                         |
|               |         |             |             |            |        |        |        |        |        |  | BBM_IJ01345 | 0 |      | 0 | 0 | NA     |        |                                                         |
| BBOV_IV006010 |         |             | LmjF32.2360 | YNR040W    |        |        |        |        |        |  | BBM_IJ01350 | 3 |      | 0 | 0 | NA     |        |                                                         |
| BBOV_IV006040 | TA20865 |             | LmjF23.0690 |            |        |        |        | K00632 |        |  | BBM_IJ01355 | 3 |      | 1 | 1 | NA     |        |                                                         |
| BBOV_IV006050 | TA20860 | MAL13P1.128 |             |            |        |        |        |        |        |  | BBM_IJ01360 | 3 | api  | 0 | 0 | Valid  |        |                                                         |
|               |         |             |             |            |        |        |        |        |        |  | BBM_IJ01365 | 0 |      | 0 | 0 | NA     |        |                                                         |
| BBOV_IV006060 | TA20855 | MAL13P1.129 | LmjF05.0060 |            |        |        |        |        |        |  | BBM_IJ01370 | 4 | api+ | 0 | 0 | Valid  |        |                                                         |
| BBOV_IV006070 | TA20850 | PF13_0129   | LmjF21.1050 | YGL147C    | K02940 | K02940 | K02940 | K02940 | K02940 |  | BBM_IJ01375 | 5 |      | 5 | 1 | K02940 | K02940 | large subunit ribosomal protein L9e                     |
| BBOV_IV006080 | TA20845 | PF13_0059   |             | YDR337W    |        |        |        |        |        |  | BBM_IJ01380 | 4 | api+ | 0 | 0 | Valid  |        |                                                         |
| BBOV_IV006090 | TA20840 | MAL13P1.52  | LmjF17.1240 | YNL313C    |        |        |        |        |        |  | BBM_IJ01385 | 5 |      | 0 | 0 | Valid  |        |                                                         |
| BBOV_IV006100 |         | PF13_0058   |             | YER044C    |        |        |        |        |        |  | BBM_IJ01390 | 3 |      | 0 | 0 | NA     |        |                                                         |
| BBOV_IV006110 | TA20835 | PF13_0056   | LmjF26.1140 |            |        |        |        |        |        |  | BBM_IJ01395 | 4 | api+ | 0 | 0 | Valid  |        |                                                         |
|               |         | PF14_0317   | LmjF25.2320 | YJR1010C-A |        |        |        |        | K12946 |  | BBM_IJ01400 | 3 |      | 1 | 1 | NA     |        |                                                         |
|               |         |             |             |            |        |        |        |        |        |  | BBM_IJ01402 |   |      |   |   | Valid  |        | tRNA, Thr, anticodon AGT                                |
|               |         |             |             |            |        |        |        |        |        |  | BBM_IJ01405 | 0 |      | 0 | 0 | NA     |        |                                                         |
| BBOV_IV006160 | TA20820 | PF14_0265   |             |            | K02835 | K02835 | K02835 |        |        |  | BBM_IJ01410 | 3 | api  | 3 | 1 | K02835 | K02835 | peptide chain release factor RF-1                       |
| BBOV_IV006170 | TA20815 | PF14_0267   |             |            |        |        |        |        |        |  | BBM_IJ01415 | 3 | api  | 0 | 0 | Valid  |        |                                                         |
| BBOV_IV006180 | TA20810 |             | LmjF15.1250 |            | K12165 | K12165 |        | K12165 |        |  | BBM_IJ01420 | 3 |      | 3 | 1 | K12165 | K12165 | ufm1-conjugating enzyme 1                               |
| BBOV_IV006190 |         | PFD0325w    |             |            |        |        |        |        |        |  | BBM_IJ01425 | 2 |      | 0 | 0 | NA     |        |                                                         |
| BBOV_IV006200 | TA20800 | PFL1130c    |             |            |        |        |        |        |        |  | BBM_IJ01430 | 3 | api  | 0 | 0 | Valid  |        |                                                         |
| BBOV_IV006210 | TA20795 | MAL13P1.352 |             | YNR067C    |        |        |        |        |        |  | BBM_IJ01435 | 4 | api+ | 0 | 0 | Valid  |        |                                                         |
| BBOV_IV006220 | TA20790 |             | LmjF28.1280 |            |        |        |        | K00500 |        |  | BBM_IJ01440 | 3 |      | 1 | 1 | NA     |        |                                                         |
| BBOV_IV006230 |         | PF13_0362   | LmjF32.0170 | YPL213W    | K11092 |        |        |        | K11092 |  | BBM_IJ01445 | 4 |      | 2 | 1 | NA     |        |                                                         |
|               |         |             |             |            |        |        |        |        |        |  | BBM_IJ01447 |   |      |   |   | Valid  |        | tRNA, Trp, anticodon CCA                                |
| BBOV_IV006260 |         |             |             |            |        |        |        |        |        |  | BBM_IJ01450 | 1 |      | 0 | 0 | NA     |        |                                                         |
|               |         | PFL0415w    |             | YKL192C    |        |        |        |        | K03955 |  | BBM_IJ01455 | 2 |      | 1 | 1 | NA     |        |                                                         |
| BBOV_IV006270 | TA20780 | PFL0520c    | LmjF21.1100 | YBR123C    |        |        |        |        |        |  | BBM_IJ01460 | 5 |      | 0 | 0 | Valid  |        |                                                         |
|               | TA20782 | PFL0410w    | LmjF27.0020 | YPL033C    |        |        |        |        |        |  | BBM_IJ01465 | 4 |      | 0 | 0 | NA     |        |                                                         |
|               |         | PF14_0102   |             |            |        |        |        |        |        |  | BBM_IJ01470 | 1 |      | 0 | 0 | NA     |        |                                                         |
| BBOV_IV006280 | TA20770 | PFL0405w    |             |            |        | K14772 | K14772 |        |        |  | BBM_IJ01475 | 3 | api  | 2 | 1 | Valid  |        |                                                         |
| BBOV_IV006290 |         |             |             |            |        |        |        |        |        |  | BBM_IJ01480 | 1 |      | 0 | 0 | NA     |        |                                                         |
|               | TA19960 | PFL2255w    |             |            |        |        |        | K10295 |        |  | BBM_IJ01485 | 2 |      | 1 | 1 | NA     |        |                                                         |
| BBOV_IV006310 | TA20755 | PFL0385c    | LmjF25.1950 |            |        |        |        |        |        |  | BBM_IJ01490 | 4 | api+ | 0 | 0 | Valid  |        |                                                         |
| BBOV_IV006320 | TA20750 | PFL0380c    |             | YOR274W    | K00791 | K00791 | K00791 |        | K00791 |  | BBM_IJ01495 | 4 | api+ | 4 | 1 | K00791 | K00791 | tRNA dimethylallyltransferase [EC:2.5.1.75]             |
| BBOV_IV006340 | TA20745 | PFL0375w    |             |            |        |        |        |        |        |  | BBM_IJ01500 | 3 | api  | 0 | 0 | Valid  |        |                                                         |
| BBOV_IJ000820 | TA18195 | PFL0370w    |             |            |        |        |        |        |        |  | BBM_IJ01505 | 3 | api  | 0 | 0 | Valid  |        |                                                         |
|               |         |             |             |            |        |        |        |        |        |  | BBM_IJ01510 | 0 |      | 0 | 0 | NA     |        |                                                         |
| BBOV_IJ000850 | TA18205 | PFL0355c    | LmjF36.6520 | YDR365C    |        |        |        |        |        |  | BBM_IJ01515 | 5 |      | 0 | 0 | Valid  |        |                                                         |
| BBOV_IJ000870 | TA17975 | PF14_0458   |             |            |        |        |        |        |        |  | BBM_IJ01520 | 3 | api  | 0 | 0 | Valid  |        |                                                         |
| BBOV_IJ000880 | TA17970 | PFC0285c    | LmjF27.1260 | YIL142W    | K09494 | K09494 | K09494 | K09494 | K09494 |  | BBM_IJ01525 | 5 |      | 5 | 1 | K09494 | K09494 | T-complex protein 1 subunit beta                        |
|               | TA17965 | PF11_0182   |             | YOL114C    |        |        |        |        |        |  | BBM_IJ01530 | 3 |      | 0 | 0 | NA     |        |                                                         |
|               | TA17960 |             |             |            |        |        |        |        |        |  | BBM_IJ01535 | 1 |      | 0 | 0 | NA     |        |                                                         |
| BBOV_IJ000900 | TA17955 |             |             |            |        |        |        |        |        |  | BBM_IJ01540 | 2 | piro | 0 | 0 | Valid  |        |                                                         |
|               |         |             |             |            |        |        |        |        |        |  | BBM_IJ01545 | 0 |      | 0 | 0 | NA     |        |                                                         |
| BBOV_IJ000910 | TA17935 | PF11_0207   |             |            |        |        |        |        |        |  | BBM_IJ01550 | 3 | api  | 0 | 0 | Valid  |        |                                                         |
|               |         |             |             | YDR432W    |        |        |        |        |        |  | BBM_IJ01555 | 1 |      | 0 | 0 | NA     |        |                                                         |
| BBOV_IJ000930 | TA17925 | PFC0275w    | LmjF28.0240 | YIL155C    | K00111 | K00111 | K00111 | K00111 | K00111 |  | BBM_IJ01560 | 5 |      | 5 | 1 | K00111 | K00111 | glycerol-3-phosphate dehydrogenase [EC:1.1.5.3]         |
| BBOV_IJ000940 | TA17920 | PFC0280c    |             |            |        |        |        |        |        |  | BBM_IJ01565 | 3 | api  | 0 | 0 | Valid  |        |                                                         |
| BBOV_IJ000950 | TA18045 | PF14_0370   | LmjF13.0500 | YER172C    | K12854 | K12854 | K01509 | K01529 | K12854 |  | BBM_IJ01570 | 5 |      | 5 | 3 | NA     | Valid  | BMN1-5B                                                 |
| BBOV_IJ000960 | TA18040 | PFL0330c    | LmjF20.0010 | YOR207C    | K03021 | K03021 | K03021 | K03021 | K03021 |  | BBM_IJ01575 | 5 |      | 5 | 1 | K03021 | K03021 | DNA-directed RNA polymerase III subunit C2 [EC:2.7.7.6] |
| BBOV_IJ000970 | TA18035 | PFC0290w    | LmjF21.1070 | YPR132W    | K02973 | K02973 | K02973 | K02973 | K02973 |  | BBM_IJ01585 | 5 |      | 5 | 1 | K02973 | K02973 | small subunit ribosomal protein S23e                    |
|               |         |             |             |            |        |        |        |        |        |  | BBM_IJ01590 | 0 |      | 0 | 0 | NA     |        |                                                         |
| BBOV_IJ001000 | TA18020 | PFI0705w    | LmjF21.1840 |            |        |        |        |        |        |  | BBM_IJ01595 | 4 | api+ | 0 | 0 | Valid  |        |                                                         |

|                |         |             |             |           |        |        |        |        |        |             |   |      |   |   |        |        |  |                                                                      |
|----------------|---------|-------------|-------------|-----------|--------|--------|--------|--------|--------|-------------|---|------|---|---|--------|--------|--|----------------------------------------------------------------------|
| BBOV_III001260 | TA17855 | PFL2055w    | LmjF16.0310 | YHR070W   | K07055 | K07055 | K02962 |        | K07055 | BBM_II01600 | 5 |      | 4 | 2 | NA     |        |  |                                                                      |
| BBOV_III002550 | TA17870 | PFL2050w    |             | YKL019W   | K05955 | K05955 |        |        | K05955 | BBM_II01605 | 4 | api+ | 3 | 1 | K05955 | K05955 |  | protein farnesyltransferase/geranylgeranyltransferase type-1 subunit |
| BBOV_III001130 | TA17875 | PFL2045w    |             |           |        |        |        |        |        | BBM_II01610 | 3 | api  | 0 | 0 | Valid  |        |  |                                                                      |
|                | TA17880 | PFL1215c    |             | YJL176C   |        |        |        |        | K11772 | BBM_II01615 | 3 |      | 1 | 1 | NA     |        |  |                                                                      |
|                |         |             | LmjF11.0570 |           |        |        |        |        |        | BBM_II01620 | 1 |      | 0 | 0 | NA     |        |  |                                                                      |
| BBOV_III001120 | TA17890 | PFL2060c    | LmjF29.2160 | YER136W   |        |        |        |        |        | BBM_II01625 | 5 |      | 0 | 0 | Valid  |        |  |                                                                      |
| BBOV_III001110 | TA17895 | PFD1055w    | LmjF29.2860 | YNL302C   | K02966 | K02966 | K02966 | K02966 | K02966 | BBM_II01630 | 5 |      | 5 | 1 | K02966 | K02966 |  | small subunit ribosomal protein S19e                                 |
| BBOV_III001100 | TA17900 | PFC0295c    | LmjF13.0570 | YOR369C   | K02951 | K02951 | K02951 | K02951 | K02951 | BBM_II01635 | 5 |      | 5 | 1 | K02951 | K02951 |  | small subunit ribosomal protein S12e                                 |
| BBOV_III001090 | TA17905 | PFL0335c    | LmjF34.0350 | YPR041W   | K03262 | K03262 | K03262 | K03262 | K03262 | BBM_II01640 | 5 |      | 5 | 1 | K03262 | K03262 |  | translation initiation factor eIF-5                                  |
|                |         | MAL13P1.50  | LmjF35.3150 |           |        |        |        |        |        | BBM_II01645 | 2 |      | 0 | 0 | NA     |        |  |                                                                      |
| BBOV_III001080 | TA17910 | PFL0450c    | LmjF27.2335 |           |        | K14294 |        |        |        | BBM_II01650 | 4 | api+ | 1 | 1 | Valid  |        |  |                                                                      |
| BBOV_III001070 | TA17980 | PFL0460w    | LmjF26.0005 | YNL147W   | K12626 | K12626 | K12626 | K12626 | K12626 | BBM_II01655 | 5 |      | 5 | 1 | K12626 | K12626 |  | U6 snRNA-associated Sm-like protein LSm7                             |
| BBOV_III001060 | TA17985 | PFL0465c    |             | YPR186C   |        |        |        |        |        | BBM_II01665 | 4 | api+ | 0 | 0 | Valid  |        |  |                                                                      |
| BBOV_III001050 | TA17990 | PF14_0671   | LmjF10.0110 | YDR267C   |        |        |        |        |        | BBM_II01670 | 5 |      | 0 | 0 | Valid  |        |  |                                                                      |
| BBOV_III001030 | TA17995 | PFL2130w    |             |           |        |        |        |        |        | BBM_II01675 | 3 | api  | 0 | 0 | Valid  |        |  |                                                                      |
| BBOV_III001010 | TA18015 | PF08_0101   |             |           |        |        |        |        |        | BBM_II01680 | 3 | api  | 0 | 0 | Valid  |        |  |                                                                      |
|                | TA17850 |             | LmjF23.0790 |           |        |        |        | K11426 |        | BBM_II01685 | 2 |      | 1 | 1 | NA     |        |  |                                                                      |
| BBOV_III001370 | TA17840 | PFB0175c    | LmjF22.1380 | YAL025C   | K14831 | K14831 | K14831 | K14831 | K14831 | BBM_II01690 | 5 |      | 5 | 1 | K14831 | K14831 |  | MAK16, protein MAK16                                                 |
| BBOV_III001380 | TA17835 | MAL7P1.209  |             |           |        |        |        |        |        | BBM_II01695 | 3 | api  | 0 | 0 | Valid  |        |  |                                                                      |
| BBOV_III001390 | TA17830 |             |             |           |        |        |        |        |        | BBM_II01700 | 2 | piro | 0 | 0 | Valid  |        |  |                                                                      |
|                |         |             |             |           |        |        |        |        |        | BBM_II01705 | 0 |      | 0 | 0 | NA     |        |  |                                                                      |
|                |         |             |             |           |        |        |        |        |        | BBM_II01710 | 0 |      | 0 | 0 | NA     |        |  |                                                                      |
|                |         |             |             | YJR112W-A |        |        |        |        |        | BBM_II01715 | 1 |      | 0 | 0 | NA     |        |  |                                                                      |
| BBOV_III001500 | TA17805 | MAL13P1.164 | LmjF18.0740 | YOR187W   | K02358 | K02358 |        | K02358 | K02358 | BBM_II01720 | 5 |      | 4 | 1 | K02358 | K02358 |  | elongation factor EF-Tu [EC:3.6.5.3]                                 |
|                |         |             |             |           |        |        |        |        |        | BBM_II01725 | 0 |      | 0 | 0 | NA     |        |  |                                                                      |
| BBOV_III001480 | TA17795 | PFC1020c    | LmjF35.0420 | YML063W   | K02984 | K02984 | K02984 | K02984 | K02984 | BBM_II01730 | 5 |      | 5 | 1 | K02984 | K02984 |  | small subunit ribosomal protein S3Ae                                 |
| BBOV_III001470 | TA17790 |             |             |           |        |        |        |        |        | BBM_II01735 | 2 | piro | 0 | 0 | Valid  |        |  |                                                                      |
| BBOV_I003350   | TA03230 | PF10_0287   | LmjF32.0510 | YNL323W   |        |        |        |        |        | BBM_II01740 | 5 |      | 0 | 0 | Valid  |        |  |                                                                      |
| BBOV_I003340   | TA03225 | PF11_0331   | LmjF32.3270 | YDR212W   | K09493 | K09493 | K09493 | K09493 | K09493 | BBM_II01750 | 5 |      | 5 | 1 | K09493 | K09493 |  | T-complex protein 1 subunit alpha                                    |
| BBOV_I003320   | TA05520 | PF10_0215a  | LmjF15.0730 | YIL110W   |        |        |        |        |        | BBM_II01755 | 5 |      | 0 | 0 | Valid  |        |  |                                                                      |
|                |         |             |             |           |        |        |        |        |        | BBM_II01760 | 0 |      | 0 | 0 | NA     |        |  |                                                                      |
| BBOV_I003310   | TA05515 | PF10_0213   | LmjF35.2670 | YGR232W   |        |        |        | K06694 |        | BBM_II01770 | 5 |      | 1 | 1 | K06694 | K06694 |  | 26S proteasome non-ATPase regulatory subunit 10                      |
| BBOV_I003300   | TA05510 | PFI0605c    | LmjF18.1030 |           | K01113 | K01113 | K01113 | K01113 |        | BBM_II01775 | 4 | api+ | 4 | 1 | K01113 | K01113 |  | alkaline phosphatase D [EC:3.1.3.1]                                  |
| BBOV_I003240   | TA05480 | PFC0825c    |             |           | K13148 | K13148 | K13148 |        |        | BBM_II01780 | 3 | api  | 3 | 1 | K13148 | K13148 |  | integrator complex subunit 11 [EC:3.1.27.-]                          |
| BBOV_I003250   | TA05485 | PFA_0275c   | LmjF36.6660 |           | K14590 | K14590 |        | K14589 |        | BBM_II01785 | 4 | api+ | 3 | 2 | Valid  |        |  |                                                                      |
| BBOV_I003260   | TA05490 | PFA_0270c   |             |           |        |        |        |        |        | BBM_II01790 | 3 | api  | 0 | 0 | Valid  |        |  |                                                                      |
|                |         |             |             |           |        |        |        |        |        | BBM_II01795 | 0 |      | 0 | 0 | NA     |        |  |                                                                      |
| BBOV_I003280   | TA05500 | PFA_0260c   | LmjF36.5590 | YNL138W   |        |        |        |        |        | BBM_II01800 | 5 |      | 0 | 0 | Valid  |        |  |                                                                      |
|                | TA05505 | PFI0610w    | LmjF27.0930 | YER063W   |        |        |        | K00253 |        | BBM_II01805 | 4 |      | 1 | 1 | NA     |        |  |                                                                      |
|                |         |             |             | YFL062W   |        |        |        |        |        | BBM_II01810 | 1 |      | 0 | 0 | NA     |        |  |                                                                      |
| BBOV_I003230   | TA05475 |             |             |           |        |        |        |        |        | BBM_II01815 | 2 | piro | 0 | 0 | Valid  |        |  |                                                                      |
|                |         |             | LmjF32.1540 |           |        |        |        |        |        | BBM_II01820 | 1 |      | 0 | 0 | NA     |        |  |                                                                      |
| BBOV_I003210   | TA05465 |             |             | YBR250W   | K14314 |        |        |        |        | BBM_II01825 | 3 |      | 1 | 1 | NA     |        |  |                                                                      |
|                |         |             |             |           |        |        |        |        |        | BBM_II01830 | 0 |      | 0 | 0 | NA     |        |  |                                                                      |
|                |         |             |             |           |        |        |        |        |        | BBM_II01835 | 0 |      | 0 | 0 | NA     |        |  |                                                                      |
|                |         |             |             |           |        |        |        |        |        | BBM_II01840 | 0 |      | 0 | 0 | NA     |        |  |                                                                      |
| BBOV_I003200   |         | MAL13P1.77  |             |           |        |        |        |        |        | BBM_II01845 | 2 |      | 0 | 0 | NA     |        |  |                                                                      |
| BBOV_I003190   | TA05460 | PF0780w     |             |           |        |        |        |        |        | BBM_II01850 | 3 | api  | 0 | 0 | Valid  |        |  |                                                                      |
| BBOV_I003180   | TA05455 | PFA_0590w   |             |           |        |        |        |        |        | BBM_II01855 | 3 | api  | 0 | 0 | Valid  | Valid  |  | orthologous to PfMRP, ABC transporter protein involved in            |
| BBOV_I003170   | TA05450 | PF0685c     | LmjF05.0230 | YNL240C   |        |        |        |        |        | BBM_II01860 | 5 |      | 0 | 0 | Valid  |        |  |                                                                      |
|                |         |             |             |           |        |        |        |        |        | BBM_II01865 | 0 |      | 0 | 0 | NA     |        |  |                                                                      |
| BBOV_I003160   | TA05445 | PF0700c     | LmjF06.0410 | YBR084C-A | K02885 | K02885 |        | K02885 | K02885 | BBM_II01870 | 5 |      | 4 | 1 | K02885 | K02885 |  | large subunit ribosomal protein L19e                                 |
| BBOV_I003140   | TA05440 | PF0715c     | LmjF09.0050 | YOL043C   | K10773 | K10773 | K10773 | K10773 | K10773 | BBM_II01875 | 5 |      | 5 | 1 | K10773 | K10773 |  | endonuclease III [EC:4.2.99.18]                                      |
| BBOV_I001750   | TA05425 |             | LmjF17.0990 |           |        |        |        |        |        | BBM_II01880 | 3 |      | 0 | 0 | NA     |        |  |                                                                      |

|               |         |           |             |         |        |        |        |        |        |            |   |      |   |   |        |        |                                                        |
|---------------|---------|-----------|-------------|---------|--------|--------|--------|--------|--------|------------|---|------|---|---|--------|--------|--------------------------------------------------------|
|               | TA05435 | PFF0710w  |             |         |        |        |        |        |        | BBM_I01885 | 2 |      | 0 | 0 | NA     |        |                                                        |
|               |         |           |             |         |        |        |        |        |        | BBM_I01890 | 0 |      | 0 | 0 | NA     |        |                                                        |
| BBOV_I001740  | TA05430 | PFE1050w  | LmjF36.3910 | YER043C | K01251 | K01251 | K01251 | K01251 | K01251 | BBM_I01895 | 5 |      | 5 | 1 | K01251 | K01251 | adenosylhomocysteinase [EC:3.3.1.1]                    |
| BBOV_I001770  | TA05420 |           |             |         |        |        |        |        |        | BBM_I01900 | 2 | piro | 0 | 0 | Valid  |        |                                                        |
| BBOV_I001780  | TA05415 | PFF0740c  |             | YJL091C |        |        |        |        | K05283 | BBM_I01905 | 4 | api+ | 1 | 1 | Valid  |        |                                                        |
|               |         |           |             |         |        |        |        |        |        | BBM_I01906 | 0 |      | 0 | 0 | NA     |        |                                                        |
| BBOV_I001830  | TA05410 | PFF0880c  |             |         |        | K01529 |        |        |        | BBM_I01910 | 3 | api  | 1 | 1 | Valid  |        |                                                        |
| BBOV_I001840  | TA05405 |           |             | YJL011C |        |        |        |        |        | BBM_I01915 | 3 |      | 0 | 0 | NA     |        |                                                        |
| BBOV_I001850  | TA05400 |           | LmjF35.3570 |         |        |        |        |        |        | BBM_I01920 | 3 |      | 0 | 0 | NA     |        |                                                        |
|               |         |           |             |         |        |        |        |        |        | BBM_I01925 | 0 |      | 0 | 0 | NA     |        |                                                        |
|               |         |           | LmjF29.1740 |         |        |        |        | K11251 |        | BBM_I01930 | 1 |      | 1 | 1 | NA     |        |                                                        |
| BBOV_I001820  | TA05385 | PFF0840w  |             |         |        |        |        |        |        | BBM_I01935 | 3 | api  | 0 | 0 | Valid  |        |                                                        |
|               |         |           |             |         |        |        |        |        |        | BBM_I01940 | 0 |      | 0 | 0 | NA     |        |                                                        |
| BBOV_I001870  | TA05370 | PFF0835w  |             | YEL061C |        |        |        |        |        | BBM_I01945 | 4 | api+ | 0 | 0 | Valid  |        |                                                        |
| BBOV_I001880  | TA05365 | PFF0830w  | LmjF07.0050 | YBL037W | K11824 | K11824 |        | K11824 | K11824 | BBM_I01950 | 5 |      | 4 | 1 | K11824 | K11824 | AP-2 complex subunit alpha                             |
| BBOV_I001900  | TA05360 | PFF0545c  |             | YAL030W |        | K08515 |        |        | K08513 | BBM_I01955 | 4 | api+ | 2 | 2 | Valid  |        |                                                        |
| BBOV_I001910  | TA05355 | PF13_0273 | LmjF29.2090 |         | K12874 | K12874 | K12874 |        |        | BBM_I01960 | 4 | api+ | 3 | 1 | K12874 | K12874 | intron-binding protein aquarius                        |
|               |         |           | L2743.08    | YLR059C |        |        |        |        | K13288 | BBM_I01965 | 2 |      | 1 | 1 | NA     |        |                                                        |
| BBOV_I001930  | TA05345 | PFD0725c  | LmjF11.0700 | YDL100C | K01551 | K01551 | K01551 | K01551 | K01551 | BBM_I01970 | 5 |      | 5 | 1 | K01551 | K01551 | arsenite-transporting ATPase [EC:3.6.3.16]             |
| BBOV_I001940  | TA05340 | PFD0720w  |             |         |        |        |        |        |        | BBM_I01975 | 3 | api  | 0 | 0 | Valid  |        |                                                        |
| BBOV_I001950  | TA05335 | PFD0740w  |             |         |        |        |        |        |        | BBM_I01980 | 3 | api  | 0 | 0 | Valid  |        |                                                        |
|               |         |           | LmjF27.1950 |         |        |        |        |        |        | BBM_I01985 | 0 |      | 0 | 0 | NA     |        |                                                        |
| BBOV_I001960  | TA05330 |           |             |         |        |        |        |        |        | BBM_I01990 | 1 |      | 0 | 0 | NA     |        |                                                        |
| BBOV_I001970  | TA05325 | PF10_0340 | LmjF21.0810 | YGR171C | K01874 | K01874 | K01874 | K01874 | K01874 | BBM_I01995 | 2 | piro | 0 | 0 | Valid  |        |                                                        |
|               |         |           |             |         |        |        |        |        |        | BBM_I02000 | 5 |      | 5 | 1 | K01874 | K01874 | methionyl-tRNA synthetase [EC:6.1.1.10]                |
|               |         |           |             |         |        |        |        |        |        | BBM_I02002 |   |      |   |   | Valid  |        | tRNA, Gly, anticodon TTG                               |
|               |         | PFL2020c  |             |         |        |        |        |        |        | BBM_I02005 | 1 |      | 0 | 0 | NA     |        |                                                        |
| BBOV_I002000  | TA05310 | PF14_0400 |             |         | K03978 | K03978 | K03978 |        |        | BBM_I02010 | 3 | api  | 3 | 1 | K03978 | K03978 | GTP-binding protein                                    |
| BBOV_I002010  | TA05305 | PF10_0029 |             |         |        |        |        |        |        | BBM_I02015 | 3 | api  | 0 | 0 | Valid  |        |                                                        |
|               |         |           |             |         |        |        |        |        |        | BBM_I02017 |   |      |   |   | Valid  |        | tRNA, Gly, anticodon CTG                               |
| BBOV_I002030  | TA05300 | PF11_0287 |             | YNL264C |        |        |        |        |        | BBM_I02020 | 4 | api+ | 0 | 0 | Valid  |        |                                                        |
|               |         |           |             | YIL126W |        |        |        |        | K11786 | BBM_I02025 | 2 |      | 1 | 1 | NA     |        |                                                        |
|               |         |           |             | YOL084W |        |        |        |        |        | BBM_I02030 | 1 |      | 0 | 0 | NA     |        |                                                        |
| BBOV_I002050  | TA05285 | PF11_0289 |             | YKL005C |        |        |        |        |        | BBM_I02035 | 4 | api+ | 0 | 0 | Valid  |        |                                                        |
|               |         |           |             |         |        |        |        |        |        | BBM_I02040 | 1 |      | 0 | 0 | NA     |        |                                                        |
| BBOV_I002070  | TA05275 | PF08_0045 | LmjF36.3470 | YIL125W | K00164 | K00164 | K00164 | K00164 | K00164 | BBM_I02045 | 5 |      | 5 | 1 | K00164 | K00164 | 2-oxoglutarate dehydrogenase E1 component [EC:1.2.4.2] |
| BBOV_I002080  |         | MAL8P1.55 | LmjF26.2300 |         |        |        |        |        |        | BBM_I02050 | 3 |      | 0 | 0 | NA     |        |                                                        |
|               |         | PF11210w  |             |         |        |        |        |        |        | BBM_I02055 | 1 |      | 0 | 0 | NA     |        |                                                        |
|               |         |           |             | YPR198W |        |        |        |        |        | BBM_I02060 | 1 |      | 0 | 0 | NA     |        |                                                        |
|               |         |           |             |         |        |        |        |        |        | BBM_I02065 | 2 |      | 0 | 0 | NA     |        |                                                        |
| BBOV_I0011660 | TA16775 | PFL1040w  | LmjF15.0225 |         |        |        |        |        |        | BBM_I02070 | 4 | api+ | 0 | 0 | Valid  |        |                                                        |
| BBOV_I0011670 | TA16770 | PFL1045w  | LmjF30.2070 |         |        |        |        |        |        | BBM_I02075 | 4 | api+ | 0 | 0 | Valid  |        |                                                        |
| BBOV_I0011640 | TA16785 | PF07_0111 | LmjF19.0810 | YJL029C |        |        |        |        |        | BBM_I02080 | 5 |      | 0 | 0 | Valid  |        |                                                        |
|               |         |           |             | YDR371W |        |        |        |        | K01183 | BBM_I02085 | 1 |      | 1 | 1 | NA     |        |                                                        |
| BBOV_I0011630 | TA16800 | PF07_0110 |             | YPL063W |        |        |        |        |        | BBM_I02090 | 4 | api+ | 0 | 0 | Valid  |        |                                                        |
| BBOV_I0011620 | TA16805 | PFA_0165c |             |         |        |        |        |        |        | BBM_I02095 | 3 | api  | 0 | 0 | Valid  |        |                                                        |
| BBOV_I004310  | TA07155 | PFC0605w  |             |         |        |        |        |        |        | BBM_I02100 | 3 | api  | 0 | 0 | Valid  |        |                                                        |
| BBOV_I0007070 |         |           |             | YAR009C |        |        |        |        |        | BBM_I02105 | 2 |      | 0 | 0 | NA     |        |                                                        |
|               |         |           |             |         |        |        |        |        |        | BBM_I02110 | 0 |      | 0 | 0 | NA     |        |                                                        |
| BBOV_I004280  | TA02785 | PFL1675c  |             | YFL026W |        |        |        |        | K11213 | BBM_I02115 | 4 | api+ | 1 | 1 | Valid  |        |                                                        |
| BBOV_I004270  | TA07140 | PFL1680w  | LmjF05.0890 | YML049C | K12830 | K12830 | K12830 | K12830 | K12830 | BBM_I02120 | 5 |      | 4 | 1 | K12830 | K12830 | splicing factor 3B subunit 3                           |
|               |         | PFL1685w  |             |         |        |        |        |        |        | BBM_I02125 | 1 |      | 0 | 0 | NA     |        |                                                        |
|               |         |           |             |         |        |        |        |        |        | BBM_I02130 | 0 |      | 0 | 0 | NA     |        |                                                        |
| BBOV_I004260  | TA07135 | PFD0950w  | LmjF13.1480 | YDR002W |        |        | K03864 |        |        | BBM_I02135 | 5 |      | 1 | 1 | K03864 | K03864 | small monomeric GTPase [EC:3.6.5.2]                    |

|              |         |             |             |         |        |        |        |        |        |        |            |   |      |   |   |        |        |
|--------------|---------|-------------|-------------|---------|--------|--------|--------|--------|--------|--------|------------|---|------|---|---|--------|--------|
| BBOV_I004250 | TA07115 | PFD0960c    | LmjF34.3980 | YDL208W |        |        |        |        | K11129 | K11129 | BBM_I02140 | 5 |      | 2 | 1 | K11129 | K11129 |
|              |         |             |             | YDR098C |        |        |        |        |        |        | BBM_I02145 | 1 |      | 0 | 0 | NA     |        |
| BBOV_I004230 | TA07100 | PFD0985w    |             |         |        |        |        |        |        |        | BBM_I02150 | 3 | api  | 0 | 0 | Valid  |        |
| BBOV_I004100 | TA07095 | PF08_0063   | LmjF29.1270 | YDR258C | K03695 | K03695 |        |        |        |        | BBM_I02155 | 5 |      | 2 | 1 | K03695 | K03695 |
| BBOV_I004090 | TA07090 | PFL1635w    | LmjF26.2070 | YPL020C |        |        |        |        |        | K08592 | BBM_I02160 | 5 |      | 1 | 1 | K08592 | K08592 |
|              |         |             |             |         |        |        |        |        |        |        | BBM_I02165 | 0 |      | 0 | 0 | NA     |        |
|              | TA07080 | MAL8P1.77   |             |         |        |        |        |        |        |        | BBM_I02170 | 2 |      | 0 | 0 | NA     |        |
|              | TA07075 | MAL8P1.76   | LmjF35.4890 | YER179W |        | K04482 | K10872 | K10872 | K10872 |        | BBM_I02175 | 4 |      | 4 | 2 | NA     |        |
|              |         |             |             |         |        |        |        |        |        |        | BBM_I02180 | 0 |      | 0 | 0 | NA     |        |
| BBOV_I004080 | TA09395 | MAL8P1.78   |             | YDR171W |        |        |        |        |        | K13993 | BBM_I02185 | 4 | api+ | 1 | 1 | Valid  |        |
|              |         | PFI0090c    | LmjF29.1280 | YHR185C |        |        |        |        |        |        | BBM_I02190 | 3 |      | 0 | 0 | NA     |        |
| BBOV_I004070 | TA09390 | PFC0310c    | LmjF32.1530 |         | K01358 | K01358 | K01358 | K01529 |        |        | BBM_I02195 | 4 | api+ | 4 | 2 | K01358 | K01358 |
|              | TA12545 | MAL8P1.136  |             |         |        | K13121 | K13121 |        |        |        | BBM_I02200 | 2 |      | 2 | 1 | NA     |        |
|              |         |             |             |         |        |        |        |        |        |        | BBM_I02205 | 0 |      | 0 | 0 | NA     |        |
| BBOV_I003320 | TA07500 | PFC0325c    |             |         |        |        |        |        |        |        | BBM_I02210 | 3 | api  | 0 | 0 | Valid  |        |
|              |         |             |             |         |        |        |        |        |        |        | BBM_I02215 | 0 |      | 0 | 0 | NA     |        |
| BBOV_I002650 |         | PF14_0696   | LmjF35.2130 |         |        |        |        |        |        |        | BBM_I02220 | 3 |      | 0 | 0 | NA     |        |
| BBOV_I002640 | TA19720 | MAL8P1.85   |             |         |        |        |        |        |        |        | BBM_I02225 | 3 | api  | 0 | 0 | Valid  |        |
|              |         |             | LmjF15.1465 | YDR213W |        |        |        |        |        |        | BBM_I02230 | 2 |      | 0 | 0 | NA     |        |
| BBOV_I002620 |         | PFC0221c    |             |         |        |        |        |        |        |        | BBM_I02235 | 2 |      | 0 | 0 | NA     |        |
| BBOV_I002500 | TA03270 | PFI1330c    |             |         |        |        |        |        |        |        | BBM_I02240 | 3 | api  | 0 | 0 | Valid  |        |
| BBOV_I002510 |         | PFI1325w    |             | YHR132C |        |        |        |        |        | K08783 | BBM_I02245 | 3 |      | 1 | 1 | NA     |        |
| BBOV_I002520 |         |             |             | YJR021C |        |        |        |        |        |        | BBM_I02250 | 2 |      | 0 | 0 | NA     |        |
| BBOV_I002530 | TA03375 | PFI1215w    | LmjF30.1830 | YDL030W | K12827 | K12827 | K12827 | K12827 | K12827 |        | BBM_I02255 | 5 |      | 5 | 1 | K12827 | K12827 |
| BBOV_I002540 | TA03430 | PFI1340w    | LmjF29.1960 |         | K01676 | K01676 | K01676 | K01676 |        |        | BBM_I02260 | 4 | api+ | 4 | 1 | K01676 | K01676 |
| BBOV_I002550 | TA03435 | PFI1205c    |             |         |        |        |        |        |        |        | BBM_I02265 | 3 | api  | 0 | 0 | Valid  |        |
| BBOV_I002560 | TA03650 | PFI1190w    |             |         |        |        |        |        |        |        | BBM_I02270 | 3 | api  | 0 | 0 | Valid  |        |
| BBOV_I002570 | TA03705 |             |             | YOR148C |        |        |        |        |        |        | BBM_I02275 | 3 |      | 0 | 0 | NA     |        |
| BBOV_I002580 | TA03765 | PFI0925w    | LmjF18.1660 | YJL101C | K11204 | K11204 | K11204 | K11204 | K11204 |        | BBM_I02280 | 5 |      | 5 | 1 | K11204 | K11204 |
| BBOV_I002590 | TA19740 |             | LmjF16.0350 |         |        |        |        |        |        |        | BBM_I02285 | 3 |      | 0 | 0 | NA     |        |
|              |         |             | LmjF34.0540 |         |        |        |        |        |        |        | BBM_I02290 | 1 |      | 0 | 0 | NA     |        |
| BBOV_I002610 | TA19730 | PFI0920c    |             |         | K05539 | K05539 | K05539 |        |        |        | BBM_I02295 | 3 | api  | 3 | 1 | K05539 | K05539 |
| BBOV_I002600 | TA19735 | PFI1130c    | LmjF29.0140 | YIL021W | K03011 | K03011 | K03011 | K03011 | K03011 |        | BBM_I02300 | 5 |      | 5 | 1 | K03011 | K03011 |
| BBOV_I002340 |         | PF10_0147   | LmjF28.0270 | YDL045C | K00953 |        | K00953 |        | K00953 |        | BBM_I02305 | 4 |      | 3 | 1 | K00953 | K00953 |
| BBOV_I002390 | TA03820 | PF10_0148   | LmjF02.0240 | YKL095W |        |        |        | K13666 |        |        | BBM_I02310 | 5 |      | 1 | 1 | K13666 | K13666 |
| BBOV_I002400 | TA03175 | PF10_0149   | LmjF12.0250 | YNL247W | K01883 | K01883 | K01883 | K01883 | K01883 |        | BBM_I02315 | 5 |      | 5 | 1 | K01883 | K01883 |
|              | TA13620 |             | LmjF17.0190 |         |        |        |        |        | K01768 |        | BBM_I02320 | 2 |      | 1 | 1 | NA     |        |
| BBOV_I002420 |         |             |             |         |        |        |        |        |        |        | BBM_I02325 | 1 |      | 0 | 0 | NA     |        |
|              | TA03185 | PF10_0063   | LmjF13.0450 |         |        |        |        |        |        |        | BBM_I02330 | 3 |      | 0 | 0 | NA     |        |
|              |         |             |             |         |        |        |        |        |        |        | BBM_I02335 | 0 |      | 0 | 0 | NA     |        |
|              | TA03190 | PF10_0062   | LmjF25.1840 | YDL165W |        |        |        | K12580 | K12605 |        | BBM_I02340 | 4 |      | 2 | 2 | NA     |        |
| BBOV_I002440 | TA03195 | PF10_0061   |             | YDR014W |        |        |        |        |        |        | BBM_I02345 | 4 | api+ | 0 | 0 | Valid  |        |
| BBOV_I002450 | TA03200 | PF10_0060   |             | YLR307W |        |        |        |        | K01452 |        | BBM_I02350 | 4 | api+ | 1 | 1 | Valid  |        |
| BBOV_I002470 | TA03205 |             |             | YBR293W |        |        |        |        |        |        | BBM_I02355 | 3 |      | 0 | 0 | NA     |        |
| BBOV_I001460 | TA08465 | PFI0895c    |             |         |        |        |        |        |        |        | BBM_I02365 | 3 | api  | 0 | 0 | Valid  |        |
|              | TA08460 | PF14_0179   | LmjF10.0620 |         |        |        |        |        |        |        | BBM_I02370 | 3 |      | 0 | 0 | NA     |        |
| BBOV_I001480 | TA08455 | PFD0300w    |             |         |        |        |        |        |        |        | BBM_I02375 | 3 | api  | 0 | 0 | Valid  |        |
| BBOV_I001490 | TA08450 | PFD0305c    | LmjF28.2430 | YBR127C | K02147 | K02147 | K02147 | K02147 | K02147 |        | BBM_I02380 | 5 |      | 5 | 1 | K02147 | K02147 |
|              |         |             |             |         |        |        |        |        |        |        | BBM_I02385 | 0 |      | 0 | 0 | NA     |        |
| BBOV_I001520 | TA08435 | MAL13P1.190 | LmjF27.1460 | YER021W | K03033 | K03033 | K03033 | K03033 | K03033 |        | BBM_I02390 | 5 |      | 5 | 1 | K03033 | K03033 |
| BBOV_I001530 | TA08430 |             |             |         |        |        |        |        |        |        | BBM_I02395 | 2 | piro | 0 | 0 | Valid  |        |
| BBOV_I001540 | TA08420 | PF14_0615   | LmjF05.1140 | YLR447C | K02146 | K02146 | K02146 | K02146 | K02146 |        | BBM_I02405 | 5 |      | 5 | 1 | K02146 | K02146 |
| BBOV_I001550 | TA08415 | PF14_0613   |             | YLR324W |        |        |        |        |        |        | BBM_I02410 | 4 | api+ | 0 | 0 | Valid  |        |
| BBOV_I001560 | TA08405 | PF14_0608   |             |         | K11664 | K11664 |        |        |        |        | BBM_I02415 | 3 | api  | 2 | 1 | Valid  |        |

|                                                              |  |
|--------------------------------------------------------------|--|
| NHP2, NOLA2, H/ACA ribonucleoprotein complex subunit 2       |  |
|                                                              |  |
| ATP-dependent Clp protease ATP-binding subunit ClpB          |  |
| sentrin-specific protease 1 [EC:3.4.22.-]                    |  |
|                                                              |  |
|                                                              |  |
|                                                              |  |
|                                                              |  |
| ATP-dependent Clp protease, protease subunit [EC:3.4.21.92]  |  |
|                                                              |  |
|                                                              |  |
|                                                              |  |
|                                                              |  |
|                                                              |  |
|                                                              |  |
|                                                              |  |
|                                                              |  |
|                                                              |  |
|                                                              |  |
| splicing factor 3A subunit 3                                 |  |
| fumarate hydratase, class I [EC:4.2.1.2]                     |  |
|                                                              |  |
|                                                              |  |
|                                                              |  |
| glutamate--cysteine ligase catalytic subunit [EC:6.3.2.2]    |  |
|                                                              |  |
|                                                              |  |
|                                                              |  |
| tRNA-dihydrouridine synthase A [EC:1.-.-.-]                  |  |
| DNA-directed RNA polymerase II subunit C                     |  |
| FAD synthetase [EC:2.7.7.2]                                  |  |
| UDP-GlcNAc:polypeptide alpha-N-acetylglucosaminyltransferase |  |
| cysteinyl-tRNA synthetase [EC:6.1.1.16]                      |  |
|                                                              |  |
|                                                              |  |
|                                                              |  |
|                                                              |  |
|                                                              |  |
|                                                              |  |
|                                                              |  |
|                                                              |  |
| V-type H+-transporting ATPase subunit B [EC:3.6.3.14]        |  |
|                                                              |  |
|                                                              |  |
| 26S proteasome regulatory subunit N3                         |  |
|                                                              |  |
|                                                              |  |
| V-type H+-transporting ATPase subunit AC39 [EC:3.6.3.14]     |  |
|                                                              |  |
|                                                              |  |















|               |         |             |             |         |        |        |        |        |        |             |   |      |   |   |        |        |                                                               |
|---------------|---------|-------------|-------------|---------|--------|--------|--------|--------|--------|-------------|---|------|---|---|--------|--------|---------------------------------------------------------------|
| BBOV_I004630  | TA12355 | PFC0886w    |             |         |        |        |        |        |        | BBM_I04050  | 3 | api  | 0 | 0 | Valid  |        |                                                               |
| BBOV_I003750  | TA20705 | PF08_0034   |             | YGR252W | K06062 | K06062 | K06062 |        | K06062 | BBM_I04055  | 4 | api+ | 4 | 1 | K06062 | K06062 | histone acetyltransferase [EC:2.3.1.48]                       |
| BBOV_I003740  | TA20700 | PFC0245c    | LmjF05.1070 | YDR141C |        |        |        |        |        | BBM_I04060  | 5 |      | 0 | 0 | Valid  |        |                                                               |
| BBOV_I003730  | TA20695 | PF08_0033   |             | YML103C |        |        |        |        | K14311 | BBM_I04070  | 4 | api+ | 1 | 1 | Valid  |        |                                                               |
| BBOV_I003720  | TA20690 | PFL1050w    |             |         |        |        |        |        |        | BBM_I04075  | 3 | api  | 0 | 0 | Valid  |        |                                                               |
|               |         |             |             |         |        |        |        |        |        | BBM_I04080  | 0 |      | 0 | 0 | NA     |        |                                                               |
| BBOV_I003700  | TA20680 | PF13_0241   |             | YGR101W |        |        |        |        | K09650 | BBM_I04085  | 4 | api+ | 1 | 1 | Valid  |        |                                                               |
|               | TA20675 |             |             |         |        |        |        |        |        | BBM_I04090  | 1 |      | 1 | 1 | NA     |        |                                                               |
| BBOV_I003630  | TA20635 | MAL13P1.390 |             |         | K00605 | K00605 |        |        |        | BBM_I04095  | 3 | api  | 2 | 1 | Valid  |        |                                                               |
| BBOV_I003640  | TA20640 |             |             |         |        |        |        |        |        | BBM_I04100  | 2 | piro | 0 | 0 | Valid  |        |                                                               |
| BBOV_I003650  | TA20645 | MAL13P1.405 |             | YIL030C |        |        |        |        | K10661 | BBM_I04110  | 4 | api+ | 1 | 1 | Valid  |        |                                                               |
|               |         |             |             |         |        |        |        |        |        | BBM_I04115  | 0 |      | 0 | 0 | NA     |        |                                                               |
| BBOV_I003660  | TA20650 | MAL13P1.221 | LmjF16.0540 |         | K00609 | K00609 | K00609 | K00609 |        | BBM_I04120  | 4 | api+ | 4 | 1 | K00609 | K00609 | aspartate carbamoyltransferase catalytic subunit [EC:2.1.3.2] |
|               |         | PFL1205c    |             |         |        |        |        |        |        | BBM_I04125  | 1 |      | 0 | 0 | NA     |        |                                                               |
|               |         |             |             |         |        |        |        |        |        | BBM_I04130  | 0 |      | 0 | 0 | NA     |        |                                                               |
| BBOV_I003670  | TA20660 |             |             | YMR317W |        |        |        |        |        | BBM_I04135  | 3 |      | 0 | 0 | NA     |        |                                                               |
| BBOV_I003680  | TA20665 | MAL13P1.219 | LmjF30.0640 |         |        |        |        |        |        | BBM_I04140  | 4 | api+ | 0 | 0 | Valid  |        |                                                               |
| BBOV_I003570  | TA20600 | MAL13P1.217 | LmjF30.0100 |         |        |        |        |        |        | BBM_I04145  | 4 | api+ | 0 | 0 | Valid  |        |                                                               |
| BBOV_I003580  | TA20605 | MAL13P1.218 | LmjF33.2520 | YDL103C | K00972 | K00972 | K00972 | K00972 | K00972 | BBM_I04150  | 5 |      | 5 | 1 | K00972 | K00972 | UDP-N-acetylglucosamine pyrophosphorylase [EC:2.7.7.23]       |
| BBOV_I003590  | TA20610 | PF13_0238   |             |         |        |        |        |        |        | BBM_I04155  | 3 | api  | 0 | 0 | Valid  |        |                                                               |
| BBOV_I003600  | TA20620 | MAL13P1.380 |             |         |        |        |        |        |        | BBM_I04160  | 3 | api  | 0 | 0 | Valid  |        |                                                               |
| BBOV_I003610  | TA20625 | MAL13P1.385 |             | YPR178W | K12662 | K12662 |        | K12662 |        | BBM_I04165  | 4 | api+ | 3 | 1 | K12662 | K12662 | U4/U6 small nuclear ribonucleoprotein PRP4                    |
| BBOV_I003560  | TA20595 | PF13_0235   |             | YER093C |        |        |        |        |        | BBM_I04170  | 4 | api+ | 0 | 0 | Valid  |        |                                                               |
| BBOV_I003550  | TA20590 | PF13_0234   | LmjF27.1805 | YKR097W | K01610 | K01610 | K01610 | K01610 | K01610 | BBM_I04175  | 5 |      | 5 | 1 | K01610 | K01610 | phosphoenolpyruvate carboxykinase (ATP) [EC:4.1.1.49]         |
| BBOV_I003490  | TA20555 | PF13_0233   |             |         |        |        |        |        |        | BBM_I04180  | 3 | api  | 0 | 0 | Valid  |        |                                                               |
| BBOV_I003500  | TA20560 | MAL13P1.320 | P131.02     |         |        |        |        |        |        | BBM_I04185  | 4 | api+ | 0 | 0 | Valid  |        |                                                               |
| BBOV_I003520  | TA20575 | PF13_0336   |             | YAL021C |        |        |        |        | K12603 | BBM_I04190  | 4 | api+ | 1 | 1 | Valid  |        |                                                               |
| BBOV_I003530  | TA20580 | PF13_0315   | LmjF25.0520 | YGL044C |        |        |        |        | K14407 | BBM_I04195  | 5 |      | 1 | 1 | K14407 | K14407 | cleavage stimulation factor subunit 2                         |
| BBOV_I003540  | TA20585 | MAL13P1.289 | LmjF28.0330 | YOL021C | K12585 | K12585 | K12585 | K12585 | K12585 | BBM_I04200  | 5 |      | 5 | 1 | K12585 | K12585 | exosome complex exonuclease DIS3/RRP44 [EC:3.1.13.-]          |
|               |         |             |             |         |        |        |        |        |        | BBM_I04205  | 0 |      | 0 | 0 | NA     |        |                                                               |
| BBOV_I003470  | TA20545 | PF13_0316   | LmjF33.3150 | YDR064W | K02953 | K02953 | K02953 | K02953 | K02953 | BBM_I04210  | 5 |      | 5 | 1 | K02953 | K02953 | small subunit ribosomal protein S13e                          |
| BBOV_I003460  |         | MAL13P1.294 |             | YGR173W | K06944 |        |        |        |        | BBM_I04215  | 3 |      | 2 | 1 | NA     |        |                                                               |
| BBOV_I003450  | TA20540 | MAL13P1.292 | LmjF35.3160 | YDR236C |        | K00953 | K00953 |        |        | BBM_I04220  | 5 |      | 3 | 2 | NA     |        |                                                               |
| BBOV_I003440  | TA20535 |             |             |         |        |        |        |        |        | BBM_I04225  | 2 | piro | 0 | 0 | Valid  |        |                                                               |
| BBOV_I003430  | TA03295 | MAL8P1.19   | LmjF34.2050 | YDL031W | K14808 | K14808 |        | K14808 | K14808 | BBM_I04230  | 5 |      | 4 | 1 | K14808 | K14808 | DDX54, DBP10, ATP-dependent RNA helicase DDX54/DBP10          |
| BBOV_I003420  | TA03280 | PFE0830c    | LmjF22.1240 | YOL023W | K02519 | K02519 | K02519 | K02519 | K02519 | BBM_I04235  | 5 |      | 5 | 1 | K02519 | K02519 | translation initiation factor IF-2                            |
| BBOV_I003370  | TA03240 | PFC0800w    | LmjF05.1040 |         |        |        |        |        |        | BBM_I04240  | 4 | api+ | 0 | 0 | Valid  |        |                                                               |
| BBOV_I003390  | TA03255 | PF08_0016   |             |         |        |        |        |        |        | BBM_I04245  | 3 | api  | 0 | 0 | Valid  |        |                                                               |
|               |         |             |             | YKL075C |        |        |        |        |        | BBM_I04250  | 1 |      | 0 | 0 | NA     |        |                                                               |
| BBOV_I003410  | TA03275 | PF08_0014   |             |         |        |        |        |        |        | BBM_I04255  | 3 | api  | 0 | 0 | Valid  |        |                                                               |
|               |         |             |             |         |        |        |        |        |        | BBM_I04260  | 0 |      | 0 | 0 | NA     | Valid  | BMN family (1)                                                |
|               |         | MAL13P1.334 |             | YBL107C |        |        |        |        |        | BBM_I04265  | 2 |      | 0 | 0 | NA     | Valid  | BMN family (2)                                                |
|               |         |             |             |         |        |        |        |        |        | BBM_I04270  | 0 |      | 0 | 0 | NA     | Valid  | Tpr related protein, putative                                 |
|               |         |             |             |         |        |        |        |        |        | BBM_I04275  | 0 |      | 0 | 0 | NA     | Valid  | BMN family (1)                                                |
|               |         |             |             | YNL309W |        |        |        |        |        | BBM_I04280  | 1 |      | 0 | 0 | NA     | Valid  | BMN family (2)                                                |
|               |         |             |             |         |        |        |        |        |        | BBM_I04285  | 0 |      | 0 | 0 | NA     |        |                                                               |
|               |         |             |             |         |        |        |        |        |        | BBM_I000005 | 0 |      | 0 | 0 | NA     | Valid  | BMN family (1)                                                |
|               |         |             |             |         |        |        |        |        |        | BBM_I000010 | 0 |      | 0 | 0 | NA     |        |                                                               |
|               |         |             |             |         |        |        |        |        |        | BBM_I000015 | 0 |      | 0 | 0 | NA     | Valid  | Tpr related protein, putative                                 |
|               |         |             | LmjF36.4980 |         |        |        |        |        |        | BBM_I000020 | 1 |      | 0 | 0 | NA     | Valid  | BMN family (2)                                                |
| BBOV_IV000750 | TA20055 | PF13_0323   | LmjF21.1450 | YBR133C | K02516 | K02516 | K02516 | K02516 | K02516 | BBM_I000025 | 5 |      | 5 | 1 | K02516 | K02516 | protein arginine N-methyltransferase 5 [EC:2.1.1.125]         |
| BBOV_IV000740 | TA20050 | PF13_0324   | LmjF29.0220 | YIL109C |        |        |        |        | K14007 | BBM_I000030 | 5 |      | 1 | 1 | K14007 | K14007 | protein transport protein SEC24                               |
| BBOV_IV000730 | TA20045 | MAL13P1.304 |             |         |        |        |        |        |        | BBM_I000035 | 3 | api  | 0 | 0 | Valid  |        |                                                               |
|               | TA20030 | MAL13P1.307 |             |         |        |        |        |        |        | BBM_I000040 | 2 |      | 0 | 0 | NA     |        |                                                               |

|                |         |             |             |         |        |        |        |        |        |              |   |      |   |   |        |        |                                                                      |
|----------------|---------|-------------|-------------|---------|--------|--------|--------|--------|--------|--------------|---|------|---|---|--------|--------|----------------------------------------------------------------------|
| BBOV_IV000710  | TA20025 | PF13_0327   |             |         |        |        |        |        |        | BBM_III00045 | 3 | api  | 0 | 0 | Valid  |        |                                                                      |
| BBOV_IV000700  | TA20020 | MAL13P1.308 |             | YDR197W |        |        |        |        |        | BBM_III00050 | 4 | api+ | 0 | 0 | Valid  |        |                                                                      |
| BBOV_I000760   | TA15505 | PF11_0394   |             |         |        |        |        |        |        | BBM_III00055 | 3 | api  | 0 | 0 | Valid  |        |                                                                      |
| BBOV_I000750   | TA15510 | PF11_0393   | LmjF34.2830 | YIL008W | K12161 | K12161 | K12161 | K12161 | K12161 | BBM_III00060 | 5 |      | 5 | 1 | K12161 | K12161 | ubiquitin related modifier 1                                         |
| BBOV_I0007000  | TA14495 | PFA_0245w   |             |         |        |        |        |        |        | BBM_III00065 | 3 | api  | 0 | 0 | Valid  |        |                                                                      |
| BBOV_IV010560  | TA18005 | PFA_0120c   |             |         |        |        |        |        |        | BBM_III00070 | 3 | api  | 0 | 0 | Valid  |        |                                                                      |
| BBOV_III004050 | TA02635 | PF13_0023   |             | YOL005C |        | K03008 | K03008 |        | K03008 | BBM_III00075 | 4 | api+ | 3 | 1 | K03008 | K03008 | DNA-directed RNA polymerase II subunit J                             |
| BBOV_IV000800  | TA20065 | PF11_0292   | LmjF22.0670 | YML094W | K04797 | K04797 |        | K04797 | K04797 | BBM_III00080 | 5 |      | 4 | 1 | K04797 | K04797 | prefoldin alpha subunit                                              |
| BBOV_I004150   | TA14770 | MAL13P1.260 |             |         |        |        |        |        |        | BBM_III00085 | 3 | api  | 0 | 0 | Valid  |        |                                                                      |
|                |         |             |             |         |        |        |        |        |        | BBM_III00090 | 0 |      | 0 | 0 | NA     |        |                                                                      |
| BBOV_I004130   | TA14760 | PF0980w     | LmjF34.0230 |         |        |        |        |        |        | BBM_III00095 | 4 | api+ | 0 | 0 | Valid  |        |                                                                      |
| BBOV_I004120   | TA14755 |             |             |         |        |        |        |        |        | BBM_III00100 | 2 | piro | 0 | 0 | Valid  |        |                                                                      |
| BBOV_I004110   | TA14750 | PF13_0268   | LmjF24.0040 | YJL177W | K02880 | K02880 | K02880 | K02880 | K02880 | BBM_III00105 | 5 |      | 5 | 1 | K02880 | K02880 | large subunit ribosomal protein L17e                                 |
| BBOV_I004090   | TA14740 |             | LmjF36.1920 |         |        |        |        |        |        | BBM_III00110 | 3 |      | 0 | 0 | NA     |        |                                                                      |
| BBOV_I004100   | TA14745 | MAL13P1.259 |             | YPL162C |        |        |        |        |        | BBM_III00115 | 4 | api+ | 0 | 0 | Valid  |        |                                                                      |
| BBOV_I004080   | TA14735 | PF14_0323   | LmjF09.0930 | YBR109C | K02183 | K02183 | K02183 | K02183 | K02183 | BBM_III00120 | 5 |      | 5 | 1 | K02183 | K02183 | calmodulin                                                           |
| BBOV_I004070   | TA14720 | MAL13P1.256 |             |         |        |        |        |        |        | BBM_III00125 | 3 | api  | 0 | 0 | Valid  |        |                                                                      |
| BBOV_I004020   | TA14695 | PF14_0221   | LmjF05.0460 | YNR053C | K14537 | K14537 | K14537 | K14537 | K14537 | BBM_III00130 | 5 |      | 5 | 1 | K14537 | K14537 | NUG2, GNL2, nuclear GTP-binding protein                              |
| BBOV_I004010   | TA14685 |             |             |         |        |        |        |        |        | BBM_III00135 | 2 | piro | 0 | 0 | Valid  |        |                                                                      |
|                |         | PFB0395w    |             |         |        |        |        |        |        | BBM_III00140 | 1 |      | 0 | 0 | NA     |        |                                                                      |
| BBOV_I004030   | TA14700 | PFB0391c    |             | YOR340C |        |        |        |        | K03004 | BBM_III00145 | 4 | api+ | 1 | 1 | Valid  |        |                                                                      |
| BBOV_I004040   | TA14705 | PFB0390w    |             |         |        |        |        |        |        | BBM_III00150 | 3 | api  | 0 | 0 | Valid  |        |                                                                      |
| BBOV_I004050   | TA14710 | MAL7P1.83   | LmjF33.1490 |         |        |        |        |        |        | BBM_III00155 | 4 | api+ | 0 | 0 | Valid  |        |                                                                      |
| BBOV_I004060   | TA14715 | MAL13P1.257 |             | YCR090C |        |        |        |        |        | BBM_III00160 | 4 | api+ | 0 | 0 | Valid  |        |                                                                      |
| BBOV_I000770   | TA15475 | PF11_0395   |             |         |        | K01769 | K01769 |        |        | BBM_III00165 | 3 | api  | 2 | 1 | Valid  |        |                                                                      |
|                | TA15465 |             |             | YDR165W |        |        |        |        |        | BBM_III00170 | 2 |      | 0 | 0 | NA     |        |                                                                      |
| BBOV_I000780   | TA15470 |             | LmjF26.1850 | YBR021W |        |        |        |        |        | BBM_III00175 | 4 |      | 0 | 0 | NA     |        |                                                                      |
|                |         |             |             |         |        |        |        |        |        | BBM_III00180 | 0 |      | 0 | 0 | NA     |        |                                                                      |
|                |         |             | L302.09     |         |        |        |        |        |        | BBM_III00185 | 1 |      | 0 | 0 | NA     |        |                                                                      |
| BBOV_IV011280  | TA09585 | PF00785c    |             |         |        |        |        |        |        | BBM_III00190 | 3 | api  | 0 | 0 | Valid  |        |                                                                      |
| BBOV_III000770 | TA18175 | PF11_0382   |             |         |        |        |        |        |        | BBM_III00195 | 3 | api  | 0 | 0 | Valid  |        |                                                                      |
| BBOV_I004240   | TA14805 | PFE0100w    | LmjF31.2890 | YMR231W |        |        |        |        |        | BBM_III00200 | 5 |      | 0 | 0 | Valid  |        |                                                                      |
| BBOV_IV011540  | TA16615 | PF11_0384   | LmjF34.0050 |         |        |        |        |        |        | BBM_III00205 | 4 | api+ | 0 | 0 | Valid  |        |                                                                      |
| BBOV_IV011520  | TA16620 | PF11_0380   |             | YMR161W | K09518 | K09518 |        | K09518 |        | BBM_III00210 | 4 | api+ | 3 | 1 | K09518 | K09518 | DnaJ homolog subfamily B member 12                                   |
| BBOV_IV011530  |         |             |             | YLR015W | K14964 |        |        | K14967 |        | BBM_III00215 | 2 |      | 2 | 2 | NA     |        |                                                                      |
| BBOV_I004180   |         | MAL13P1.12  |             |         |        |        |        |        |        | BBM_III00220 | 2 |      | 0 | 0 | NA     |        |                                                                      |
| BBOV_I004190   | TA14790 |             |             |         | K04345 | K04345 |        |        |        | BBM_III00225 | 2 | piro | 2 | 1 | K04345 | K04345 | protein kinase A [EC:2.7.11.11]                                      |
| BBOV_I004200   | TA14795 | PFB0860c    | LmjF36.1850 | YHR065C | K14777 | K14777 | K14777 | K14777 | K14777 | BBM_III00230 | 5 |      | 5 | 1 | K14777 | K14777 | DDX47, RRP3, ATP-dependent RNA helicase DDX47/RRP3 [EC:3.6.4.13]     |
| BBOV_I004230   | TA14800 | PFB0865w    | LmjF33.3190 | YLR275W | K11096 | K11096 | K11096 | K11096 | K11096 | BBM_III00235 | 5 |      | 5 | 1 | K11096 | K11096 | small nuclear ribonucleoprotein D2                                   |
| BBOV_I003770   | TA20715 | PF14_0198   | LmjF36.3840 | YBR121C | K01880 | K01880 | K01880 | K01880 | K01880 | BBM_III00240 | 5 |      | 5 | 1 | K01880 | K01880 | glycyl-tRNA synthetase [EC:6.1.1.14]                                 |
| BBOV_I003790   | TA20725 | MAL13P1.226 | LmjF27.0270 |         |        |        |        |        |        | BBM_III00245 | 4 | api+ | 0 | 0 | Valid  |        |                                                                      |
| BBOV_I003810   | TA20735 | PF14_0254   | LmjF33.0410 | YOL090W | K08735 | K08735 | K08735 | K08735 | K08735 | BBM_III00250 | 5 |      | 5 | 1 | K08735 | K08735 | DNA mismatch repair protein MSH2                                     |
|                |         |             | LmjF13.1650 | YLR352W |        |        |        |        |        | BBM_III00255 | 2 |      | 0 | 0 | NA     | Valid  | BMN family (2)                                                       |
|                |         | PF14_0541   |             |         |        |        | K01507 |        |        | BBM_III00260 | 1 |      | 1 | 1 | NA     |        |                                                                      |
| BBOV_I000740   | TA15515 |             | LmjF25.1320 | YDL188C | K04382 | K04382 |        | K04382 | K04382 | BBM_III00265 | 4 |      | 4 | 1 | K04382 | K04382 | protein phosphatase 2 (formerly 2A), catalytic subunit [EC:3.1.3.16] |
|                | TA15535 | PF11_0409   |             |         |        |        |        |        |        | BBM_III00270 | 2 |      | 0 | 0 | NA     |        |                                                                      |
| BBOV_I000710   | TA15545 | PF11_0396   | LmjF32.1690 | YBL056W | K01090 | K01090 | K01090 | K14803 | K14803 | BBM_III00275 | 5 |      | 5 | 2 | K01090 | K01090 | protein phosphatase [EC:3.1.3.16]                                    |
| BBOV_I000700   | TA15573 | PF11_0386   | LmjF36.4070 | YPR166C | K02954 | K02954 | K02954 |        |        | BBM_III00280 | 5 |      | 3 | 1 | K02954 | K02954 | small subunit ribosomal protein S14                                  |
|                |         |             |             | YMR218C |        |        |        |        |        | BBM_III00285 | 1 |      | 0 | 0 | NA     |        |                                                                      |
| BBOV_I000680   | TA15585 | PF11_0407   | LmjF21.0420 | YDR376W | K00528 | K00528 | K00528 | K00528 | K00528 | BBM_III00290 | 5 |      | 5 | 1 | K00528 | K00528 | ferredoxin--NADP+ reductase [EC:1.18.1.2]                            |
|                |         |             |             |         |        |        |        |        |        | BBM_III00295 | 0 |      | 0 | 0 | NA     |        |                                                                      |
| BBOV_I000630   |         |             | LmjF36.5200 |         |        |        |        |        |        | BBM_III00300 | 2 |      | 0 | 0 | NA     |        |                                                                      |
| BBOV_I000640   | TA15600 | PFL0490c    | LmjF35.1950 | YNL315C |        | K07555 | K07555 |        | K07555 | BBM_III00305 | 5 |      | 3 | 1 | K07555 | K07555 | ATP synthase mitochondrial F1 complex assembly factor 1              |
| BBOV_I000650   | TA15610 | PFL0485w    | LmjF36.5040 | YLR459W |        |        |        |        | K05293 | BBM_III00310 | 5 |      | 1 | 1 | K05293 | K05293 | phosphatidylinositol glycan, class U                                 |









|               |         |             |             |           |        |        |        |        |        |        |              |   |      |   |   |        |        |
|---------------|---------|-------------|-------------|-----------|--------|--------|--------|--------|--------|--------|--------------|---|------|---|---|--------|--------|
| BBOV_IV010180 | TA02935 | PF14_0215   | LmjF15.1410 | YOL013C   |        |        |        | K10601 | K10601 | K10601 | BBM_III01120 | 5 |      | 3 | 1 | K10601 | K10601 |
| BBOV_IV010190 | TA02940 | PF07_0046   |             | YDR116C   |        |        |        |        |        |        | BBM_III01125 | 4 | api+ | 0 | 0 | Valid  |        |
| BBOV_IV010200 | TA02965 | PF14_0205   | LmjF34.0440 | YLR333C   | K02975 | K02975 | K02975 | K02975 | K02975 | K02975 | BBM_III01130 | 5 |      | 5 | 1 | K02975 | K02975 |
| BBOV_IV011150 | TA02970 | PF14_0207   | LmjF29.1320 | YNR003C   | K03025 | K03025 | K03025 |        |        | K03025 | BBM_III01135 | 5 |      | 4 | 1 | K03025 | K03025 |
|               |         | PFB0255w    |             |           |        |        |        |        |        |        | BBM_III01140 | 1 |      | 0 | 0 | NA     |        |
|               |         | PF11_0347   |             |           |        |        |        |        |        |        | BBM_III01145 | 1 |      | 0 | 0 | NA     |        |
|               |         |             |             | YOR208W   |        |        |        |        |        | K01104 | BBM_III01150 | 1 |      | 1 | 1 | NA     |        |
| BBOV_IV011240 | TA02975 |             |             |           |        |        |        |        |        |        | BBM_III01155 | 2 | piro | 0 | 0 | Valid  |        |
| BBOV_IV011230 | TA02980 | PF11_0344   |             |           | K13845 | K13845 | K13845 |        |        |        | BBM_III01160 | 3 | api  | 3 | 1 | K13845 | K13845 |
| BBOV_IV011220 | TA02985 | PF11_0343   | LmjF09.1020 | YCR094W   |        |        |        |        |        |        | BBM_III01165 | 5 |      | 0 | 0 | Valid  |        |
| BBOV_IV011210 | TA02990 | PF11_0342   |             |           |        |        |        |        |        |        | BBM_III01170 | 3 | api  | 0 | 0 | Valid  |        |
| BBOV_IV011190 | TA03005 | PFB0250w    | LmjF35.4940 | YGL233W   |        |        |        |        |        |        | BBM_III01175 | 5 |      | 0 | 0 | Valid  |        |
| BBOV_IV011180 | TA03010 |             |             |           |        |        |        |        |        |        | BBM_III01180 | 2 | piro | 0 | 0 | Valid  |        |
| BBOV_IV011160 | TA03020 |             |             |           | K12813 |        |        |        |        |        | BBM_III01185 | 2 | piro | 1 | 1 | Valid  |        |
| BBOV_IV002910 | TA03030 | PFA_0335w   | LmjF13.0220 | YOR089C   | K07976 | K07976 | K07976 | K07976 | K07976 | K07976 | BBM_III01190 | 5 |      | 5 | 1 | K07976 | K07976 |
| BBOV_IV002900 | TA03035 | PFIO655c    |             |           |        |        |        |        |        |        | BBM_III01195 | 3 | api  | 0 | 0 | Valid  |        |
| BBOV_IV002890 |         | PF11_0199   | LmjF35.2360 |           |        |        |        |        |        |        | BBM_III01200 | 3 |      | 0 | 0 | NA     |        |
| BBOV_IV002880 | TA03045 | PF13_0236   | LmjF05.1010 | YOL124C   |        |        |        |        |        |        | BBM_III01205 | 5 |      | 0 | 0 | Valid  |        |
| BBOV_IV002920 | TA03050 | PF10_0087   | LmjF31.1610 | YLR172C   | K00586 | K00586 | K00586 | K00586 | K00586 | K00586 | BBM_III01210 | 5 |      | 5 | 1 | K00586 | K00586 |
| BBOV_IV002930 | TA03055 | PF10_0086   | LmjF34.0110 | YDR226W   | K00939 | K00939 | K00939 | K00939 | K00939 | K00939 | BBM_III01215 | 5 |      | 5 | 1 | K00939 | K00939 |
| BBOV_IV002940 | TA03065 | PF10_0091   | LmjF30.0260 | YJL056C   |        |        |        |        |        |        | BBM_III01220 | 5 |      | 0 | 0 | Valid  |        |
| BBOV_IV002950 |         | PF10_0090   |             |           |        |        |        |        |        |        | BBM_III01225 | 2 |      | 0 | 0 | NA     |        |
| BBOV_IV002960 | TA03070 | PFD0290w    | LmjF36.5910 | YNL055C   |        |        |        |        |        |        | BBM_III01230 | 5 |      | 0 | 0 | Valid  |        |
|               |         |             |             |           |        |        |        |        |        |        | BBM_III01235 | 0 |      | 0 | 0 | NA     |        |
| BBOV_IV002970 | TA03075 | PFE0305w    | LmjF19.1390 | YER148W   | K03120 | K03120 | K03120 | K03120 | K03120 | K03120 | BBM_III01240 | 5 |      | 5 | 1 | K03120 | K03120 |
|               |         | PFE0310c    | LmjF36.1570 |           |        |        |        |        |        |        | BBM_III01245 | 2 |      | 0 | 0 | NA     |        |
| BBOV_IV002990 |         | PFL1485w    |             |           |        |        |        |        |        |        | BBM_III01250 | 2 |      | 0 | 0 | NA     |        |
| BBOV_IV003000 | TA03095 | PF10_0236   |             |           |        |        |        |        |        |        | BBM_III01255 | 3 | api  | 0 | 0 | Valid  |        |
|               |         |             |             | YOR368W   |        |        |        |        | K02830 |        | BBM_III01260 | 1 |      | 1 | 1 | NA     |        |
| BBOV_IV003030 | TA17065 | PF10_0327   | LmjF17.0710 | YMR213W   | K12860 | K12860 | K12860 | K12860 | K12860 | K12860 | BBM_III01265 | 5 |      | 5 | 1 | K12860 | K12860 |
| BBOV_IV003040 | TA17070 | PF10_0240   |             | YNL173C   |        |        |        |        |        |        | BBM_III01270 | 4 | api+ | 0 | 0 | Valid  |        |
|               |         | PF11_0301   |             |           |        |        | K00797 |        |        |        | BBM_III01275 | 1 |      | 1 | 1 | NA     |        |
| BBOV_IV003050 | TA17075 | PF10_0241   |             | YJL109C   |        |        |        |        | K14550 |        | BBM_III01280 | 4 | api+ | 1 | 1 | Valid  |        |
|               |         |             |             |           |        |        |        |        |        |        | BBM_III01285 | 0 |      | 0 | 0 | NA     |        |
|               |         |             |             |           |        |        |        |        |        |        | BBM_III01287 |   |      |   |   | Valid  |        |
| BBOV_IV003080 | TA17080 | PF11_0117   | LmjF36.6710 | YBR087W   | K10756 | K10756 | K10756 | K10756 | K10756 | K10756 | BBM_III01290 | 5 |      | 5 | 1 | K10756 | K10756 |
| BBOV_IV003100 | TA17090 | PF11_0049   | LmjF21.0800 | YCR093W   | K12604 | K12604 | K12604 | K12604 | K12604 | K12604 | BBM_III01295 | 5 |      | 5 | 1 | K12604 | K12604 |
| BBOV_IV003110 | TA17095 | PFI1480w    |             | YKL084W   |        |        |        |        |        |        | BBM_III01300 | 4 | api+ | 0 | 0 | Valid  |        |
|               |         | PFIO915w    |             |           |        |        |        |        |        |        | BBM_III01305 | 1 |      | 0 | 0 | NA     |        |
|               |         |             | LmjF35.2140 |           |        |        |        |        |        |        | BBM_III01310 | 1 |      | 0 | 0 | NA     |        |
| BBOV_IV003140 | TA16145 | PFIO935w    |             | YER060W-A |        |        |        |        |        |        | BBM_III01315 | 4 | api+ | 0 | 0 | Valid  |        |
|               |         |             |             | YBR110W   |        |        |        |        | K03842 |        | BBM_III01320 | 1 |      | 1 | 1 | NA     |        |
| BBOV_IV003160 | TA16150 | MAL13P1.329 |             | YKR088C   |        |        |        |        |        |        | BBM_III01325 | 4 | api+ | 0 | 0 | Valid  |        |
|               | TA16155 | MAL13P1.328 |             |           |        |        |        |        |        |        | BBM_III01330 | 2 |      | 0 | 0 | NA     |        |
| BBOV_IV003170 | TA16160 | PFB0210c    | LmjF24.0680 | YFL011W   |        |        | K08139 |        | K08139 |        | BBM_III01335 | 5 |      | 2 | 1 | K08139 | K08139 |
| BBOV_IV010030 | TA06690 | PFL0585w    | LmjF36.3530 | YLL039C   | K08770 | K04551 | K08770 | K08770 | K08770 | K08770 | BBM_III01340 | 5 |      | 5 | 2 | K08770 | K08770 |
| BBOV_IV003200 | TA16170 | MAL7P1.86   | LmjF36.3510 | YKL028W   |        |        |        |        | K03136 |        | BBM_III01345 | 5 |      | 1 | 1 | K03136 | K03136 |
| BBOV_IV003320 | TA16270 | MAL7P1.77   |             |           |        |        |        |        |        |        | BBM_III01350 | 3 | api  | 0 | 0 | Valid  |        |
| BBOV_IV003300 | TA16265 | MAL7P1.76   | LmjF34.3550 | YOL022C   | K14801 | K14801 |        | K14801 | K14801 | K14801 | BBM_III01355 | 5 |      | 4 | 1 | K14801 | K14801 |
|               | TA16260 | MAL13P1.242 |             |           |        |        |        |        |        |        | BBM_III01360 | 2 |      | 0 | 0 | NA     |        |
| BBOV_IV003290 | TA16255 |             |             |           | K03234 | K03234 |        |        |        |        | BBM_III01365 | 2 | piro | 2 | 1 | K03234 | K03234 |
| BBOV_IV003280 | TA16250 | PFD0285c    | LmjF24.1770 |           |        |        | K01582 | K14475 |        |        | BBM_III01370 | 4 | api+ | 2 | 2 | Valid  |        |
| BBOV_IV003270 | TA16235 | PFI0930c    |             |           | K11290 | K11290 | K11290 |        |        |        | BBM_III01375 | 3 | api  | 3 | 1 | K11290 | K11290 |
| BBOV_IV003230 | TA06060 | PFL1270w    | LmjF28.1370 |           | K07024 |        |        |        | K07024 |        | BBM_III01380 | 4 | api+ | 2 | 1 | Valid  |        |

|                                                                |
|----------------------------------------------------------------|
| E3 ubiquitin-protein ligase synoviolin [EC:6.3.2.19]           |
| small subunit ribosomal protein S25e                           |
| DNA-directed RNA polymerase III subunit C34 [EC:2.7.7.6]       |
|                                                                |
|                                                                |
|                                                                |
| apical merozoite antigen 1                                     |
|                                                                |
|                                                                |
|                                                                |
|                                                                |
| Rab family, other                                              |
|                                                                |
| diphthine synthase [EC:2.1.1.98]                               |
| adenylate kinase [EC:2.7.4.3]                                  |
|                                                                |
|                                                                |
|                                                                |
| transcription initiation factor TFIID TATA-box-binding protein |
|                                                                |
|                                                                |
| pre-mRNA-splicing factor CDC5/CEF1                             |
|                                                                |
|                                                                |
| tRNA, Leu, anticodon CAG                                       |
| replication factor C subunit 3/5                               |
| CCR4-NOT transcription complex subunit 1                       |
|                                                                |
|                                                                |
|                                                                |
| MFS transporter, SP family, sugar:H+ symporter                 |
| ubiquitin C                                                    |
| transcription initiation factor TFIIE alpha subunit            |
|                                                                |
| TSR4, pre-rRNA-processing protein TSR4                         |
|                                                                |
| elongation factor EF-2 [EC:3.6.5.3]                            |
|                                                                |
| template-activating factor I                                   |



















|               |         |             |             |         |        |        |        |        |        |  |              |   |      |   |   |        |        |
|---------------|---------|-------------|-------------|---------|--------|--------|--------|--------|--------|--|--------------|---|------|---|---|--------|--------|
| BBOV_IV010580 | TA06705 | PF14_0049   | LmjF35.2880 | YJL146W |        |        |        |        |        |  | BBM_III03485 | 5 |      | 0 | 0 | Valid  |        |
| BBOV_IV010630 | TA06720 | PF13_0305   | LmjF17.0086 | YPR080W | K03231 | K03231 | K03231 | K03231 | K03231 |  | BBM_III03490 | 5 |      | 5 | 1 | K03231 | K03231 |
| BBOV_IV010640 | TA06725 | MAL13P1.281 |             | YOL033W | K01885 | K01885 | K01885 | K01885 | K01885 |  | BBM_III03495 | 4 | api+ | 4 | 1 | K01885 | K01885 |
| BBOV_IV010650 | TA06730 | MAL13P1.279 | LmjF21.1080 | YBR160W |        | K04563 | K04563 | K00924 | K04563 |  | BBM_III03500 | 5 |      | 4 | 2 | NA     |        |
| BBOV_IV010660 |         | PFA_0250w   |             |         |        |        |        |        |        |  | BBM_III03505 | 2 |      | 0 | 0 | NA     |        |
| BBOV_IV010670 |         | MAL13P1.277 |             |         |        |        |        |        |        |  | BBM_III03510 | 2 |      | 0 | 0 | NA     |        |
| BBOV_IV010680 | TA06735 | PF13_0303   |             |         |        |        |        |        |        |  | BBM_III03515 | 3 | api  | 0 | 0 | Valid  |        |
| BBOV_IV010690 | TA06750 | MAL7P1.91   |             |         |        |        | K08282 |        |        |  | BBM_III03520 | 3 | api  | 1 | 1 | Valid  |        |
|               |         |             |             |         |        |        |        |        |        |  | BBM_III03525 | 0 |      | 0 | 0 | NA     |        |
| BBOV_IV010700 | TA06755 | PF13_0301   |             | YDR177W | K04649 | K04649 | K04649 |        | K04649 |  | BBM_III03530 | 4 | api+ | 4 | 1 | K04649 | K04649 |
| BBOV_IV010710 | TA06760 | PF13_0300   |             | YNR017W |        |        |        |        |        |  | BBM_III03535 | 4 | api+ | 0 | 0 | Valid  |        |
| BBOV_IV010720 | TA06765 |             |             |         | K12183 |        |        |        |        |  | BBM_III03540 | 2 | piro | 1 | 1 | Valid  |        |
|               | TA06770 | PF07_0036   |             |         |        |        |        |        |        |  | BBM_III03545 | 2 |      | 0 | 0 | NA     | Valid  |
|               |         |             |             |         |        |        |        |        |        |  | BBM_III03550 | 0 |      | 0 | 0 | NA     |        |
|               |         |             |             |         |        |        |        |        |        |  | BBM_III03555 | 0 |      | 0 | 0 | NA     |        |
| BBOV_IV010750 | TA06785 |             | LmjF33.0200 |         |        |        |        |        |        |  | BBM_III03560 | 3 |      | 0 | 0 | NA     |        |
|               |         |             |             |         |        |        |        |        |        |  | BBM_III03565 | 0 |      | 0 | 0 | NA     |        |
| BBOV_IV010760 | TA06790 | PF13_0310   | LmjF28.0720 | YDL153C | K14767 | K14767 | K14767 | K14767 | K14767 |  | BBM_III03570 | 5 |      | 5 | 1 | K14767 | K14767 |
| BBOV_IV010770 | TA06795 | PF11_0158   |             |         |        |        |        |        |        |  | BBM_III03575 | 3 | api  | 0 | 0 | Valid  |        |
| BBOV_IV010780 |         | PF11_0159   |             |         |        |        |        |        |        |  | BBM_III03580 | 2 |      | 0 | 0 | NA     |        |
| BBOV_IV010790 |         | PF11_0535   |             |         |        |        |        |        |        |  | BBM_III03585 | 2 |      | 0 | 0 | NA     |        |
| BBOV_IV010800 | TA06810 | PF11_0196   |             |         |        |        |        |        |        |  | BBM_III03590 | 3 | api  | 0 | 0 | Valid  |        |
| BBOV_IV010810 | TA06815 | PF11_0197   | LmjF03.0800 |         |        |        |        | K01112 |        |  | BBM_III03595 | 4 | api+ | 1 | 1 | Valid  |        |
| BBOV_IV010830 | TA06820 | PF11_0160   |             | YHR207C |        |        |        |        | K07117 |  | BBM_III03600 | 4 | api+ | 1 | 1 | Valid  |        |
| BBOV_IV010840 | TA06825 | PF11_0191   | LmjF10.0210 | YLR197W | K14564 | K14564 | K14564 | K14564 | K14564 |  | BBM_III03605 | 5 |      | 5 | 1 | K14564 | K14564 |
| BBOV_IV010870 | TA06840 | PF11_0189   |             | YOL098C |        | K06972 | K06972 |        |        |  | BBM_III03610 | 4 | api+ | 3 | 1 | K06972 | K06972 |
| BBOV_IV010860 | TA06835 | PF11_0192   | LmjF14.0140 | YOR244W |        | K00653 |        |        | K11304 |  | BBM_III03615 | 5 |      | 2 | 2 | NA     |        |
|               |         |             |             |         |        |        |        |        |        |  | BBM_III03620 | 0 |      | 0 | 0 | NA     |        |
| BBOV_IV010880 | TA06845 | PF11_0188   | LmjF33.2390 |         | K09488 | K09488 |        | K09488 |        |  | BBM_III03625 | 4 | api+ | 3 | 1 | K09488 | K09488 |
| BBOV_IV010890 | TA06850 | PF11_0187   | LmjF29.1440 | YLR170C |        |        |        |        |        |  | BBM_III03630 | 5 |      | 0 | 0 | Valid  |        |
|               |         |             | LmjF31.1540 | YJL207C |        |        |        |        |        |  | BBM_III03635 | 2 |      | 0 | 0 | NA     |        |
| BBOV_IV010910 | TA06860 | PF11_0184   | LmjF24.1420 | YMR167W | K08734 | K08734 | K08734 | K08734 | K08734 |  | BBM_III03640 | 5 |      | 5 | 1 | K08734 | K08734 |
| BBOV_IV010920 | TA06865 | PF11_0183   | LmjF25.1420 | YOR185C | K07936 | K07936 | K07936 | K07936 | K07936 |  | BBM_III03645 | 5 |      | 5 | 1 | K07936 | K07936 |
| BBOV_IV010930 | TA06870 | PFD1115c    |             |         |        |        |        |        |        |  | BBM_III03650 | 3 | api  | 0 | 0 | Valid  |        |
|               |         | MAL13P1.170 |             | YOL115W |        |        | K03514 |        | K03514 |  | BBM_III03655 | 2 |      | 2 | 1 | NA     |        |
|               | TA06875 | PF08_0009   |             |         |        |        | K03239 |        |        |  | BBM_III03660 | 2 |      | 1 | 1 | NA     |        |
|               |         | PFF1410c    | LmjF30.3110 |         |        |        |        | K01611 |        |  | BBM_III03665 | 2 |      | 1 | 1 | NA     |        |
| BBOV_IV010950 | TA06885 | PF11_0181   | LmjF32.0950 | YPL097W | K01866 | K01866 | K01866 |        | K01866 |  | BBM_III03670 | 5 |      | 4 | 1 | K01866 | K01866 |
| BBOV_IV010960 | TA06890 | PFD1110w    |             |         |        |        |        |        |        |  | BBM_III03675 | 3 | api  | 0 | 0 | Valid  |        |
|               |         | PFA_0020w   | LmjF33.0790 |         |        |        |        |        |        |  | BBM_III03680 | 2 |      | 0 | 0 | NA     |        |
| BBOV_IV010980 | TA06910 | PFD1090c    |             |         | K12403 | K12403 | K12403 |        |        |  | BBM_III03685 | 3 | api  | 3 | 1 | K12403 | K12403 |
|               |         |             |             |         |        |        |        |        |        |  | BBM_III03690 | 0 |      | 0 | 0 | NA     |        |
| BBOV_IV010990 | TA06920 | PFD1070w    | LmjF28.1530 | YDR021W | K13025 | K13025 | K13025 | K13025 | K13025 |  | BBM_III03695 | 5 |      | 5 | 1 | K13025 | K13025 |
| BBOV_IV011000 | TA06925 | MAL13P1.311 |             |         |        |        |        |        |        |  | BBM_III03700 | 3 | api  | 0 | 0 | Valid  |        |
|               |         | PF11295c    |             |         |        |        |        |        |        |  | BBM_III03705 | 1 |      | 0 | 0 | NA     |        |
|               |         |             |             |         |        |        |        |        |        |  | BBM_III03710 | 0 |      | 0 | 0 | NA     |        |
| BBOV_IV011040 | TA06950 | PF13_0149   | LmjF30.0950 | YEL056W | K10752 |        |        |        | K10752 |  | BBM_III03715 | 5 |      | 2 | 1 | K10752 | K10752 |
| BBOV_IV011050 | TA06960 | MAL13P1.148 | LmjF32.3870 | YOR326W |        |        | K01553 |        |        |  | BBM_III03720 | 5 |      | 1 | 1 | K01553 | K01553 |
|               |         |             |             |         |        |        |        |        |        |  | BBM_III03722 |   |      |   |   | Valid  |        |
| BBOV_IV011070 | TA06965 | PF10_0132   | LmjF30.2950 | YPL268W |        | K01116 | K01116 | K05857 | K01116 |  | BBM_III03725 | 5 |      | 4 | 2 | NA     |        |
| BBOV_IV011100 | TA06985 | PF10_0243   |             | YIL144W |        |        |        |        | K11547 |  | BBM_III03730 | 4 | api+ | 1 | 1 | Valid  |        |
| BBOV_IV011120 | TA06990 | PF08_0127   | LmjF32.0150 | YML093W |        | K14567 |        | K14567 |        |  | BBM_III03735 | 5 |      | 3 | 1 | K14567 | K14567 |
| BBOV_IV011130 | TA06995 | PF10_0143   |             | YDR448W | K11314 | K11314 | K11314 |        | K11314 |  | BBM_III03740 | 4 | api+ | 4 | 1 | K11314 | K11314 |
|               |         |             |             | YKR004C |        |        |        |        |        |  | BBM_III03745 | 1 |      | 0 | 0 | NA     |        |

|  |  |  |  |  |  |  |  |  |  |  |  |  |  |  |  |  |  |                                                                 |
|--|--|--|--|--|--|--|--|--|--|--|--|--|--|--|--|--|--|-----------------------------------------------------------------|
|  |  |  |  |  |  |  |  |  |  |  |  |  |  |  |  |  |  | elongation factor EF-1 alpha subunit [EC:3.6.5.3]               |
|  |  |  |  |  |  |  |  |  |  |  |  |  |  |  |  |  |  | glutamyl-tRNA synthetase [EC:6.1.1.17]                          |
|  |  |  |  |  |  |  |  |  |  |  |  |  |  |  |  |  |  |                                                                 |
|  |  |  |  |  |  |  |  |  |  |  |  |  |  |  |  |  |  |                                                                 |
|  |  |  |  |  |  |  |  |  |  |  |  |  |  |  |  |  |  |                                                                 |
|  |  |  |  |  |  |  |  |  |  |  |  |  |  |  |  |  |  |                                                                 |
|  |  |  |  |  |  |  |  |  |  |  |  |  |  |  |  |  |  |                                                                 |
|  |  |  |  |  |  |  |  |  |  |  |  |  |  |  |  |  |  | ubiquitin-conjugating enzyme (huntingtin interacting protein 2) |
|  |  |  |  |  |  |  |  |  |  |  |  |  |  |  |  |  |  |                                                                 |
|  |  |  |  |  |  |  |  |  |  |  |  |  |  |  |  |  |  | glutaredoxin-like protein / Cg6 protein                         |
|  |  |  |  |  |  |  |  |  |  |  |  |  |  |  |  |  |  |                                                                 |
|  |  |  |  |  |  |  |  |  |  |  |  |  |  |  |  |  |  |                                                                 |
|  |  |  |  |  |  |  |  |  |  |  |  |  |  |  |  |  |  |                                                                 |
|  |  |  |  |  |  |  |  |  |  |  |  |  |  |  |  |  |  | UTP3, SAS10, U3 small nucleolar RNA-associated protein 3        |
|  |  |  |  |  |  |  |  |  |  |  |  |  |  |  |  |  |  |                                                                 |
|  |  |  |  |  |  |  |  |  |  |  |  |  |  |  |  |  |  |                                                                 |
|  |  |  |  |  |  |  |  |  |  |  |  |  |  |  |  |  |  |                                                                 |
|  |  |  |  |  |  |  |  |  |  |  |  |  |  |  |  |  |  |                                                                 |
|  |  |  |  |  |  |  |  |  |  |  |  |  |  |  |  |  |  | NOP56, nucleolar protein 56                                     |
|  |  |  |  |  |  |  |  |  |  |  |  |  |  |  |  |  |  |                                                                 |
|  |  |  |  |  |  |  |  |  |  |  |  |  |  |  |  |  |  |                                                                 |
|  |  |  |  |  |  |  |  |  |  |  |  |  |  |  |  |  |  | TNF receptor-associated protein 1                               |
|  |  |  |  |  |  |  |  |  |  |  |  |  |  |  |  |  |  |                                                                 |
|  |  |  |  |  |  |  |  |  |  |  |  |  |  |  |  |  |  |                                                                 |
|  |  |  |  |  |  |  |  |  |  |  |  |  |  |  |  |  |  |                                                                 |
|  |  |  |  |  |  |  |  |  |  |  |  |  |  |  |  |  |  |                                                                 |
|  |  |  |  |  |  |  |  |  |  |  |  |  |  |  |  |  |  |                                                                 |
|  |  |  |  |  |  |  |  |  |  |  |  |  |  |  |  |  |  |                                                                 |
|  |  |  |  |  |  |  |  |  |  |  |  |  |  |  |  |  |  |                                                                 |
|  |  |  |  |  |  |  |  |  |  |  |  |  |  |  |  |  |  |                                                                 |
|  |  |  |  |  |  |  |  |  |  |  |  |  |  |  |  |  |  | tyrosyl-tRNA synthetase [EC:6.1.1.1]                            |
|  |  |  |  |  |  |  |  |  |  |  |  |  |  |  |  |  |  |                                                                 |
|  |  |  |  |  |  |  |  |  |  |  |  |  |  |  |  |  |  |                                                                 |
|  |  |  |  |  |  |  |  |  |  |  |  |  |  |  |  |  |  | AP-4 complex subunit sigma-1                                    |
|  |  |  |  |  |  |  |  |  |  |  |  |  |  |  |  |  |  |                                                                 |
|  |  |  |  |  |  |  |  |  |  |  |  |  |  |  |  |  |  | EIF4A3, FAL1, ATP-dependent RNA helicase [EC:3.6.4.13]          |
|  |  |  |  |  |  |  |  |  |  |  |  |  |  |  |  |  |  |                                                                 |
|  |  |  |  |  |  |  |  |  |  |  |  |  |  |  |  |  |  |                                                                 |
|  |  |  |  |  |  |  |  |  |  |  |  |  |  |  |  |  |  |                                                                 |
|  |  |  |  |  |  |  |  |  |  |  |  |  |  |  |  |  |  |                                                                 |
|  |  |  |  |  |  |  |  |  |  |  |  |  |  |  |  |  |  | histone-binding protein RBBP4                                   |
|  |  |  |  |  |  |  |  |  |  |  |  |  |  |  |  |  |  | myosin ATPase [EC:3.6.4.1]                                      |
|  |  |  |  |  |  |  |  |  |  |  |  |  |  |  |  |  |  | tRNA, Gly, antodon CCC                                          |
|  |  |  |  |  |  |  |  |  |  |  |  |  |  |  |  |  |  |                                                                 |
|  |  |  |  |  |  |  |  |  |  |  |  |  |  |  |  |  |  |                                                                 |
|  |  |  |  |  |  |  |  |  |  |  |  |  |  |  |  |  |  | UTP14, U3 small nucleolar RNA-associated protein 14             |
|  |  |  |  |  |  |  |  |  |  |  |  |  |  |  |  |  |  | transcriptional adapter 2-alpha                                 |

|                |         |             |             |           |        |        |        |        |        |              |   |      |   |   |        |        |                                                                    |
|----------------|---------|-------------|-------------|-----------|--------|--------|--------|--------|--------|--------------|---|------|---|---|--------|--------|--------------------------------------------------------------------|
| BBOV_IV010230  | TA07000 | PF10_0141   |             |           | K02202 | K02202 | K02202 |        |        | BBM_III03750 | 3 | api  | 3 | 1 | K02202 | K02202 | cyclin-dependent kinase 7 [EC:2.7.11.22]                           |
| BBOV_IV010250  | TA07005 | PF10_0140   |             | YGL227W   |        |        |        |        |        | BBM_III03755 | 4 | api+ | 0 | 0 | Valid  |        |                                                                    |
| BBOV_IV010260  | TA07010 | PF10_0324   |             |           |        |        |        |        |        | BBM_III03760 | 3 | api  | 0 | 0 | Valid  |        |                                                                    |
| BBOV_IV010270  | TA07015 | PF10_0328   |             | YLR399C   |        |        |        |        | K11684 | BBM_III03765 | 4 | api+ | 1 | 1 | Valid  |        |                                                                    |
| BBOV_IV009850  | TA07020 | PF10_0169   | LmjF36.1960 | YFL045C   | K01840 | K01840 | K01840 | K01840 | K01840 | BBM_III03770 | 5 |      | 5 | 1 | K01840 | K01840 | phosphomannomutase [EC:5.4.2.8]                                    |
|                | TA05660 | PF14_0689   |             | YGR172C   |        |        |        |        |        | BBM_III03772 | 3 |      | 0 | 0 | NA     |        |                                                                    |
| BBOV_IV009810  | TA05665 | PF10625c    | LmjF36.5780 | YOL144W   | K03256 |        |        |        | K14836 | BBM_III03780 | 5 |      | 2 | 2 | NA     |        |                                                                    |
|                | TA05715 | PF11_0059   | LmjF15.0870 |           |        |        |        |        |        | BBM_III03785 | 3 |      | 0 | 0 | NA     |        |                                                                    |
| BBOV_IV009720  | TA05710 | PF11_0108   | LmjF32.2490 | YBR055C   | K12855 | K12855 | K12855 |        | K12855 | BBM_III03790 | 5 |      | 4 | 1 | K12855 | K12855 | pre-mRNA-processing factor 6                                       |
| BBOV_IV009730  | TA05700 |             |             |           |        |        |        |        |        | BBM_III03795 | 2 | piro | 0 | 0 | Valid  |        |                                                                    |
| BBOV_IV009740  | TA05695 | PF11_0112   | LmjF21.0470 | YJL154C   |        |        |        |        |        | BBM_III03800 | 5 |      | 0 | 0 | Valid  |        |                                                                    |
| BBOV_IV009800  | TA05670 | PF11_0113   | LmjF27.2220 | YNL185C   |        |        |        |        |        | BBM_III03805 | 5 |      | 0 | 0 | Valid  |        |                                                                    |
| BBOV_IV009790  | TA05675 | PF11_0114   |             |           |        |        |        |        |        | BBM_III03810 | 3 | api  | 0 | 0 | Valid  |        |                                                                    |
| BBOV_IV009780  | TA05680 | PF11_0115   |             |           | K13118 | K13118 |        |        |        | BBM_III03815 | 3 | api  | 2 | 1 | Valid  |        |                                                                    |
| BBOV_IV009760  | TA05690 | PF14_0253   | LmjF26.1230 | YLR413W   |        |        |        |        |        | BBM_III03820 | 5 |      | 0 | 0 | Valid  |        |                                                                    |
|                |         |             |             |           |        |        |        |        |        | BBM_III03825 | 0 |      | 0 | 0 | NA     |        |                                                                    |
| BBOV_III004210 |         |             |             |           |        |        |        |        |        | BBM_III03830 | 1 |      | 0 | 0 | NA     |        |                                                                    |
| BBOV_IV009690  | TA05720 | PF13_0358   | LmjF24.0720 | YEL020W-A |        |        |        |        |        | BBM_III03835 | 5 |      | 0 | 0 | Valid  |        |                                                                    |
| BBOV_IV009680  | TA05725 | PF13_0357   |             |           |        |        |        |        |        | BBM_III03840 | 3 | api  | 0 | 0 | Valid  |        |                                                                    |
| BBOV_IV009670  | TA05730 |             | LmjF36.6920 |           | K14775 |        |        |        |        | BBM_III03845 | 3 |      | 1 | 1 | NA     |        |                                                                    |
| BBOV_IV009660  | TA05735 | PF10_0329   |             |           |        | K01386 | K01386 |        |        | BBM_III03850 | 3 | api  | 2 | 1 | Valid  |        |                                                                    |
| BBOV_IV009650  | TA05740 | PF10_0330   | LmjF32.0700 | YEL012W   | K10576 | K10576 | K10576 | K10576 | K10576 | BBM_III03855 | 5 |      | 5 | 1 | K10576 | K10576 | ubiquitin-conjugating enzyme E2 H [EC:6.3.2.19]                    |
| BBOV_IV009640  | TA05745 | PF08_0126   | LmjF24.0760 | YGL163C   | K10875 | K10875 | K10875 | K10877 | K10875 | BBM_III03860 | 5 |      | 5 | 2 | K10875 | K10875 | DNA repair and recombination protein RAD54 and RAD54-like protein  |
| BBOV_IV009630  | TA05750 | PF14_0411   |             | YER146W   | K12624 | K12624 | K12624 |        | K12624 | BBM_III03865 | 4 | api+ | 4 | 1 | K12624 | K12624 | U6 snRNA-associated 5m-like protein LSm5                           |
|                |         |             | LmjF21.1710 | YNR063W   |        |        |        |        | K02267 | BBM_III03870 | 2 |      | 1 | 1 | NA     |        |                                                                    |
| BBOV_IV009610  | TA05765 | PF08_0020   |             | YDL190C   |        |        |        |        | K10597 | BBM_III03875 | 4 | api+ | 1 | 1 | Valid  |        |                                                                    |
| BBOV_IV009600  | TA05785 | PFE0465c    |             |           | K02999 | K02999 | K02999 |        |        | BBM_III03880 | 3 | api  | 3 | 1 | K02999 | K02999 | DNA-directed RNA polymerase I subunit A1 [EC:2.7.7.6]              |
| BBOV_IV009590  | TA05790 | PFL2140c    | LmjF32.1230 | YDL226C   | K12492 |        |        | K12492 | K12492 | BBM_III03885 | 5 |      | 3 | 1 | K12492 | K12492 | ADP-ribosylation factor GTPase-activating protein 1                |
| BBOV_IV009580  |         | PF14_0415   | LmjF22.1530 | YDR1296C  | K00859 |        | K00859 |        | K00859 | BBM_III03890 | 4 |      | 4 | 1 | K00859 | K00859 | dephospho-CoA kinase [EC:2.7.1.24]                                 |
| BBOV_IV009570  | TA05795 | PF14_0416   | LmjF23.0280 | YLR323C   | K13127 | K13127 | K13127 |        | K13127 | BBM_III03895 | 5 |      | 4 | 1 | K13127 | K13127 | RING finger protein 113A                                           |
| BBOV_IV009560  | TA05800 | PF14_0652   | LmjF32.1740 |           |        |        |        |        |        | BBM_III03900 | 4 | api+ | 0 | 0 | Valid  |        |                                                                    |
| BBOV_IV009550  | TA05805 | PFE0505w    |             |           | K12736 | K12736 | K12736 |        |        | BBM_III03905 | 3 | api  | 3 | 1 | K12736 | K12736 | peptidylprolyl isomerase domain and WD repeat-containing protein 1 |
| BBOV_IV009540  | TA05810 | PFE0470w    |             |           |        |        |        |        |        | BBM_III03910 | 3 | api  | 0 | 0 | Valid  |        |                                                                    |
|                | TA05825 |             |             |           |        | K01893 |        |        |        | BBM_III03915 | 1 |      | 1 | 1 | NA     |        |                                                                    |
| BBOV_IV009520  | TA05835 | PFE0485w    | LmjF34.3590 | YNL267W   | K00888 | K00888 | K00888 | K00888 | K00888 | BBM_III03920 | 5 |      | 5 | 1 | K00888 | K00888 | phosphatidylinositol 4-kinase [EC:2.7.1.67]                        |
| BBOV_IV009510  | TA05840 | PFE0490w    |             |           |        |        |        |        |        | BBM_III03925 | 3 | api  | 0 | 0 | Valid  |        |                                                                    |
| BBOV_IV009500  | TA05845 |             |             |           | K14806 | K14806 |        |        |        | BBM_III03930 | 2 | piro | 2 | 1 | K14806 | K14806 | DDX31, DBP7, ATP-dependent RNA helicase DDX31/DBP7 [EC:3.6.4.13]   |
| BBOV_IV009490  | TA05850 | PF14_0706   |             |           |        |        |        |        |        | BBM_III03935 | 3 | api  | 0 | 0 | Valid  |        |                                                                    |
| BBOV_IV009470  | TA05855 |             |             |           |        |        |        |        |        | BBM_III03940 | 2 | piro | 0 | 0 | Valid  |        |                                                                    |
| BBOV_IV009460  | TA05860 |             | LmjF36.4100 |           |        |        |        |        |        | BBM_III03945 | 3 |      | 0 | 0 | NA     |        |                                                                    |
| BBOV_IV009450  | TA05865 | MAL7P1.157a |             | YNL286W   | K13093 | K13093 |        |        | K13093 | BBM_III03950 | 4 | api+ | 3 | 1 | K13093 | K13093 | HIV Tat-specific factor 1                                          |
| BBOV_IV009440  |         | MAL7P1.158  |             | YKL054C   | K03109 |        | K03109 |        |        | BBM_III03955 | 3 |      | 2 | 1 | NA     |        |                                                                    |
| BBOV_IV009430  | TA05875 | PF07_0121   | LmjF26.0970 | YHR170W   | K07562 | K07562 | K07562 | K07562 | K07562 | BBM_III03960 | 5 |      | 5 | 1 | K07562 | K07562 | NMD3, nonsense-mediated mRNA decay protein 3                       |
| BBOV_IV009420  | TA05880 | PF07_0122   | LmjF20.1670 | YOL077C   | K14820 | K14820 | K14820 | K14820 | K14820 | BBM_III03965 | 5 |      | 5 | 1 | K14820 | K14820 | BRX1, BRX1, ribosome biogenesis protein BRX1                       |
| BBOV_IV009410  | TA05885 | PF10415c    | LmjF02.0380 | YBR061C   | K02427 | K02427 | K02427 | K14864 | K14864 | BBM_III03970 | 5 |      | 5 | 2 | K02427 | K02427 | rlmE, rrmJ, ftsJ, ribosomal RNA large subunit methyltransferase E  |
| BBOV_IV009400  | TA05890 | MAL7P1.164  |             |           |        |        |        |        |        | BBM_III03975 | 3 | api  | 0 | 0 | Valid  |        |                                                                    |
| BBOV_IV009370  | TA05905 | MAL7P1.155  |             | YDR255C   |        |        |        |        |        | BBM_III03980 | 4 | api+ | 0 | 0 | Valid  |        |                                                                    |
| BBOV_IV009360  | TA05910 | PF14_0479   | LmjF30.1230 | YDR266C   |        |        |        |        |        | BBM_III03985 | 5 |      | 0 | 0 | Valid  |        |                                                                    |
| BBOV_IV009350  | TA05915 | PF14_0478   | LmjF34.2670 | YPR048W   |        |        |        |        | K00327 | BBM_III03990 | 5 |      | 1 | 1 | K00327 | K00327 | NADPH-ferrihemoprotein reductase [EC:1.6.2.4]                      |
| BBOV_IV009340  |         |             |             |           |        |        |        |        |        | BBM_III03995 | 1 |      | 0 | 0 | NA     |        |                                                                    |
| BBOV_IV009320  | TA05930 | PF14_0480   |             | YIL105C   |        |        |        |        |        | BBM_III04000 | 4 | api+ | 0 | 0 | Valid  |        |                                                                    |
| BBOV_IV009290  | TA05950 | PF10_0081   | LmjF13.1090 | YDL007W   | K03062 | K03062 | K03062 | K03062 | K03062 | BBM_III04005 | 5 |      | 5 | 1 | K03062 | K03062 | 26S proteasome regulatory subunit T2                               |
| BBOV_IV009300  | TA05940 |             | LmjF28.1410 | YMR065W   |        |        |        |        |        | BBM_III04010 | 4 |      | 0 | 0 | NA     |        |                                                                    |
| BBOV_IV009310  | TA05935 | PF11_0074   |             |           |        | K12618 | K12618 |        |        | BBM_III04015 | 3 | api  | 2 | 1 | Valid  |        |                                                                    |







|                |         |             |             |           |        |        |        |        |        |              |   |      |   |   |        |        |                                                                     |
|----------------|---------|-------------|-------------|-----------|--------|--------|--------|--------|--------|--------------|---|------|---|---|--------|--------|---------------------------------------------------------------------|
| BBOV_IV002730  | TA04200 | PF07_0115   | LmjF07.1050 | YEL031W   | K14950 | K14950 | K14950 | K14950 | K14950 | BBM_III04820 | 5 |      | 5 | 1 | K14950 | K14950 | ATP13A1                                                             |
| BBOV_IV003360  | TA03235 | PFC0805w    | LmjF31.2610 | YDL140C   | K03006 | K03006 | K03006 | K03006 | K03006 | BBM_III04825 | 5 |      | 5 | 1 | K03006 | K03006 | DNA-directed RNA polymerase II subunit A [EC:2.7.7.6]               |
|                |         |             |             |           |        |        |        |        |        | BBM_III04830 | 0 |      | 0 | 0 |        |        |                                                                     |
|                |         | PF08_0141   |             | YLR017W   |        |        | K13850 |        | K00772 | BBM_III04840 | 2 |      | 2 | 2 | NA     | Valid  | BMN family (2)                                                      |
| BBOV_IV001400  |         |             | LmjF35.0950 | YCR043C   |        |        |        |        |        | BBM_III04845 | 2 |      | 0 | 0 | NA     | Valid  | Tpr related protein, putative                                       |
|                |         |             |             |           |        |        |        |        |        | BBM_III04850 | 1 |      | 0 | 0 | NA     | Valid  | BMN family (1)                                                      |
|                |         |             |             | YDR310C   |        |        |        |        | K12779 | BBM_III04855 | 1 |      | 1 | 1 | NA     | Valid  | BMN family (2)                                                      |
| BBOV_IV006020  |         | PFC0395w    | LmjF29.1490 | YGR124W   |        |        |        | K01953 | K01953 | BBM_III04860 | 4 |      | 2 | 1 | NA     | K01953 | asparagine synthase (glutamine-hydrolysing) [EC:6.3.5.4]            |
|                |         |             |             |           |        |        |        |        |        | BBM_III04865 | 0 |      | 0 | 0 | NA     |        |                                                                     |
| BBOV_III011790 | TA17020 | PF13_0229   | LmjF18.0510 | YLR304C   | K01681 | K01681 | K01681 | K01681 | K01681 | BBM_III04870 | 5 |      | 5 | 1 | K01681 | K01681 | aconitate hydratase 1 [EC:4.2.1.3]                                  |
|                |         |             | LmjF34.1080 |           |        |        |        |        |        | BBM_III04875 | 1 |      | 0 | 0 | NA     |        |                                                                     |
| BBOV_III004640 | TA15200 | MAL13P1.209 | LmjF36.4510 | YOL120C   | K02883 | K02883 | K02883 | K02883 | K02883 | BBM_III04880 | 5 |      | 5 | 1 | K02883 | K02883 | large subunit ribosomal protein L18e                                |
| BBOV_III004650 | TA13470 | PF13_0227   | LmjF35.0700 | YEL051W   | K02149 | K02149 | K02149 | K02149 | K02149 | BBM_III04885 | 5 |      | 5 | 1 | K02149 | K02149 | V-type H <sup>+</sup> -transporting ATPase subunit D [EC:3.6.3.14]  |
| BBOV_III004660 | TA13460 | PF13_0228   | LmjF21.1780 | YPL090C   | K02991 | K02991 | K02991 | K02991 | K02991 | BBM_III04890 | 5 |      | 5 | 1 | K02991 | K02991 | small subunit ribosomal protein S6e                                 |
| BBOV_III004680 | TA13450 | PF14_0509   |             |           |        |        |        |        |        | BBM_III04895 | 3 | api  | 0 | 0 | Valid  |        |                                                                     |
| BBOV_III011830 |         | PF14_0506a  | LmjF35.2510 | YER074W-A |        |        |        |        |        | BBM_III04900 | 4 |      | 0 | 0 | NA     |        |                                                                     |
|                |         |             |             |           |        |        |        |        |        | BBM_III04905 | 0 |      | 0 | 0 | NA     |        |                                                                     |
| BBOV_III011110 | TA11705 | PF13_0290   |             |           |        |        |        |        |        | BBM_III04910 | 3 | api  | 0 | 0 | Valid  |        |                                                                     |
| BBOV_III006180 | TA16940 |             | LmjF35.2900 |           |        |        |        |        |        | BBM_III04915 | 3 |      | 0 | 0 | NA     |        |                                                                     |
| BBOV_III004630 | TA15210 | PF13_0224   | LmjF32.0880 | YOR312C   | K02882 | K02882 | K02882 | K02882 | K02882 | BBM_III04920 | 5 |      | 5 | 1 | K02882 | K02882 | large subunit ribosomal protein L18Ae                               |
|                |         |             |             |           |        |        |        |        |        | BBM_III04925 | 1 |      | 0 | 0 | NA     |        |                                                                     |
| BBOV_III004690 | TA13440 | PF13_0167   |             | YOR123C   |        |        |        |        |        | BBM_III04930 | 4 | api+ | 0 | 0 | Valid  |        |                                                                     |
|                |         |             |             |           |        |        |        |        |        | BBM_III04935 | 0 |      | 0 | 0 | NA     |        |                                                                     |
| BBOV_IV003940  | TA16945 |             | LmjF09.1420 | YDR026C   |        |        |        |        | K09424 | BBM_III04940 | 4 |      | 1 | 1 | NA     |        |                                                                     |
| BBOV_IV003950  |         |             |             |           |        |        |        |        |        | BBM_III04945 | 1 |      | 0 | 0 | NA     |        |                                                                     |
|                |         |             |             |           |        |        |        |        |        | BBM_III04950 | 1 |      | 0 | 0 | NA     |        |                                                                     |
| BBOV_IV003930  | TA16950 |             |             |           |        |        |        |        |        | BBM_III04955 | 2 | piro | 0 | 0 | Valid  |        |                                                                     |
| BBOV_III011840 | TA17035 | PF13_0257   | LmjF30.3240 | YGL245W   | K01885 | K01885 | K01885 | K01885 | K01885 | BBM_III04960 | 5 |      | 5 | 1 | K01885 | K01885 | glutamyl-tRNA synthetase [EC:6.1.1.17]                              |
| BBOV_IV001510  |         | PFB0467w    |             |           |        |        |        |        |        | BBM_III04965 | 2 |      | 0 | 0 | NA     |        |                                                                     |
| BBOV_IV001500  | TA20185 |             | LmjF28.2650 | YIL085C   |        |        |        |        | K03854 | BBM_III04970 | 4 |      | 1 | 1 | NA     |        |                                                                     |
|                |         |             | LmjF31.3170 |           |        |        |        |        |        | BBM_III04975 | 1 |      | 0 | 0 | NA     |        |                                                                     |
| BBOV_IV001490  | TA20195 | PF14_0468   |             |           |        |        |        |        |        | BBM_III04980 | 3 | api  | 0 | 0 | Valid  |        |                                                                     |
| BBOV_IV001480  | TA20200 | PF07_0112   | LmjF21.1830 | YGR253C   | K02729 | K02729 | K02729 | K02729 | K02729 | BBM_III04985 | 5 |      | 5 | 1 | K02729 | K02729 | 20S proteasome subunit alpha 5 [EC:3.4.25.1]                        |
|                |         |             |             |           |        |        |        |        |        | BBM_III04990 | 1 |      | 0 | 0 | NA     |        |                                                                     |
| BBOV_IV002820  | TA04140 | PF14_0474   |             | YER039C-A |        |        |        |        |        | BBM_III04995 | 4 | api+ | 0 | 0 | Valid  |        |                                                                     |
| BBOV_IV002810  | TA04155 | PFB0420w    |             |           | K01770 | K01770 | K01770 |        |        | BBM_III05000 | 3 | api  | 3 | 1 | K01770 | K01770 | 2-C-methyl-D-erythritol 2,4-cyclodiphosphate synthase [EC:4.6.1.12] |
|                |         |             | LmjF22.1700 | YML054C-A |        |        |        |        |        | BBM_III05005 | 3 |      | 0 | 0 | NA     |        |                                                                     |
| BBOV_III009830 | TA16865 |             | LmjF21.1690 |           |        |        |        |        |        | BBM_III05010 | 3 |      | 0 | 0 | NA     |        |                                                                     |
| BBOV_III009840 | TA10750 |             |             | YOR249C   |        |        |        |        | K03352 | BBM_III05015 | 3 |      | 1 | 1 | NA     |        |                                                                     |
| BBOV_III009850 | TA10745 |             |             |           |        |        |        |        |        | BBM_III05020 | 2 | piro | 0 | 0 | Valid  |        |                                                                     |
| BBOV_III009870 | TA10585 |             |             |           |        |        |        |        |        | BBM_III05025 | 2 | piro | 0 | 0 | Valid  |        |                                                                     |
|                |         |             |             |           |        |        |        |        |        | BBM_III05030 | 1 |      | 0 | 0 | NA     |        |                                                                     |
| BBOV_III009920 | TA10195 | PF13_0341   | LmjF18.0780 | YBR154C   | K03013 | K03013 | K03013 | K03013 | K03013 | BBM_III05035 | 5 |      | 5 | 1 | K03013 | K03013 | DNA-directed RNA polymerase II subunit E                            |
| BBOV_III003870 | TA15060 | PF10325c    | LmjF09.0720 | YLR136C   |        |        |        |        | K14404 | BBM_III05040 | 5 |      | 1 | 1 | K14404 | K14404 | cleavage and polyadenylation specificity factor subunit 4           |
| BBOV_III009890 | TA10310 | MAL8P1.95   | LmjF07.0980 | YOR134W   |        |        |        |        | K11276 | BBM_III05045 | 5 |      | 1 | 1 | K11276 | K11276 | nucleophosmin 1                                                     |
| BBOV_III009900 | TA10305 | MAL13P1.327 |             |           |        |        |        |        |        | BBM_III05050 | 3 | api  | 0 | 0 | Valid  |        |                                                                     |
| BBOV_III009910 | TA10200 | PF13_0342   |             |           |        |        |        |        |        | BBM_III05055 | 3 | api  | 0 | 0 | Valid  |        |                                                                     |
| BBOV_III009880 | TA10365 | PF08_0087   | LmjF30.1120 | YNL189W   |        |        |        |        |        | BBM_III05060 | 5 |      | 0 | 0 | Valid  |        |                                                                     |
| BBOV_IV000120  | TA19335 | PF13_0340   | LmjF22.1580 | YDR280W   | K03678 | K03678 | K01149 | K03678 | K03678 | BBM_III05065 | 5 |      | 5 | 2 | K03678 | K03678 | exosome complex component RRP45                                     |
|                |         |             |             |           |        |        |        |        |        | BBM_III05070 | 0 |      | 0 | 0 | NA     |        |                                                                     |
| BBOV_IV000130  | TA15960 | MAL13P1.324 | LmjF31.2880 | YPL088W   |        |        |        |        |        | BBM_III05075 | 5 |      | 0 | 0 | Valid  |        |                                                                     |
|                |         |             | LmjF21.0825 | YIL149C   |        |        |        |        | K09291 | BBM_III05080 | 3 |      | 1 | 1 | NA     |        |                                                                     |
|                |         |             | LmjF32.0140 |           |        |        |        |        |        | BBM_III05085 | 1 |      | 0 | 0 | NA     |        |                                                                     |
|                |         |             |             | YPL113C   |        |        |        |        |        | BBM_III05090 | 1 |      | 0 | 0 | NA     |        |                                                                     |



|                |         |             |             |           |        |        |        |        |        |              |   |      |   |   |        |        |                                                                  |
|----------------|---------|-------------|-------------|-----------|--------|--------|--------|--------|--------|--------------|---|------|---|---|--------|--------|------------------------------------------------------------------|
| BBOV_IV002560  | TA04320 | MAL13P1.322 |             | YKR086W   | K12815 | K12815 | K12815 |        | K12815 | BBM_III05095 | 4 | api+ | 4 | 1 | K12815 | K12815 | pre-mRNA-splicing factor ATP-dependent RNA helicase PRP16        |
| BBOV_IV002550  | TA04325 | MAL13P1.346 | LmjF08.0140 | YPL022W   | K10848 | K10848 | K10848 | K10848 | K10848 | BBM_III05100 | 5 |      | 5 | 1 | K10848 | K10848 | DNA excision repair protein ERCC-4 [EC:3.1.-.-]                  |
| BBOV_IV002540  | TA04330 | MAL13P1.347 |             |           |        |        |        |        |        | BBM_III05105 | 3 | api  | 0 | 0 | Valid  |        |                                                                  |
| BBOV_IV002530  | TA04335 | MAL13P1.348 | LmjF33.0960 | YPL221W   |        | K05289 |        | K00763 |        | BBM_III05110 | 5 |      | 2 | 2 | NA     |        |                                                                  |
|                |         |             |             |           |        |        |        |        |        | BBM_III05115 | 0 |      | 0 | 0 | NA     |        |                                                                  |
| BBOV_IV008980  | TA06175 | PF0700c     | LmjF29.1340 | YOL123W   | K14411 |        |        |        | K14411 | BBM_III05120 | 5 |      | 2 | 1 | K14411 | K14411 | RNA-binding protein Musashi                                      |
|                |         |             |             | YMR169C   |        |        |        |        | K00129 | BBM_III05125 | 1 |      | 1 | 1 | NA     |        |                                                                  |
|                | TA04220 |             |             |           |        |        |        |        |        | BBM_III05130 | 1 |      | 0 | 0 | NA     |        |                                                                  |
| BBOV_IV002700  | TA04225 | PF14_0556   |             |           |        |        |        |        |        | BBM_III05135 | 3 | api  | 0 | 0 | Valid  |        |                                                                  |
| BBOV_IV002520  | TA04340 | PF11070c    | LmjF27.0450 | YHR088W   | K14846 | K14846 | K14846 | K14846 | K14846 | BBM_III05140 | 5 |      | 5 | 1 | K14846 | K14846 | RPF1, ribosome production factor 1                               |
|                | TA04345 |             |             |           |        |        |        |        |        | BBM_III05145 | 1 |      | 0 | 0 | NA     |        |                                                                  |
| BBOV_IV002390  | TA04410 | PF11085w    |             |           |        |        |        |        |        | BBM_III05150 | 3 | api  | 0 | 0 | Valid  |        |                                                                  |
| BBOV_I002290   | TA04310 | PF11335c    | LmjF30.0750 |           | K03152 | K03152 |        | K03152 |        | BBM_III05155 | 4 | api+ | 3 | 1 | K03152 | K03152 | 4-methyl-5(b-hydroxyethyl)-thiazole monophosphate biosynthesis   |
|                |         |             |             |           |        |        |        |        |        | BBM_III05160 | 0 |      | 0 | 0 | NA     |        |                                                                  |
| BBOV_IV002410  | TA04400 | PF11330c    |             | YDL217C   |        |        |        |        |        | BBM_III05165 | 4 | api+ | 0 | 0 | Valid  |        |                                                                  |
| BBOV_IV002400  | TA04405 | PF0350w     | LmjF16.0960 | YDR316W   |        |        |        |        |        | BBM_III05170 | 5 |      | 0 | 0 | Valid  |        |                                                                  |
| BBOV_IV002630  | TA04275 | PF13_0262   | LmjF15.0230 | YDR037W   | K04567 | K04567 | K04567 | K04567 | K04567 | BBM_III05175 | 5 |      | 5 | 1 | K04567 | K04567 | lysyl-tRNA synthetase, class II [EC:6.1.1.6]                     |
| BBOV_I002720   | TA19560 | PF14_0491   | LmjF25.0040 |           | K12871 |        |        |        |        | BBM_III05180 | 4 | api+ | 1 | 1 | Valid  |        |                                                                  |
| BBOV_I002690   | TA19670 | MAL7P1.149  |             |           |        |        |        |        |        | BBM_III05185 | 3 | api  | 0 | 0 | Valid  |        |                                                                  |
| BBOV_IV002620  | TA04280 | PF13_0263   |             |           |        |        |        |        |        | BBM_III05190 | 3 | api  | 0 | 0 | Valid  |        |                                                                  |
| BBOV_IV002610  | TA04285 |             |             |           |        |        |        |        |        | BBM_III05195 | 2 | piro | 0 | 0 | Valid  |        |                                                                  |
|                |         |             |             |           |        |        |        |        |        | BBM_III05200 | 0 |      | 0 | 0 | NA     |        |                                                                  |
| BBOV_IV002570  |         |             | LmjF10.0560 |           |        |        |        |        |        | BBM_III05205 | 2 |      | 0 | 0 | NA     |        |                                                                  |
|                | TA04300 |             |             |           |        |        |        |        |        | BBM_III05210 | 1 |      | 0 | 0 | NA     |        |                                                                  |
| BBOV_IV002590  | TA04295 | PF11_0419   | LmjF35.1830 |           |        |        |        |        |        | BBM_III05215 | 4 | api+ | 0 | 0 | Valid  |        |                                                                  |
| BBOV_IV002690  | TA04230 | PF11_0420   | LmjF10.0810 |           |        |        |        |        |        | BBM_III05220 | 4 | api+ | 0 | 0 | Valid  |        |                                                                  |
|                |         | MAL7P1.108  | LmjF07.1080 | YJR092W   |        |        |        |        |        | BBM_III05225 | 3 |      | 0 | 0 | NA     |        |                                                                  |
| BBOV_III001450 | TA17785 | MAL7P1.110  | LmjF36.4630 | YJR069C   | K01519 | K01519 |        |        |        | BBM_III05230 | 5 |      | 2 | 1 | K01519 | K01519 | nucleoside-triphosphate pyrophosphatase [EC:3.6.1.19]            |
| BBOV_III001440 | TA17770 | MAL7P1.107  |             |           |        |        |        |        |        | BBM_III05235 | 3 | api  | 0 | 0 | Valid  |        |                                                                  |
|                |         |             |             | YHR199C-A |        |        |        |        |        | BBM_III05240 | 1 |      | 0 | 0 | NA     |        |                                                                  |
| BBOV_III001680 | TA17660 | PF07_0085   |             | YNR074C   |        |        |        |        |        | BBM_III05245 | 4 | api+ | 0 | 0 | Valid  |        |                                                                  |
| BBOV_III001670 | TA17665 | PFA_0230c   | LmjF32.2940 |           |        |        |        |        |        | BBM_III05250 | 4 | api+ | 0 | 0 | Valid  |        |                                                                  |
| BBOV_III001660 | TA17670 | PFA_0225w   |             |           | K03527 | K03527 | K03527 |        |        | BBM_III05255 | 3 | api  | 3 | 1 | K03527 | K03527 | 4-hydroxy-3-methylbut-2-enyl diphosphate reductase [EC:1.17.1.2] |
| BBOV_III001650 | TA17680 | PFA_0220w   |             |           | K11854 | K11854 |        |        |        | BBM_III05260 | 3 | api  | 2 | 1 | Valid  |        |                                                                  |
|                |         | MAL13P1.121 | LmjF10.0170 | YER005W   |        |        |        | K01529 | K14642 | BBM_III05265 | 3 |      | 2 | 2 | NA     |        |                                                                  |
| BBOV_III001640 | TA17685 | PF13_0133   | LmjF35.0870 | YIR039C   |        | K01386 | K01386 |        | K01386 | BBM_III05270 | 5 |      | 3 | 1 | K01386 | K01386 |                                                                  |
| BBOV_III001630 | TA17690 | MAL7P1.38   |             | YGL097W   |        |        |        |        |        | BBM_III05275 | 4 | api+ | 0 | 0 | Valid  |        |                                                                  |
|                |         |             |             |           |        |        |        |        |        | BBM_III05280 | 0 |      | 0 | 0 | NA     |        |                                                                  |
|                |         |             |             |           |        |        |        |        |        | BBM_III05285 | 0 |      | 0 | 0 | NA     |        |                                                                  |
| BBOV_III001610 | TA17700 | PF13_0124   | LmjF03.0920 | YBL102W   |        |        |        |        |        | BBM_III05290 | 5 |      | 0 | 0 | Valid  |        |                                                                  |
| BBOV_III001600 | TA17705 |             |             |           |        |        |        |        |        | BBM_III05295 | 2 | piro | 0 | 0 | Valid  |        |                                                                  |
| BBOV_III001420 | TA17760 | PF08_0028   |             | YGL112C   |        |        |        |        | K03131 | BBM_III05300 | 4 | api+ | 1 | 1 | Valid  |        |                                                                  |
| BBOV_III001510 | TA17755 | PF13_0251   | LmjF36.3200 | YLR234W   | K03165 | K03165 | K03165 | K03165 | K03165 | BBM_III05305 | 5 |      | 5 | 1 | K03165 | K03165 | DNA topoisomerase III [EC:5.99.1.2]                              |
| BBOV_III001520 | TA17750 | MAL13P1.120 |             |           | K13091 | K13091 | K13091 |        |        | BBM_III05310 | 3 | api  | 3 | 1 | K13091 | K13091 | RNA-binding protein 39                                           |
| BBOV_III001540 | TA17740 | MAL13P1.130 |             | YFL050C   |        |        |        |        |        | BBM_III05315 | 4 | api+ | 0 | 0 | Valid  |        |                                                                  |
|                | TA17735 | PF13_0104   |             | YNL126W   |        |        |        |        |        | BBM_III05320 | 3 |      | 0 | 0 | NA     |        |                                                                  |
|                |         |             |             |           |        |        |        |        |        | BBM_III05325 | 0 |      | 0 | 0 | NA     |        |                                                                  |
| BBOV_III001570 | TA17725 | PF13_0131   |             | YFL017C   |        |        |        |        | K00621 | BBM_III05330 | 4 | api+ | 1 | 1 | Valid  |        |                                                                  |
| BBOV_III001580 | TA17715 | PF13_0132   | LmjF06.0580 | YOL127W   | K02893 | K02893 | K02893 | K02893 | K02893 | BBM_III05335 | 5 |      | 5 | 1 | K02893 | K02893 | large subunit ribosomal protein L23Ae                            |
| BBOV_III001590 | TA17710 |             |             |           |        |        |        |        |        | BBM_III05340 | 2 | piro | 0 | 0 | Valid  |        |                                                                  |
| BBOV_III001700 | TA17650 | MAL13P1.234 | LmjF34.1390 | YLL040C   |        |        |        |        |        | BBM_III05345 | 5 |      | 0 | 0 | Valid  |        |                                                                  |
| BBOV_III001710 | TA17645 | PF10165c    | LmjF03.0690 |           |        | K01529 | K01529 |        |        | BBM_III05350 | 4 | api+ | 2 | 1 | Valid  |        |                                                                  |
|                |         |             |             |           |        |        |        |        |        | BBM_III05355 | 0 |      | 0 | 0 | NA     |        |                                                                  |
| BBOV_III001720 | TA17640 | PF10155c    | LmjF18.0890 | YML001W   | K07897 | K07897 | K07897 | K07897 | K07897 | BBM_III05360 | 5 |      | 5 | 1 | K07897 | K07897 | Ras-related protein Rab-7A                                       |



|                |         |             |             |           |        |        |        |        |        |              |   |      |   |   |        |        |
|----------------|---------|-------------|-------------|-----------|--------|--------|--------|--------|--------|--------------|---|------|---|---|--------|--------|
| BBOV_III002070 | TA18630 | PFB0895c    | LmjF24.0990 | YOR217W   | K10754 | K10754 | K10754 | K10754 | K10754 | BBM_III05630 | 5 |      | 5 | 1 | K10754 | K10754 |
|                | TA18635 | PFL1825w    |             |           |        |        |        |        |        | BBM_III05635 | 2 |      | 0 | 0 | NA     |        |
| BBOV_III002030 | TA18660 | PFL1820w    | LmjF24.1490 | YLR196W   | K14791 |        | K14791 | K14791 | K14791 | BBM_III05640 | 5 |      | 4 | 1 | K14791 | K14791 |
| BBOV_III002040 |         |             |             |           | K14773 |        |        |        |        | BBM_III05645 | 1 |      | 1 | 1 | NA     |        |
|                | TA18680 |             |             |           |        |        |        |        |        | BBM_III05650 | 1 |      | 0 | 0 | NA     |        |
| BBOV_III002060 | TA18685 | PFL1230w    | LmjF16.1390 |           |        |        |        | K14568 |        | BBM_III05655 | 4 | api+ | 2 | 1 | Valid  |        |
| BBOV_III002380 | TA18690 |             |             |           |        |        |        |        |        | BBM_III05660 | 2 | piro | 0 | 0 | Valid  |        |
| BBOV_III002400 |         | PF14_0718   |             |           |        |        |        |        |        | BBM_III05665 | 2 |      | 0 | 0 | NA     |        |
| BBOV_III002410 | TA18695 | PFL1830w    |             | YNR032C-A | K13113 | K13113 | K13113 | K13113 | K13113 | BBM_III05670 | 4 | api+ | 4 | 1 | K13113 | K13113 |
|                | TA18700 |             | LmjF25.2280 |           |        |        |        |        |        | BBM_III05675 | 2 |      | 0 | 0 | NA     |        |
| BBOV_III002430 | TA18705 | PFE0745w    |             |           |        |        |        |        |        | BBM_III05680 | 3 | api  | 0 | 0 | Valid  |        |
| BBOV_III002440 | TA18710 |             |             |           |        |        |        |        |        | BBM_III05685 | 2 | piro | 0 | 0 | Valid  |        |
| BBOV_III002450 | TA18720 | PFE0740c    |             |           |        |        |        |        |        | BBM_III05690 | 3 | api  | 0 | 0 | Valid  |        |
| BBOV_III002460 | TA18725 | PFE0730c    |             | YOR095C   | K01807 | K01807 | K01807 | K01807 | K01807 | BBM_III05695 | 4 | api+ | 4 | 1 | K01807 | K01807 |
|                |         |             |             |           |        |        |        |        |        | BBM_III05700 | 0 |      | 0 | 0 | NA     |        |
| BBOV_III002470 | TA18735 |             | LmjF36.6800 |           |        |        |        |        |        | BBM_III05705 | 3 |      | 0 | 0 | NA     |        |
|                | TA18740 | PFL1845c    |             |           |        | K04507 | K04507 |        |        | BBM_III05710 | 2 |      | 2 | 1 | NA     |        |
| BBOV_III002480 | TA18745 | PF13_0159   |             | YBR093C   |        |        |        |        | K01078 | BBM_III05715 | 4 | api+ | 1 | 1 | Valid  |        |
| BBOV_I004530   | TA18775 | MAL13P1.152 |             |           |        |        |        |        |        | BBM_III05720 | 3 | api  | 0 | 0 | Valid  |        |
|                |         |             |             |           |        |        |        |        |        | BBM_III05722 |   |      |   |   | Valid  |        |
| BBOV_I004620   | TA18790 | MAL13P1.134 |             | YPL008W   | K11273 | K11273 | K11273 | K11273 | K11273 | BBM_III05725 | 4 | api+ | 4 | 1 | K11273 | K11273 |
| BBOV_I004550   | TA18785 | PFE0705c    |             |           |        |        |        |        |        | BBM_III05730 | 3 | api  | 0 | 0 | Valid  |        |
| BBOV_I004610   | TA18795 | PFF0125c    | LmjF35.5320 | YPR045C   |        |        |        |        |        | BBM_III05735 | 5 |      | 0 | 0 | Valid  |        |
| BBOV_I004600   | TA04900 | PFF0120w    | LmjF34.4030 | YPR176C   | K05956 | K05956 | K05956 | K05956 | K05956 | BBM_III05740 | 5 |      | 5 | 1 | K05956 | K05956 |
| BBOV_I004580   | TA04910 | PFL0835w    | LmjF26.0270 |           | K03977 | K03977 |        | K03977 |        | BBM_III05745 | 4 | api+ | 3 | 1 | K03977 | K03977 |
| BBOV_I004570   | TA04920 | PFL0860c    | LmjF26.2630 | YBL071W-A |        |        |        |        |        | BBM_III05750 | 5 |      | 0 | 0 | Valid  |        |
|                | TA04925 | PFC0556c    |             |           |        |        |        |        |        | BBM_III05755 | 2 |      | 0 | 0 | NA     |        |
| BBOV_I004630   | TA04930 |             |             |           | K12189 | K12189 |        |        |        | BBM_III05760 | 2 | piro | 2 | 1 | K12189 | K12189 |
| BBOV_I004640   | TA04935 | PF11_0213   | LmjF03.0340 |           |        |        |        |        |        | BBM_III05765 | 4 | api+ | 0 | 0 | Valid  |        |
| BBOV_I004650   | TA04940 | PF11_0212   | L1156.05    | YER168C   |        |        | K00974 | K00974 |        | BBM_III05770 | 5 |      | 2 | 1 | K00974 | K00974 |
| BBOV_I004660   | TA04945 | PF11_0219   |             |           |        |        |        |        |        | BBM_III05775 | 3 | api  | 0 | 0 | Valid  |        |
| BBOV_I004670   |         | PF11_0218   | LmjF16.0670 |           |        |        |        |        |        | BBM_III05780 | 3 |      | 0 | 0 | NA     |        |
| BBOV_I004690   | TA04955 | PF14_0346   |             |           | K07376 | K07376 | K07376 |        |        | BBM_III05785 | 3 | api  | 3 | 1 | K07376 | K07376 |
| BBOV_I004700   | TA04960 | PFI0880c    |             |           | K01078 | K01078 | K01078 |        |        | BBM_III05790 | 3 | api  | 3 | 1 | K01078 | K01078 |
| BBOV_I004710   | TA04965 | PF10_0216   |             |           |        |        |        |        |        | BBM_III05795 | 3 | api  | 0 | 0 | Valid  |        |
| BBOV_I004720   |         | PFI0885w    |             | YML054C   |        |        |        |        | K00101 | BBM_III05800 | 3 |      | 1 | 1 | NA     |        |
| BBOV_I004730   | TA04980 | PFI0890c    |             |           |        |        |        |        |        | BBM_III05805 | 3 | api  | 0 | 0 | Valid  |        |
| BBOV_I004740   | TA04985 | PF11_0083   |             |           |        |        |        |        |        | BBM_III05810 | 3 | api  | 0 | 0 | Valid  |        |
| BBOV_I004760   | TA04990 | PF11_0524   | LmjF32.0715 | YER112W   | K12623 | K12623 | K12623 | K12623 | K12623 | BBM_III05815 | 5 |      | 5 | 1 | K12623 | K12623 |
| BBOV_I004770   | TA04995 | MAL13P1.72  | LmjF35.0220 |           |        |        |        |        |        | BBM_III05820 | 4 | api+ | 0 | 0 | Valid  |        |
| BBOV_I004780   | TA05000 |             |             |           |        |        |        |        |        | BBM_III05825 | 2 | piro | 0 | 0 | Valid  |        |
|                | TA05005 |             |             |           |        |        |        |        |        | BBM_III05830 | 1 |      | 0 | 0 | NA     |        |
| BBOV_I004800   | TA05010 | PF13_0080   |             | Q0055     | K11126 | K11126 |        |        |        | BBM_III05835 | 4 | api+ | 2 | 1 | Valid  |        |
| BBOV_I004810   | TA05030 | MAL13P1.74  | LmjF30.0010 |           |        |        |        |        | K07019 | BBM_III05840 | 4 | api+ | 1 | 1 | Valid  |        |
|                | TA05035 | PF13_0081   |             |           |        |        |        |        |        | BBM_III05845 | 2 |      | 0 | 0 | NA     |        |
|                |         |             |             |           |        |        |        |        |        | BBM_III05850 | 0 |      | 0 | 0 | NA     |        |
| BBOV_I004830   | TA05040 | PF13_0055   |             |           |        |        |        |        |        | BBM_III05855 | 3 | api  | 0 | 0 | Valid  |        |
|                |         |             |             |           |        |        |        |        |        | BBM_III05860 | 0 |      | 0 | 0 | NA     |        |
|                |         |             | LmjF36.3730 |           |        |        |        |        |        | BBM_III05865 | 1 |      | 0 | 0 | NA     |        |
| BBOV_I004850   | TA05055 |             | LmjF06.0150 | YHR124W   |        |        |        |        | K12769 | BBM_III05870 | 4 |      | 1 | 1 | NA     |        |
| BBOV_I004860   |         | PF14_0351   |             |           |        |        |        |        |        | BBM_III05875 | 2 |      | 0 | 0 | NA     |        |
| BBOV_I004870   | TA05060 | PF14_0352   | LmjF28.0890 | YER070W   | K10807 | K10807 | K10807 | K10807 | K10807 | BBM_III05880 | 5 |      | 5 | 1 | K10807 | K10807 |
|                |         |             | LmjF25.2150 |           |        |        |        |        |        | BBM_III05885 | 1 |      | 0 | 0 | NA     |        |
| BBOV_I004900   | TA05070 | PF14_0348   |             |           |        | K01358 | K01358 |        |        | BBM_III05890 | 3 | api  | 2 | 1 | Valid  |        |

|  |                                                               |
|--|---------------------------------------------------------------|
|  | replication factor C subunit 1                                |
|  |                                                               |
|  | PWP1, periodic tryptophan protein 1                           |
|  |                                                               |
|  |                                                               |
|  |                                                               |
|  |                                                               |
|  | ubiquitin-like protein 5                                      |
|  |                                                               |
|  |                                                               |
|  |                                                               |
|  | ribose 5-phosphate isomerase A [EC:5.3.1.6]                   |
|  |                                                               |
|  |                                                               |
|  |                                                               |
|  | tRNA, Lys, anticodon CTT                                      |
|  | chromosome transmission fidelity protein 1 [EC:3.6.1.-]       |
|  |                                                               |
|  |                                                               |
|  | geranylgeranyl transferase type-2 subunit beta [EC:2.5.1.60]  |
|  | engA, GTP-binding protein                                     |
|  |                                                               |
|  |                                                               |
|  | ESCRT-II complex subunit VPS25                                |
|  |                                                               |
|  | tRNA nucleotidyltransferase (CCA-adding enzyme) [EC:2.7.7.25] |
|  |                                                               |
|  |                                                               |
|  |                                                               |
|  | protein kinase, cGMP-dependent [EC:2.7.11.12]                 |
|  | acid phosphatase [EC:3.1.3.2]                                 |
|  |                                                               |
|  |                                                               |
|  |                                                               |
|  | U6 snRNA-associated Sm-like protein LSM4                      |
|  |                                                               |
|  |                                                               |
|  |                                                               |
|  |                                                               |
|  |                                                               |
|  |                                                               |
|  |                                                               |
|  | ribonucleoside-diphosphate reductase subunit M1 [EC:1.17.4.1] |
|  |                                                               |
|  |                                                               |
|  |                                                               |

|                |         |             |             |           |        |        |        |        |        |              |   |      |   |   |        |        |                                                                    |
|----------------|---------|-------------|-------------|-----------|--------|--------|--------|--------|--------|--------------|---|------|---|---|--------|--------|--------------------------------------------------------------------|
| BBOV_III008200 | TA10340 | PF13_0070   | LmjF21.1430 | YER178W   | K00166 | K00166 | K00166 | K00166 | K00161 | BBM_III05895 | 5 |      | 5 | 2 | K00166 | K00166 | 2-oxoisovalerate dehydrogenase E1 component, alpha subunit         |
| BBOV_III008210 | TA10335 | MAL13P1.57  |             | YAL001C   |        |        |        |        |        | BBM_III05900 | 4 | api+ | 0 | 0 | Valid  |        |                                                                    |
| BBOV_III008220 | TA10330 | PF13_0068   |             | YDR175C   |        |        |        |        |        | BBM_III05905 | 4 | api+ | 0 | 0 | Valid  |        |                                                                    |
| BBOV_III008160 | TA10360 |             | LmjF20.0060 |           |        |        |        |        |        | BBM_III05910 | 3 |      | 0 | 0 | NA     |        |                                                                    |
| BBOV_III008150 | TA10370 | PF13_0065   | LmjF34.3670 | YDL185W   | K02145 | K02145 | K02145 | K02145 | K02145 | BBM_III05915 | 5 |      | 5 | 1 | K02145 | K02145 | V-type H <sup>+</sup> -transporting ATPase subunit A [EC:3.6.3.14] |
| BBOV_III008140 | TA10375 |             |             |           |        |        |        |        |        | BBM_III05920 | 2 | piro | 0 | 0 | Valid  |        |                                                                    |
| BBOV_III008130 | TA10380 | MAL13P1.55  |             |           | K08738 | K08738 | K08738 |        |        | BBM_III05925 | 3 | api  | 3 | 1 | K08738 | K08738 | cytochrome c                                                       |
|                |         |             |             |           |        |        |        |        |        | BBM_III05930 | 0 |      | 0 | 0 | NA     |        |                                                                    |
|                |         |             |             |           |        |        |        |        |        | BBM_III05935 | 0 |      | 0 | 0 | NA     |        |                                                                    |
| BBOV_III008120 | TA10385 | PF11_0043   | LmjF03.0440 | YDL081C   | K02942 | K02942 | K02942 | K02942 | K02942 | BBM_III05940 | 5 |      | 5 | 1 | K02942 | K02942 | large subunit ribosomal protein LP1                                |
| BBOV_III008110 | TA10390 | PF13_0077   |             |           |        |        |        |        |        | BBM_III05945 | 3 | api  | 0 | 0 | Valid  |        |                                                                    |
| BBOV_III008090 | TA10400 | PF13_0079   | LmjF20.1100 |           |        |        |        |        |        | BBM_III05950 | 4 | api+ | 0 | 0 | Valid  |        |                                                                    |
| BBOV_III007990 | TA10405 | MAL13P1.69  |             | YOR111W   | K06287 | K06287 | K06287 |        | K06287 | BBM_III05955 | 4 | api+ | 4 | 1 | K06287 | K06287 | septum formation protein                                           |
| BBOV_III007980 | TA10410 | PFD0160w    |             |           |        |        |        |        |        | BBM_III05960 | 3 | api  | 0 | 0 | Valid  |        |                                                                    |
| BBOV_III007950 | TA10425 | PF10_0155   | LmjF14.1160 | YGR254W   | K01689 | K01689 | K01689 | K01689 | K01689 | BBM_III05965 | 5 |      | 5 | 1 | K01689 | K01689 | enolase [EC:4.2.1.11]                                              |
| BBOV_III007940 | TA10430 | PFC1050w    |             |           |        |        |        |        |        | BBM_III05970 | 3 | api  | 0 | 0 | Valid  |        |                                                                    |
| BBOV_III007930 | TA10435 | PFC1055w    |             | YLR373C   |        |        |        |        |        | BBM_III05975 | 4 | api+ | 0 | 0 | Valid  |        |                                                                    |
| BBOV_III007920 | TA10440 | PFC1060c    |             | YOR308C   |        |        | K11984 |        | K11984 | BBM_III05980 | 4 | api+ | 2 | 1 | Valid  |        |                                                                    |
|                |         |             |             |           |        |        |        |        |        | BBM_III05985 | 0 |      | 0 | 0 | NA     |        |                                                                    |
| BBOV_III007900 | TA10450 | PFC0550w    | LmjF28.0040 |           | K07126 |        |        |        |        | BBM_III05990 | 4 | api+ | 1 | 1 | Valid  |        |                                                                    |
| BBOV_III007890 | TA10455 |             |             | YJR138W   |        |        |        |        |        | BBM_III05995 | 3 |      | 0 | 0 | NA     |        |                                                                    |
|                |         |             | LmjF35.0610 |           |        |        |        |        |        | BBM_III06000 | 1 |      | 0 | 0 | NA     |        |                                                                    |
| BBOV_III007870 | TA10460 | PF11_0211   |             |           |        |        |        |        |        | BBM_III06005 | 3 | api  | 0 | 0 | Valid  |        |                                                                    |
| BBOV_III007860 | TA10465 | PF11_0208   | LmjF08.0060 | YKL152C   | K01834 | K01834 | K01834 | K01834 | K01834 | BBM_III06010 | 5 |      | 5 | 1 | K01834 | K01834 | phosphoglycerate mutase [EC:5.4.2.1]                               |
| BBOV_III007850 | TA10470 | PF14_0350   |             |           |        |        |        |        |        | BBM_III06015 | 3 | api  | 0 | 0 | Valid  |        |                                                                    |
| BBOV_III007840 | TA10480 | PF11_0099   |             |           | K09536 | K09536 |        |        |        | BBM_III06020 | 3 | api  | 2 | 1 | Valid  |        |                                                                    |
| BBOV_III007820 | TA10485 | PF11_0101   | LmjF33.0700 |           |        |        |        |        |        | BBM_III06025 | 4 | api+ | 0 | 0 | Valid  |        |                                                                    |
| BBOV_III007810 | TA10490 | PF11_0084   |             |           |        |        |        |        |        | BBM_III06030 | 3 | api  | 0 | 0 | Valid  |        |                                                                    |
|                |         | PF11_0215   |             |           |        |        |        |        |        | BBM_III06035 | 1 |      | 0 | 0 | NA     |        |                                                                    |
|                |         |             |             | YDR461C-A |        |        |        |        |        | BBM_III06040 | 1 |      | 0 | 0 | NA     |        |                                                                    |
|                |         |             |             |           |        |        |        |        |        | BBM_III06045 | 0 |      | 0 | 0 | NA     |        |                                                                    |
| BBOV_III007800 | TA10500 | PFI0875w    |             |           | K09490 | K09490 | K09490 |        |        | BBM_III06050 | 3 | api  | 3 | 1 | K09490 | K09490 | heat shock 70kDa protein 5                                         |
| BBOV_III007790 | TA10630 | PF11_0096   | LmjF35.1730 | YOR061W   | K03097 | K03097 | K03097 | K03097 | K03097 | BBM_III06055 | 5 |      | 5 | 1 | K03097 | K03097 | CSNK2A, casein kinase II subunit alpha [EC:2.7.11.1]               |
| BBOV_III007780 | TA10625 | PF11_0097   | LmjF25.2140 | YOR142W   | K01899 | K01899 | K01899 | K01899 | K01899 | BBM_III06060 | 5 |      | 5 | 1 | K01899 | K01899 | succinyl-CoA synthetase alpha subunit [EC:6.2.1.4 6.2.1.5]         |
| BBOV_III007770 | TA10620 | PF11_0068   | LmjF33.0560 |           |        |        |        |        |        | BBM_III06065 | 4 | api+ | 0 | 0 | Valid  |        |                                                                    |
| BBOV_III007760 | TA10615 | PF11_0069   | LmjF31.0970 |           |        |        |        |        |        | BBM_III06070 | 4 | api+ | 0 | 0 | Valid  |        |                                                                    |
| BBOV_III007680 | TA10610 | PF11_0071   | LmjF34.3500 | YDR190C   | K04499 | K04499 | K04499 | K04499 | K04499 | BBM_III06075 | 5 |      | 5 | 1 | K04499 | K04499 | RuvB-like protein 1 (pontin 52)                                    |
| BBOV_III007670 | TA10605 | MAL13P1.310 | LmjF33.2010 | YMR154C   |        |        |        |        |        | BBM_III06080 | 5 |      | 0 | 0 | Valid  |        |                                                                    |
|                |         | PFA_0240w   | LmjF32.2800 |           |        |        |        |        |        | BBM_III06085 | 2 |      | 0 | 0 | NA     |        |                                                                    |
| BBOV_III007650 | TA10595 | PFC0100c    | LmjF36.4820 | YPL151C   | K12862 | K12862 | K12862 | K12862 | K12862 | BBM_III06090 | 5 |      | 5 | 1 | K12862 | K12862 | pleiotropic regulator 1                                            |
| BBOV_III007660 | TA10600 | MAL13P1.19  | LmjF29.2110 | YHR099W   | K08874 | K08874 |        |        | K08874 | BBM_III06095 | 5 |      | 3 | 1 | K08874 | K08874 | transformation/transcription domain-associated protein             |
| BBOV_III007780 |         | PFB0510w    | LmjF11.0880 |           |        |        |        |        |        | BBM_III06100 | 3 |      | 0 | 0 | NA     |        |                                                                    |
|                |         |             |             |           |        |        |        |        |        | BBM_III06105 | 0 |      | 0 | 0 | NA     |        |                                                                    |
| BBOV_IV009220  | TA10580 | MAL13P1.295 | LmjF05.1190 | YDR206W   |        |        |        |        | K11132 | BBM_III06110 | 5 |      | 1 | 1 | K11132 | K11132 | telomere elongation protein [EC:2.7.7.-]                           |
| BBOV_III007620 | TA10575 | PFE0105c    |             |           |        |        |        |        |        | BBM_III06115 | 3 | api  | 0 | 0 | Valid  |        |                                                                    |
| BBOV_III007610 | TA10570 | PFC0835c    | LmjF03.0490 |           |        |        |        |        |        | BBM_III06120 | 4 | api+ | 0 | 0 | Valid  |        |                                                                    |
| BBOV_III007590 | TA10565 | PFC0845c    | LmjF21.0023 | YOL133W   | K03868 | K03868 | K03868 | K03868 | K03868 | BBM_III06125 | 5 |      | 5 | 1 | K03868 | K03868 | RING-box protein 1                                                 |
| BBOV_III007580 | TA10560 |             | LmjF35.0570 |           |        |        |        |        |        | BBM_III06130 | 3 |      | 0 | 0 | NA     |        |                                                                    |
| BBOV_III007570 | TA10550 | PFA_0255c   | LmjF26.1150 |           |        |        |        |        |        | BBM_III06135 | 4 | api+ | 0 | 0 | Valid  |        |                                                                    |
|                |         |             |             |           |        |        |        |        |        | BBM_III06140 | 0 |      | 0 | 0 | NA     |        |                                                                    |
| BBOV_III007560 | TA10545 | PF11_0061   | LmjF02.0020 | YNL030W   | K11254 | K11254 | K11254 | K11254 | K11254 | BBM_III06145 | 5 |      | 5 | 1 | K11254 | K11254 | histone H4                                                         |
|                |         |             |             |           |        |        |        |        |        | BBM_III06150 | 0 |      | 0 | 0 | NA     |        |                                                                    |
| BBOV_III007550 | TA10525 | PF11_0060   |             |           |        |        |        |        |        | BBM_III06155 | 3 | api  | 0 | 0 | Valid  |        |                                                                    |
| BBOV_III007540 | TA10520 |             |             |           |        |        |        |        |        | BBM_III06160 | 2 | piro | 0 | 0 | Valid  |        |                                                                    |

|                |         |              |             |         |        |        |        |        |        |              |   |      |   |   |        |        |                                                                    |
|----------------|---------|--------------|-------------|---------|--------|--------|--------|--------|--------|--------------|---|------|---|---|--------|--------|--------------------------------------------------------------------|
| BBOV_III007530 | TA10515 | PF11_0065    | LmjF13.1230 | YJR145C | K02987 | K02987 | K02987 | K02987 | K02987 | BBM_III06165 | 5 |      | 5 | 1 | K02987 | K02987 | small subunit ribosomal protein S4e                                |
| BBOV_III007520 | TA10510 | PF11_0098    |             |         |        |        |        |        |        | BBM_III06170 | 3 | api  | 0 | 0 | Valid  |        |                                                                    |
| BBOV_III007470 | TA10635 |              | LmjF25.1540 |         |        |        |        |        |        | BBM_III06175 | 3 |      | 0 | 0 | NA     |        |                                                                    |
| BBOV_III007500 | TA10670 | PF11_0077    |             |         |        |        |        |        |        | BBM_III06180 | 3 | api  | 0 | 0 | Valid  |        |                                                                    |
|                |         |              |             | YKL017C |        |        |        |        |        | BBM_III06185 | 1 |      | 0 | 0 | NA     |        |                                                                    |
| BBOV_III007490 | TA10680 | PF11_0423    |             |         |        |        |        |        |        | BBM_III06190 | 3 | api  | 0 | 0 | Valid  |        |                                                                    |
| BBOV_III007440 | TA10685 | PF11_0073    |             |         |        |        |        |        |        | BBM_III06195 | 3 | api  | 0 | 0 | Valid  |        |                                                                    |
| BBOV_III007430 | TA10700 | PF11_0072    |             |         |        |        |        |        |        | BBM_III06200 | 3 | api  | 0 | 0 | Valid  |        |                                                                    |
| BBOV_III007420 | TA10705 | MAL7P1.167   | LmjF11.0380 |         | K05292 | K05292 |        |        |        | BBM_III06205 | 4 | api+ | 2 | 1 | Valid  |        |                                                                    |
| BBOV_III007400 | TA10710 | PF13_0150    | LmjF34.0360 | YOR116C | K03018 | K03018 | K03018 | K03018 | K03018 | BBM_III06210 | 5 |      | 5 | 1 | K03018 | K03018 | DNA-directed RNA polymerase III subunit C1 [EC:2.7.7.6]            |
| BBOV_III007390 | TA10715 |              |             |         |        |        |        |        |        | BBM_III06215 | 2 | piro | 0 | 0 | Valid  |        |                                                                    |
| BBOV_III007380 | TA10720 | PF14_0417    |             |         |        |        |        |        |        | BBM_III06220 | 3 | api  | 0 | 0 | Valid  |        |                                                                    |
| BBOV_III007370 | TA10725 | PFC0105w     | LmjF30.3580 | YMR216C | K08832 | K08282 | K08282 | K08832 | K08831 | BBM_III06225 | 5 |      | 5 | 2 | K08832 | K08832 | serine/threonine kinase 23 [EC:2.7.11.1]                           |
| BBOV_III007340 | TA10735 |              | LmjF23.1110 | YFL021W |        |        |        |        | K09184 | BBM_III06230 | 4 |      | 1 | 1 | NA     |        |                                                                    |
| BBOV_III007320 | TA10755 | PF13_0265    | LmjF36.5930 |         |        |        |        |        |        | BBM_III06235 | 4 | api+ | 0 | 0 | Valid  |        |                                                                    |
|                |         | PF11705w     | LmjF36.4750 |         |        |        | K03861 | K03861 |        | BBM_III06240 | 2 |      | 2 | 1 | NA     |        |                                                                    |
| BBOV_III007310 | TA10760 | PF11700c     | LmjF25.2180 | YLR396C |        |        |        |        |        | BBM_III06245 | 5 |      | 0 | 0 | Valid  |        |                                                                    |
|                |         |              |             |         |        |        |        |        |        | BBM_III06250 | 0 |      | 0 | 0 | NA     |        |                                                                    |
| BBOV_III007300 | TA10770 |              |             |         |        |        |        |        |        | BBM_III06255 | 2 | piro | 0 | 0 | Valid  |        |                                                                    |
| BBOV_III007290 | TA10775 | PFC1005c     | LmjF16.0830 | YLL027W |        |        | K13628 | K13628 |        | BBM_III06260 | 5 |      | 2 | 1 | K13628 | K13628 | iron-sulfur cluster assembly protein                               |
| BBOV_III007280 | TA10780 | PFA_0370w    |             |         |        |        |        |        |        | BBM_III06265 | 3 | api  | 0 | 0 | Valid  |        |                                                                    |
|                |         |              |             |         |        |        |        |        |        | BBM_III06270 | 0 |      | 0 | 0 | NA     |        |                                                                    |
|                | TA10785 |              |             |         |        |        |        |        |        | BBM_III06275 | 1 |      | 0 | 0 | NA     |        |                                                                    |
| BBOV_III007160 | TA10790 | PFA_0545c    | LmjF17.0540 | YMR078C | K11269 |        |        | K11269 | K11269 | BBM_III06280 | 5 |      | 3 | 1 | K11269 | K11269 | chromosome transmission fidelity protein 18                        |
| BBOV_III007180 | TA10805 |              |             |         |        |        |        |        |        | BBM_III06285 | 2 | piro | 0 | 0 | Valid  |        |                                                                    |
| BBOV_III007200 | TA10815 |              |             | YOR196C |        |        |        |        | K03644 | BBM_III06290 | 3 |      | 1 | 1 | NA     |        |                                                                    |
| BBOV_III007210 | TA10820 | PFA_0450c    | LmjF26.0290 |         | K14397 | K14397 | K14397 | K14397 |        | BBM_III06295 | 4 | api+ | 4 | 1 | K14397 | K14397 | cleavage and polyadenylation specificity factor subunit 5          |
|                |         |              |             |         |        |        |        |        |        | BBM_III06300 | 0 |      | 0 | 0 | NA     |        |                                                                    |
| BBOV_III007230 | TA10830 | PFA_0465c    | LmjF25.0020 | YPR131C | K00670 | K00670 | K00670 | K00670 | K00670 | BBM_III06305 | 5 |      | 5 | 1 | K00670 | K00670 | peptide alpha-N-acetyltransferase [EC:2.3.1.88]                    |
|                | TA10835 | PFA_0460c    |             | YOR265W |        |        |        |        |        | BBM_III06310 | 3 |      | 0 | 0 | NA     |        |                                                                    |
|                |         | MAL13P1.342a |             |         |        |        |        |        |        | BBM_III06315 | 1 |      | 0 | 0 | NA     |        |                                                                    |
| BBOV_III007240 | TA10840 | PFA_0480w    | LmjF32.0870 | YFL022C | K01889 | K01889 | K01889 | K01889 | K01889 | BBM_III06320 | 5 |      | 5 | 1 | K01889 | K01889 | phenylalanyl-tRNA synthetase alpha chain [EC:6.1.1.20]             |
| BBOV_III007250 | TA10845 |              | LmjF27.1890 | YMR224C | K10865 | K10865 |        | K10865 | K10865 | BBM_III06325 | 4 |      | 4 | 1 | K10865 | K10865 | double-strand break repair protein MRE11                           |
| BBOV_III007260 | TA10850 | PF13_0242    | LmjF10.0290 | YDL066W | K00031 | K00031 | K00031 | K00031 | K00031 | BBM_III06330 | 5 |      | 5 | 1 | K00031 | K00031 | isocitrate dehydrogenase [EC:1.1.1.42]                             |
| BBOV_III007120 | TA10870 | PFA_0405w    |             |         |        |        |        |        |        | BBM_III06335 | 3 | api  | 0 | 0 | Valid  |        |                                                                    |
| BBOV_III007090 | TA10875 | PFA_0400c    | LmjF28.0110 | YER094C | K02735 | K02735 | K02735 | K02735 | K02735 | BBM_III06340 | 5 |      | 5 | 1 | K02735 | K02735 | 20S proteasome subunit beta 3 [EC:3.4.25.1]                        |
|                |         | PFF1225c     |             |         |        |        | K02335 |        |        | BBM_III06345 | 1 |      | 1 | 1 | NA     |        |                                                                    |
| BBOV_III007150 |         |              | LmjF17.0530 | YBL060W |        |        |        |        |        | BBM_III06350 | 3 |      | 0 | 0 | NA     |        |                                                                    |
|                |         |              |             |         |        |        |        |        |        | BBM_III06355 | 0 |      | 0 | 0 | NA     |        |                                                                    |
| BBOV_III007080 | TA10880 | PFF1190c     | LmjF09.0040 | YMR281W | K03434 | K03434 | K01463 | K03434 | K03434 | BBM_III06360 | 5 |      | 5 | 2 | K03434 | K03434 | N-acetylglucosaminylphosphatidylinositol deacetylase [EC:3.5.1.89] |
| BBOV_III006940 | TA10885 | PFF1185w     |             |         | K01509 | K01509 |        |        |        | BBM_III06365 | 3 | api  | 2 | 1 | Valid  |        |                                                                    |
|                |         |              |             | YDR495C |        |        |        |        |        | BBM_III06370 | 1 |      | 0 | 0 | NA     |        |                                                                    |
|                |         |              |             |         |        |        |        |        |        | BBM_III06372 |   |      |   |   | Valid  |        | tRNA, Asn, anticodon GTT                                           |
|                |         | PF10_0211    |             |         |        |        |        |        |        | BBM_III06375 | 1 |      | 0 | 0 | NA     |        |                                                                    |
|                |         |              |             |         |        |        |        |        |        | BBM_III06380 | 0 |      | 0 | 0 | NA     |        |                                                                    |
| BBOV_III006960 | TA10895 | PFI1510w     | LmjF16.0890 | YDR087C |        |        |        |        | K14849 | BBM_III06385 | 5 |      | 1 | 1 | K14849 | K14849 | RRP1, ribosomal RNA-processing protein 1                           |
| BBOV_III006970 | TA10900 | PFI1835c     | LmjF26.0190 | YKL040C |        |        |        |        |        | BBM_III06390 | 5 |      | 0 | 0 | Valid  |        |                                                                    |
| BBOV_III006980 | TA10905 | PFF1315w     |             |         |        |        |        |        |        | BBM_III06395 | 3 | api  | 0 | 0 | Valid  |        |                                                                    |
| BBOV_III006990 | TA10910 | PF10_0219    | LmjF16.0080 | YPL263C |        |        |        |        |        | BBM_III06400 | 5 |      | 0 | 0 | Valid  |        |                                                                    |
| BBOV_III007000 | TA10915 | PFF1300w     | LmjF35.0030 | YAL038W | K00873 | K00873 | K00873 | K00873 | K00873 | BBM_III06405 | 5 |      | 5 | 1 | K00873 | K00873 | pyruvate kinase [EC:2.7.1.40]                                      |
| BBOV_III007010 | TA10930 | PFF1305w     | LmjF06.0040 | YNL252C |        |        |        |        |        | BBM_III06410 | 5 |      | 0 | 0 | Valid  |        |                                                                    |
| BBOV_III007020 | TA10925 | PFF1265w     | LmjF10.0090 | YMR226C |        | K00540 | K00540 |        | K00540 | BBM_III06415 | 5 |      | 3 | 1 | K00540 | K00540 |                                                                    |
| BBOV_III007030 | TA10935 |              |             |         | K12586 | K12586 |        |        |        | BBM_III06420 | 2 | piro | 2 | 1 | K12586 | K12586 | exosome complex component RRP43                                    |
| BBOV_III007040 | TA10940 |              |             |         |        |        |        |        |        | BBM_III06425 | 2 | piro | 0 | 0 | Valid  |        |                                                                    |





















|                |         |             |             |         |        |        |        |        |        |              |   |      |   |   |        |        |
|----------------|---------|-------------|-------------|---------|--------|--------|--------|--------|--------|--------------|---|------|---|---|--------|--------|
| BBOV_III004620 | TA15215 | MAL7P1.340  | LmjF26.0460 | Q0130   | K02128 | K02128 |        | K02128 | K02128 | BBM_III08930 | 5 |      | 4 | 1 | K02128 | K02128 |
| BBOV_III003170 | TA09185 | PF14_0393   |             | YML069W | K09272 | K09272 | K09272 |        | K09272 | BBM_III08935 | 4 | api+ | 4 | 1 | K09272 | K09272 |
| BBOV_III003130 | TA09220 |             | LmjF25.1520 | YJL057C |        |        |        |        | K08286 | BBM_III08945 | 4 |      | 1 | 1 | NA     |        |
| BBOV_III003140 | TA09215 | PF14_0395   |             |         |        |        |        |        |        | BBM_III08950 | 3 | api  | 0 | 0 | Valid  |        |
| BBOV_III003150 | TA09210 | PFE0060w    |             |         |        |        |        |        |        | BBM_III08955 | 3 | api  | 0 | 0 | Valid  |        |
| BBOV_III003160 | TA09200 | PF14_0376   |             | YOL141W |        |        |        |        |        | BBM_III08965 | 4 | api+ | 0 | 0 | Valid  |        |
|                | TA16570 | PFB0815w    | LmjF27.2470 |         |        | K13412 | K08282 |        |        | BBM_III08970 | 3 |      | 2 | 2 | NA     |        |
|                | TA16410 | PFB0826c    |             | YKL051W |        |        |        |        |        | BBM_III08975 | 3 |      | 0 | 0 | NA     |        |
| BBOV_III002940 | TA16405 | PFB0830w    | LmjF30.3200 | YGL189C | K02976 | K02976 | K02976 | K02976 | K02976 | BBM_III08980 | 5 |      | 5 | 1 | K02976 | K02976 |
|                |         | PF11_0041   |             |         |        |        |        |        |        | BBM_III08985 | 1 |      | 0 | 0 | NA     |        |
| BBOV_III002960 | TA16350 | PFB0840w    | LmjF30.2630 | YJR068W | K10755 | K10755 | K10755 | K10755 | K10755 | BBM_III08990 | 5 |      | 5 | 1 | K10755 | K10755 |
| BBOV_III002970 |         | PF11_0263   | LmjF07.0410 |         |        |        |        |        |        | BBM_III08995 | 3 |      | 0 | 0 | NA     |        |
| BBOV_III002980 | TA16245 | PF11_0262   |             |         |        |        |        |        |        | BBM_III09000 | 3 | api  | 0 | 0 | Valid  |        |
| BBOV_III002990 | TA16240 | PF11_0264   | LmjF24.1150 | YFL036W | K10908 | K10908 | K10908 | K10908 | K10908 | BBM_III09005 | 5 |      | 5 | 1 | K10908 | K10908 |
|                |         |             |             |         |        |        |        |        |        | BBM_III09015 | 0 |      | 0 | 0 | NA     |        |
|                | TA16135 | PF11_0266a  |             |         |        |        |        |        |        | BBM_III09020 | 2 |      | 0 | 0 | NA     |        |
| BBOV_III003010 | TA16130 | PF11410c    | LmjF14.1100 |         |        |        |        |        |        | BBM_III09025 | 4 | api+ | 0 | 0 | Valid  |        |
| BBOV_III003020 | TA09240 | PFL2090c    | LmjF36.3850 | YLR025W | K12194 | K12194 | K12194 | K12194 | K12194 | BBM_III09030 | 5 |      | 5 | 1 | K12194 | K12194 |
|                |         |             |             |         |        |        |        |        |        | BBM_III09033 | 0 |      | 0 | 0 | NA     | Valid  |
| BBOV_III003040 | TA09230 | PFL2115c    | LmjF24.1210 | YGL236C | K03495 | K03495 |        | K03113 | K03495 | BBM_III09035 | 5 |      | 4 | 2 | NA     |        |
| BBOV_III003050 | TA09225 | PFL2110c    |             |         |        |        |        |        |        | BBM_III09040 | 3 | api  | 0 | 0 | Valid  |        |
| BBOV_IV008000  | TA16575 |             |             |         |        |        |        |        |        | BBM_III09045 | 2 | piro | 0 | 0 | Valid  |        |
| BBOV_IV008010  | TA16630 | PFL2105c    |             | YKL018W |        |        | K14962 |        | K14962 | BBM_III09050 | 4 | api+ | 2 | 1 | Valid  |        |
| BBOV_IV011250  | TA09610 | PFL2120w    | LmjF36.1340 | YDL040C |        |        |        |        | K00670 | BBM_III09055 | 5 |      | 1 | 1 | K00670 | K00670 |
| BBOV_IV008020  | TA16710 | PFL2125c    | LmjF36.0800 | YPL122C | K03144 | K03144 | K03144 | K03144 | K03144 | BBM_III09060 | 5 |      | 5 | 1 | K03144 | K03144 |
| BBOV_IV008030  | TA16715 | PFD0705c    |             |         |        |        |        |        |        | BBM_III09065 | 3 | api  | 0 | 0 | Valid  |        |
| BBOV_IV008040  | TA16720 |             |             |         | K08516 | K08516 |        |        |        | BBM_III09070 | 2 | piro | 2 | 1 | K08516 | K08516 |
|                | TA20775 | PF13_0140   | LmjF36.2610 | YMR113W |        |        | K11754 | K01930 | K01930 | BBM_III09075 | 4 |      | 3 | 2 | NA     |        |
| BBOV_IV008810  | TA06270 | PF08_0040   | LmjF25.2170 | YOR250C | K14399 | K14399 | K14399 |        | K14399 | BBM_III09080 | 5 |      | 4 | 1 | K14399 | K14399 |
| BBOV_IV008870  | TA06230 | PF08_0037   |             |         |        |        |        |        |        | BBM_III09085 | 3 | api  | 0 | 0 | Valid  |        |
| BBOV_IV008840  | TA06235 | PF08_0038   |             | YML025C |        |        |        |        |        | BBM_III09090 | 4 | api+ | 0 | 0 | Valid  |        |
| BBOV_IV008800  | TA06275 | MAL8P1.50   |             |         |        |        |        |        |        | BBM_III09095 | 3 | api  | 0 | 0 | Valid  |        |
|                |         |             |             |         |        |        |        |        |        | BBM_III09097 | 0 |      | 0 | 0 | NA     |        |
|                |         |             |             |         |        |        |        |        |        | BBM_III09100 | 0 |      | 0 | 0 | NA     |        |
| BBOV_IV008770  | TA06280 | PFF1015w    | LmjF32.1780 |         |        |        |        |        |        | BBM_III09105 | 4 | api+ | 0 | 0 | Valid  |        |
| BBOV_IV008760  |         |             |             |         | K12589 |        |        |        |        | BBM_III09110 | 1 |      | 1 | 1 | NA     |        |
| BBOV_IV008750  | TA06290 | PF10_0165   | LmjF33.1690 | YDL102W | K02327 | K02327 | K02327 | K02327 | K02327 | BBM_III09115 | 5 |      | 5 | 1 | K02327 | K02327 |
| BBOV_IV008740  | TA06295 | PF13_0219   | LmjF18.1610 | YOR206W | K14833 |        |        | K14833 | K14833 | BBM_III09125 | 5 |      | 3 | 1 | K14833 | K14833 |
| BBOV_IV008730  | TA06300 |             |             | YGR093W |        |        |        |        |        | BBM_III09130 | 3 |      | 0 | 0 | NA     |        |
| BBOV_IV008720  | TA06305 |             |             |         |        |        |        |        |        | BBM_III09135 | 2 | piro | 0 | 0 | Valid  |        |
|                |         |             |             |         |        |        |        |        |        | BBM_III09137 | 0 |      | 0 | 0 | NA     |        |
| BBOV_IV008600  | TA06385 | MAL13P1.153 |             | YIR015W | K03540 | K03540 | K03540 |        | K03540 | BBM_III09140 | 4 | api+ | 4 | 1 | K03540 | K03540 |
| BBOV_IV008670  | TA06325 |             |             | YGR095C |        |        |        |        | K12590 | BBM_III09145 | 3 |      | 1 | 1 | NA     |        |
|                |         |             |             |         |        |        |        |        |        | BBM_III09150 | 0 |      | 0 | 0 | NA     |        |
| BBOV_III004940 | TA13275 | PFC0240c    |             |         |        |        |        |        |        | BBM_III09155 | 3 | api  | 0 | 0 | Valid  |        |
| BBOV_III005160 | TA13260 | PF08_0031   | LmjF30.1050 | YLR348C |        |        |        |        | K13577 | BBM_III09160 | 5 |      | 1 | 1 | K13577 | K13577 |
|                |         | PF14_0247   | LmjF31.0450 |         |        |        |        |        |        | BBM_III09165 | 2 |      | 0 | 0 | NA     |        |
| BBOV_II006730  | TA14300 | PF14_0774   | LmjF23.0110 | YDL055C | K00966 | K00971 | K00966 | K00966 | K00966 | BBM_III09170 | 5 |      | 5 | 2 | K00966 | K00966 |
| BBOV_II006720  | TA14295 | PF08_0032   |             |         |        |        |        |        |        | BBM_III09175 | 3 | api  | 0 | 0 | Valid  |        |
| BBOV_I001000   | TA19745 | PFF1395c    |             | YBL080C |        |        |        |        | K02434 | BBM_III09180 | 4 | api+ | 1 | 1 | Valid  |        |
| BBOV_IV011320  | TA09565 | PFF1405c    |             |         |        |        |        |        |        | BBM_III09185 | 3 | api  | 0 | 0 | Valid  |        |
| BBOV_IV011310  | TA09570 | PFF1120c    |             |         |        |        |        |        |        | BBM_III09190 | 3 | api  | 0 | 0 | Valid  |        |
|                |         |             |             |         |        |        |        |        |        | BBM_III09195 | 0 |      | 0 | 0 | NA     |        |
| BBOV_IV011290  | TA09580 | PFF1115w    |             |         | K02641 | K02641 | K00528 |        |        | BBM_III09200 | 3 | api  | 3 | 2 | Valid  |        |

|                                                                    |
|--------------------------------------------------------------------|
| F-type H <sup>+</sup> -transporting ATPase subunit c [EC:3.6.3.14] |
| structure-specific recognition protein 1                           |
|                                                                    |
|                                                                    |
|                                                                    |
|                                                                    |
|                                                                    |
|                                                                    |
|                                                                    |
| small subunit ribosomal protein S26e                               |
|                                                                    |
| replication factor C subunit 2/4                                   |
|                                                                    |
|                                                                    |
| DNA-directed RNA polymerase, mitochondrial [EC:2.7.7.6]            |
|                                                                    |
|                                                                    |
|                                                                    |
| charged multivesicular body protein 4                              |
| translation initiation factor SU1                                  |
|                                                                    |
|                                                                    |
|                                                                    |
|                                                                    |
| peptide alpha-N-acetyltransferase [EC:2.3.1.88]                    |
| transcription initiation factor TFIIF subunit H4                   |
|                                                                    |
| synaptobrevin homolog YKT6                                         |
|                                                                    |
| polyribonucleotide 5'-hydroxyl-kinase [EC:2.7.1.78]                |
|                                                                    |
|                                                                    |
|                                                                    |
| DNA polymerase delta subunit 1 [EC:2.7.7.7]                        |
| NOC2, nucleolar complex protein 2                                  |
|                                                                    |
|                                                                    |
|                                                                    |
|                                                                    |
| ribonuclease P subunit RPR2 [EC:3.1.26.5]                          |
|                                                                    |
|                                                                    |
|                                                                    |
| mitochondrial dicarboxylate carrier                                |
|                                                                    |
|                                                                    |
| mannose-1-phosphate guanylyltransferase [EC:2.7.7.13]              |
|                                                                    |
|                                                                    |
|                                                                    |

|                |         |             |             |         |        |        |        |        |        |              |   |      |   |   |        |        |
|----------------|---------|-------------|-------------|---------|--------|--------|--------|--------|--------|--------------|---|------|---|---|--------|--------|
| BBOV_IV011340  | TA09545 | PFF1355w    |             | YBR257W | K03538 | K03538 | K03538 |        | K03538 | BBM_III09205 | 4 | api+ | 4 | 1 | K03538 | K03538 |
| BBOV_IV011330  | TA09555 | PFF1365c    |             |         |        |        |        |        |        | BBM_III09210 | 3 | api  | 0 | 0 | Valid  |        |
|                |         |             |             |         |        |        |        |        |        | BBM_III09215 | 0 |      | 0 | 0 | NA     |        |
| BBOV_IV011350  | TA09535 | PFF1385c    |             | YGR002C | K11324 | K11324 | K11324 |        | K11324 | BBM_III09225 | 4 | api+ | 4 | 1 | K11324 | K11324 |
| BBOV_IV011360  | TA09530 | PFF1375c    | LmjF36.5900 | YHR123W | K00993 | K00993 | K00993 |        | K00993 | BBM_III09230 | 5 |      | 5 | 1 | K00993 | K00993 |
| BBOV_IV000380  | TA19850 | PF14_0566   |             |         |        |        |        |        |        | BBM_III09240 | 3 | api  | 0 | 0 | Valid  |        |
| BBOV_I000790   | TA19845 |             |             | YDR485C |        |        |        |        | K11664 | BBM_III09250 | 3 |      | 1 | 1 | NA     |        |
| BBOV_I000800   | TA19840 | PFF1250w    | LmjF35.4280 |         |        |        |        |        |        | BBM_III09255 | 4 | api+ | 0 | 0 | Valid  |        |
| BBOV_IV000420  | TA19870 | PF11065c    |             |         |        |        |        |        |        | BBM_III09260 | 3 | api  | 0 | 0 | Valid  |        |
| BBOV_IV000430  | TA19875 | PF14_0675   |             | YLL005C |        |        |        |        |        | BBM_III09270 | 4 | api+ | 0 | 0 | Valid  |        |
| BBOV_IV000440  | TA19880 | PF11045w    |             | YDL048C |        |        |        |        |        | BBM_III09275 | 4 | api+ | 0 | 0 | Valid  |        |
|                | TA19885 | PF11050c    |             |         |        |        |        |        |        | BBM_III09280 | 2 |      | 0 | 0 | NA     |        |
| BBOV_IV000450  | TA19890 | PF11_0228   |             |         |        |        |        |        |        | BBM_III09285 | 3 | api  | 0 | 0 | Valid  |        |
| BBOV_IV000460  | TA19895 | MAL8P1.108  |             | YDL006W |        | K01090 | K01090 |        | K01090 | BBM_III09290 | 4 | api+ | 3 | 1 | K01090 | K01090 |
|                |         | PF08_0097   |             |         |        |        |        |        |        | BBM_III09295 | 1 |      | 0 | 0 | NA     |        |
| BBOV_III006320 | TA12780 | PFC0465c    |             | YPL075W |        |        |        |        |        | BBM_III09300 | 4 | api+ | 0 | 0 | Valid  |        |
| BBOV_III006330 | TA12775 | PFC0410w    | LmjF07.0820 | YDR374C |        |        |        |        |        | BBM_III09305 | 5 |      | 0 | 0 | Valid  |        |
| BBOV_III005980 | TA12765 |             | LmjF29.1780 | YIL103W |        |        |        |        |        | BBM_III09315 | 4 |      | 0 | 0 | NA     |        |
| BBOV_III005990 | TA12760 |             |             |         |        |        |        |        |        | BBM_III09320 | 2 | piro | 0 | 0 | Valid  |        |
| BBOV_III009930 | TA10085 | PF14_0373   | LmjF35.1540 | YEL024W | K00411 | K00411 | K00411 |        | K00411 | BBM_III09325 | 5 |      | 5 | 1 | K00411 | K00411 |
| BBOV_III000210 |         |             |             |         |        |        |        |        |        | BBM_III09330 | 1 |      | 0 | 0 | NA     |        |
| BBOV_I001550   |         | PF14_0375   | LmjF35.0840 |         |        |        |        |        |        | BBM_III09335 | 3 |      | 0 | 0 | NA     |        |
|                |         |             |             |         |        |        |        |        |        | BBM_III09340 | 0 |      | 0 | 0 | NA     |        |
|                | TA18360 |             | LmjF31.2180 |         |        |        |        |        |        | BBM_III09345 | 2 |      | 0 | 0 | NA     |        |
| BBOV_III000260 | TA18362 | MAL7P1.24   | LmjF36.6400 | YER126C | K14842 | K14842 | K14842 |        | K14842 | BBM_III09350 | 5 |      | 5 | 1 | K14842 | K14842 |
| BBOV_III000250 | TA18370 | PFC0765c    |             |         |        |        |        |        |        | BBM_III09355 | 3 | api  | 0 | 0 | Valid  |        |
|                |         |             |             |         |        |        |        |        |        | BBM_III09360 | 0 |      | 0 | 0 | NA     |        |
| BBOV_III006340 | TA14055 | PF14_0223   |             |         | K12737 | K12737 | K12737 |        |        | BBM_III09365 | 3 | api  | 3 | 1 | K12737 | K12737 |
| BBOV_III006350 | TA14060 | MAL7P1.25   | LmjF24.1030 | YER007W |        |        |        | K10411 |        | BBM_III09370 | 5 |      | 1 | 1 | K10411 | K10411 |
| BBOV_III006360 | TA14075 | PFL1285c    |             |         | K04802 | K04802 | K04802 |        |        | BBM_III09375 | 3 | api  | 3 | 1 | K04802 | K04802 |
| BBOV_III006370 |         |             |             | YBL020W |        |        |        |        | K06316 | BBM_III09380 | 2 |      | 1 | 1 | NA     |        |
| BBOV_III006380 | TA14090 | PF13_0272   |             |         |        | K01829 | K01829 |        |        | BBM_III09385 | 3 | api  | 2 | 1 | Valid  |        |
| BBOV_III006390 | TA14095 | MAL13P1.262 | LmjF30.0840 |         |        |        |        |        |        | BBM_III09390 | 4 | api+ | 0 | 0 | Valid  |        |
|                |         |             |             |         |        |        |        |        |        | BBM_III09395 | 0 |      | 0 | 0 | NA     |        |
|                |         |             |             |         |        |        |        |        |        | BBM_III09400 | 0 |      | 0 | 0 | NA     |        |
|                |         |             |             |         |        |        |        |        |        | BBM_III09405 | 0 |      | 0 | 0 | NA     |        |
| BBOV_III006420 | TA14105 | PFI0255c    | LmjF29.2780 | YJL133W | K03454 | K03454 |        |        | K03454 | BBM_III09410 | 5 |      | 3 | 1 | K03454 | K03454 |
|                |         |             |             |         |        |        |        |        |        | BBM_III09415 | 0 |      | 0 | 0 | NA     |        |
| BBOV_III002890 | TA08715 | PFI0230c    |             |         |        |        |        |        |        | BBM_III09420 | 3 | api  | 0 | 0 | Valid  |        |
| BBOV_III002880 | TA08610 | PFI0220w    | LmjF25.0820 | YNL153C | K09550 | K09550 | K09550 |        | K09550 | BBM_III09425 | 5 |      | 5 | 1 | K09550 | K09550 |
| BBOV_III002870 | TA08609 | PFI0215c    | LmjF15.0580 | YLR066W |        | K01423 | K01423 |        | K12948 | BBM_III09430 | 5 |      | 3 | 2 | NA     |        |
| BBOV_III002860 | TA08555 | PFI0205w    |             |         |        |        |        |        |        | BBM_III09435 | 3 | api  | 0 | 0 | Valid  |        |
| BBOV_III002850 |         | PFI0200c    |             |         | K12400 |        | K12400 |        |        | BBM_III09440 | 2 |      | 2 | 1 | NA     |        |
| BBOV_III002840 | TA08495 | PFI0195c    | LmjF36.6370 |         |        |        |        |        |        | BBM_III09445 | 4 | api+ | 0 | 0 | Valid  |        |
| BBOV_III002830 | TA08390 | PFI0190w    | LmjF35.2050 | YBL092W | K02912 | K02912 | K02912 |        | K02912 | BBM_III09450 | 5 |      | 5 | 1 | K02912 | K02912 |
| BBOV_III002820 | TA08335 | PFI0180w    | LmjF13.0390 | YML085C | K07374 | K07374 | K07374 |        | K07374 | BBM_III09455 | 5 |      | 5 | 1 | K07374 | K07374 |
| BBOV_III002800 | TA08280 |             |             |         |        |        |        |        |        | BBM_III09460 | 2 | piro | 0 | 0 | Valid  |        |
|                |         |             |             |         |        |        |        |        |        | BBM_III09462 |   |      |   |   | Valid  |        |
| BBOV_III002790 | TA08165 | PFL1430c    | LmjF32.1450 |         |        |        |        |        |        | BBM_III09465 | 4 | api+ | 0 | 0 | Valid  |        |
| BBOV_III002780 | TA08060 | PFL1425w    | LmjF23.1220 | YJL014W | K09495 | K09495 | K09495 |        | K09495 | BBM_III09475 | 5 |      | 5 | 1 | K09495 | K09495 |
| BBOV_III003230 | TA09145 | PFL1290w    |             |         |        |        |        |        |        | BBM_III09480 | 3 | api  | 0 | 0 | Valid  |        |
| BBOV_III003220 |         | PFL1470c    |             |         |        |        |        |        |        | BBM_III09485 | 2 |      | 0 | 0 | NA     |        |
| BBOV_III003180 | TA09180 | PF14_0391   | LmjF36.3760 | YPL220W | K02865 | K02865 | K02865 |        | K02865 | BBM_III09490 | 5 |      | 5 | 1 | K02865 | K02865 |
|                |         |             |             |         |        |        |        |        |        | BBM_III09495 | 0 |      | 0 | 0 | NA     |        |

|                                                                    |
|--------------------------------------------------------------------|
| POP4, RPP29, ribonuclease P protein subunit POP4 [EC:3.1.26.5]     |
|                                                                    |
|                                                                    |
| DNA methyltransferase 1-associated protein 1                       |
| ethanolaminephosphotransferase [EC:2.7.8.1]                        |
|                                                                    |
|                                                                    |
|                                                                    |
|                                                                    |
|                                                                    |
| protein phosphatase [EC:3.1.3.16]                                  |
|                                                                    |
|                                                                    |
|                                                                    |
|                                                                    |
| ubiquinol-cytochrome c reductase iron-sulfur subunit [EC:1.10.2.2] |
|                                                                    |
|                                                                    |
|                                                                    |
|                                                                    |
| NSA2, ribosome biogenesis protein NSA2                             |
|                                                                    |
| peptidyl-prolyl cis-trans isomerase SDCCAG10 [EC:5.2.1.8]          |
| dynein light chain 1, axonemal                                     |
| proliferating cell nuclear antigen                                 |
|                                                                    |
|                                                                    |
|                                                                    |
|                                                                    |
|                                                                    |
| mitochondrial carrier protein, MC family                           |
|                                                                    |
|                                                                    |
| prefoldin subunit 4                                                |
|                                                                    |
|                                                                    |
|                                                                    |
|                                                                    |
| large subunit ribosomal protein L32e                               |
| tubulin alpha                                                      |
|                                                                    |
| tRNA, Ser. anticodon GCT                                           |
|                                                                    |
| T-complex protein 1 subunit gamma                                  |
|                                                                    |
|                                                                    |
| large subunit ribosomal protein L10Ae                              |





|               |            |             |             |         |        |        |        |        |        |              |   |      |   |   |        |        |                                                             |
|---------------|------------|-------------|-------------|---------|--------|--------|--------|--------|--------|--------------|---|------|---|---|--------|--------|-------------------------------------------------------------|
|               |            | MAL13P1.299 | LmjF36.0360 | YKL207W |        |        |        |        |        | BBM_III09785 | 3 |      | 0 | 0 | NA     |        |                                                             |
| BBOV_II004860 | TA12210    | PF13_0318   |             |         |        |        |        |        |        | BBM_III09790 | 3 | api  | 0 | 0 | Valid  |        |                                                             |
| BBOV_II004850 | TA12215    | PF13_0317   | LmjF32.1340 | YDR245W |        |        | K14401 | K05531 |        | BBM_III09795 | 5 |      | 2 | 2 | NA     |        |                                                             |
| BBOV_II004820 | TA12230    | MAL13P1.319 | LmjF21.0830 | YKL211C |        | K01658 |        | K01656 |        | BBM_III09800 | 5 |      | 2 | 2 | NA     |        |                                                             |
| BBOV_II004810 | TA12235    | PF13_0335   |             | YKL213C |        |        |        | K14018 |        | BBM_III09805 | 4 | api+ | 1 | 1 | Valid  |        |                                                             |
|               | TA12240    |             |             |         |        |        |        |        |        | BBM_III09810 | 1 |      | 0 | 0 | NA     |        |                                                             |
|               | TA13300    | PFD0550c    |             |         |        |        |        |        |        | BBM_III09815 | 2 |      | 0 | 0 | NA     |        |                                                             |
| BBOV_IV000690 | TA20015    | PF13_0334   |             | YMR156C | K08073 |        | K08073 | K08075 |        | BBM_III09820 | 4 | api+ | 3 | 2 | Valid  |        |                                                             |
| BBOV_IV000680 | TA20010    | PFB0915w    | LmjF26.1030 |         |        |        |        |        |        | BBM_III09825 | 4 | api+ | 0 | 0 | Valid  |        |                                                             |
| BBOV_IV000660 | TA20005    | PFL1735c    |             | YDR416W | K12867 | K12867 | K12867 | K12867 |        | BBM_III09830 | 4 | api+ | 4 | 1 | K12867 | K12867 | pre-mRNA-splicing factor SYF1                               |
|               |            | PFL1960w    |             |         |        |        |        | K13850 |        | BBM_III09835 | 1 |      | 1 | 1 | NA     |        |                                                             |
|               |            |             |             |         |        |        |        |        |        | BBM_III09840 | 0 |      | 0 | 0 | NA     |        |                                                             |
|               |            |             |             |         |        |        |        |        |        | BBM_III09842 |   |      |   |   | Valid  |        | tRNA, His, anticodon GTG                                    |
|               |            |             |             |         |        |        |        |        |        | BBM_III09843 |   |      |   |   | Valid  |        | tRNA, Phe, anticodon GAA                                    |
| BBOV_IV000610 | TA19990    |             |             | YOR014W | K11584 | K11584 |        | K11584 |        | BBM_III09845 | 3 |      | 3 | 1 | K11584 | K11584 | protein phosphatase 2 (formerly 2A), regulatory subunit B'  |
| BBOV_IV000600 | TA19985    | PF07_0127   |             |         |        |        |        |        |        | BBM_III09850 | 3 | api  | 0 | 0 | Valid  |        |                                                             |
|               |            |             |             |         |        |        |        |        |        | BBM_III09855 | 0 |      | 0 | 0 | NA     |        |                                                             |
|               |            |             |             |         |        |        |        |        |        | BBM_III09860 | 0 |      | 0 | 0 | NA     |        |                                                             |
| BBOV_IV000590 | TA19975    | PFF0570c    |             |         |        |        |        |        |        | BBM_III09865 | 3 | api  | 0 | 0 | Valid  |        |                                                             |
| BBOV_II004840 | TA12220    | MAL13P1.298 |             |         |        |        |        |        |        | BBM_III09870 | 3 | api  | 0 | 0 | Valid  |        |                                                             |
|               |            |             |             |         |        |        |        |        |        | BBM_III09880 | 0 |      | 0 | 0 | NA     |        |                                                             |
| BBOV_IV000570 | TA19965    | MAL7P1.19   | LmjF32.1090 | YKL010C | K10590 | K10590 |        | K10590 | K10590 | BBM_III09890 | 5 |      | 4 | 1 | K10590 | K10590 | E3 ubiquitin-protein ligase TRIP12 [EC:6.3.2.19]            |
|               |            |             |             |         |        |        |        |        |        | BBM_III09895 | 0 |      | 0 | 0 | NA     |        |                                                             |
| BBOV_IV000560 | TA19955    | PF07_0015   | LmjF29.2540 | YBL024W |        | K00599 |        |        |        | BBM_III09900 | 5 |      | 1 | 1 | K00599 | K00599 | Amino Acid Metabolism                                       |
| BBOV_IV000550 | TA19950    | PFE0510c    |             |         |        |        |        |        |        | BBM_III09905 | 3 | api  | 0 | 0 | Valid  |        |                                                             |
| BBOV_IV000540 |            |             | LmjF33.0650 |         |        |        |        |        |        | BBM_III09910 | 2 |      | 0 | 0 | NA     |        |                                                             |
|               |            |             |             |         |        |        |        |        |        | BBM_III09915 | 0 |      | 0 | 0 | NA     |        |                                                             |
|               |            |             |             |         |        |        |        |        |        | BBM_III09917 | 0 |      | 0 | 0 | NA     | Valid  | ribosomal L39 protein                                       |
|               | TA12315    |             |             |         |        |        |        |        |        | BBM_III09920 | 1 |      | 0 | 0 | NA     |        |                                                             |
|               |            |             |             |         |        |        |        |        |        | BBM_III09925 | 0 |      | 0 | 0 | NA     |        |                                                             |
|               | TA12330    |             |             |         |        |        |        |        |        | BBM_III09930 | 1 |      | 0 | 0 | NA     |        |                                                             |
| BBOV_II004690 | TA12325    | PFC0970w    | LmjF07.0150 | YER140W |        |        |        |        |        | BBM_III09935 | 5 |      | 0 | 0 | Valid  |        |                                                             |
| BBOV_IV007730 | TA03740    | PF11_0162   | LmjF08.1020 |         |        | K01376 |        | K13537 |        | BBM_III09940 | 4 | api+ | 2 | 2 | Valid  |        |                                                             |
| BBOV_II004670 | TA12335    | PFE0980c    | LmjF34.2220 |         |        |        | K12603 |        |        | BBM_III09945 | 4 | api+ | 1 | 1 | Valid  |        |                                                             |
| BBOV_II004660 | TA12340    | PFC0855w    |             |         |        | K10573 | K10574 | K10574 |        | BBM_III09950 | 3 | api  | 3 | 2 | Valid  |        |                                                             |
| BBOV_II004650 | TA12345    | PFC0900w    | LmjF32.1000 | YJR064W | K09497 | K09497 | K09497 | K09497 |        | BBM_III09955 | 5 |      | 5 | 1 | K09497 | K09497 | T-complex protein 1 subunit epsilon                         |
|               |            |             |             |         |        |        |        |        |        | BBM_III09960 | 0 |      | 0 | 0 | NA     |        |                                                             |
| BBOV_II004640 | TA12350    | PFC0890w    |             | YLR268W |        | K08517 | K08517 |        | K08517 | BBM_III09965 | 4 | api+ | 3 | 1 | K08517 | K08517 | vesicle transport protein SEC22                             |
|               |            |             |             |         |        |        |        |        |        | BBM_III09970 | 0 |      | 0 | 0 | NA     |        |                                                             |
|               | TA15010    |             |             | YLR215C |        |        |        |        |        | BBM_III09975 | 2 |      | 0 | 0 | NA     | Valid  | BMN family (1)                                              |
|               |            |             |             |         |        |        |        |        |        | BBM_III09980 | 0 |      | 0 | 0 | NA     | Valid  | BMN family (2)                                              |
| BBOV_VI000010 | q2ca38.01  | PlfaoMp2    |             | Q0045   | K02256 | K02256 | K02256 |        | K02256 | BBM_mt00005  | 4 | api+ | 4 | 1 | K02256 | K02256 | cox1, cytochrome c oxidase subunit 1 [EC:1.9.3.1]           |
|               |            |             |             |         |        |        |        |        |        | BBM_mt00010  |   |      |   |   | Valid  |        | lsu4 rRNA gene, fragment of LSU rRNA                        |
|               |            |             |             |         |        |        |        |        |        | BBM_mt00015  |   |      |   |   | Valid  |        | lsu5 rRNA gene, fragment of LSU rRNA                        |
| BBOV_VI000060 | q2ca38.03c | PlfaoMp3    |             | Q0105   | K00412 | K00412 | K00412 |        | K00412 | BBM_mt00020  | 4 | api+ | 4 | 1 | K00412 | K00412 | cytb, ubiquinol-cytochrome c reductase cytochrome b subunit |
|               |            |             |             |         |        |        |        |        |        | BBM_mt00025  |   |      |   |   | Valid  |        | lsu2 rRNA gene, fragment of LSU rRNA                        |
|               |            |             |             |         |        |        |        |        |        | BBM_mt00030  |   |      |   |   | Valid  |        | lsu6 rRNA gene, fragment of LSU rRNA                        |
| BBOV_VI000020 | q2ca38.02c | PlfaoMp1    |             | Q0275   |        | K02262 |        |        | K02262 | BBM_mt00035  | 4 | api+ | 2 | 1 | K02262 | K02262 | cox3, cytochrome c oxidase subunit 3                        |
|               |            |             |             |         |        |        |        |        |        | BBM_mt00040  |   |      |   |   | Valid  |        | ssu6 rRNA gene, fragment of SSU rRNA                        |
|               |            |             |             |         |        |        |        |        |        | BBM_mt00045  |   |      |   |   | Valid  |        | ssu7 rRNA gene, fragment of SSU rRNA                        |
|               |            |             |             |         |        |        |        |        |        | BBM_mt00050  |   |      |   |   | Valid  |        | lsu1 rRNA gene, fragment of LSU rRNA                        |
|               |            |             |             |         |        |        |        |        |        | BBM_mt00055  |   |      |   |   | Valid  |        | lsu3 rRNA gene, fragment of LSU rRNA                        |
